# Supplementary material for: Facile access to thieno[2,3-b]thiophenes and poly-substituted thiophenes through divergent annulation of ketene 1,3-dithietanes
Source: Royal Society of Chemistry journal article supplement (doi:10.1039/d3qo01941a), 2023-11-28
Supplement: d3qo01941a1.pdf [file d3qo01941a1.pdf]

## *Supporting Information*

# **Facile Access to Thieno[2,3-b]thiophenes and Poly-substituted thiophenes through Divergent Annulation of Ketene 1,3-Dithietanes**

You Wu,<sup>a</sup> Shuqi Wang,<sup>a</sup> Bo Peng,<sup>a</sup> Jie Cen,<sup>a</sup> Yongping Yu, \*<sup>a,b</sup> Wenteng Chen \*<sup>a,b</sup>

a. College of Pharmaceutical Sciences, Zhejiang University, Hangzhou, Zhejiang, China, 310058

b. Jinhua Institute of Zhejiang University, Jinhua, 321299, China.

\*Corresponding authors. [wentengchen@zju.edu.cn](mailto:wentengchen@zju.edu.cn) (for W. Chen),  
[yyu@zju.edu.cn](mailto:yyu@zju.edu.cn) (for Y. Yu)

### **Table of Contents**

|                                                                                       |         |
|---------------------------------------------------------------------------------------|---------|
| I. General Information .....                                                          | S2      |
| II. Synthesis and Characterization Data of Starting Materials and Final Products..... | S2-S15  |
| III. X-ray Crystallography Data of 1a .....                                           | S16     |
| IV. X-ray Crystallography Data of 3a .....                                            | S17     |
| V. X-ray Crystallography Data of 5e .....                                             | S18     |
| VI. <sup>1</sup> H NMR and <sup>13</sup> C NMR Spectra of Starting Materials .....    | S19-S28 |
| VII. <sup>1</sup> H NMR and <sup>13</sup> C NMR Spectra of Final Products.....        | S29-S59 |
| VIII. <sup>1</sup> H NMR Spectra of Detected Intermediate e.....                      | S60-S61 |

## I. General Information

Unless otherwise noted, all reagents and solvents were purchased from commercial sources and used without purification. Purifications of reaction products were carried out by chromatography using silica gel (200-300 mesh). Melting points were recorded on a BÜCHI B-540 melting point apparatus. NMR spectra were recorded for  $^1\text{H}$  NMR at 500 MHz and for  $^{13}\text{C}$  NMR at 125 MHz. For  $^1\text{H}$  NMR, tetramethylsilane (TMS) served as internal standard ( $\delta = 0$ ) and data are reported as follows: chemical shift, integration, multiplicity (s = singlet, d = doublet, t = triplet, q = quartet, m = multiplet), and coupling constant(s) in Hz. For  $^{13}\text{C}$  NMR, TMS ( $\delta = 0$ ) or Chloroform-*d* ( $\delta = 77.26$ ) was used as internal standard and spectra were obtained with complete proton decoupling. HPLC analysis and the HRMS of all final products were confirmed on a Agilent 1290 HPLC-6224 Time of Flight Mass Spectrometer using PhenomenexLuna 5  $\mu$  C18, 100 Å, 150  $\times$  4.60 mm 5  $\mu$ m column at a flow rate of 0.5 mL/min using liner gradients buffer B in A (B:  $\text{CH}_3\text{OH}$  containing 0.1% formic acid, A:  $\text{H}_2\text{O}$  containing 0.1% formic acid). Mobile phase B was increased linearly from 5% to 95% over 7 min and 95% over the next 2 min, after which the column was equilibrated to 5% for 1 min. Sulfur ylides and substituted phenylacetaldehydes were synthesized according to literature procedure.<sup>1,2</sup>

References:

1. Sabounchei, S. J.; Ahmadianpoor, M.; Yousefi, A.; Bayat, M.; Sedghi, A.; Bagherjeri, F. A.; Gable, R. W. *RSC Adv.* **2016**, 6, 28308
2. Al-Smadi, D.; Enugala, T. R.; Norberg, T.; Kihlberg, J.; Widersten, M. *Synlett* **2018**, 29, 1187-1190.

## II. Synthesis and Characterization Data of Starting Materials and Final Products

### 1) Synthesis and characterization of 1,3-dithietanes 1

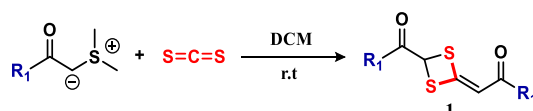

**Typical procedure:** To a 25 mL flask were added sulfur ylides (180 mg, 1.0 equiv),  $\text{CS}_2$  (1 mL, 16 equiv.) and DCM (4 mL). The mixture was stirred at room temperature for 30 min. After the completion of the reaction *via* TLC, the organic phase was removed under vacuum. Then the residue was purified by silica gel flash column chromatography (PE/DCM = 1/1) to afford product 1.

**Table S1. Reaction Optimization for the Synthesis of 1, 3-Dithietanes 1**

The reaction scheme shows a sulfur ylide (A) with a phenyl group reacting with carbon disulfide (S=C=S) in a solvent at room temperature (r.t.) to produce the 1,3-dithietane product (1a).

| entry | A: $\text{CS}_2$ | solvent                  | Concentration (A) | yield (%) <sup>b</sup> |
|-------|------------------|--------------------------|-------------------|------------------------|
| 1     | 1:1.5            | $\text{CHCl}_3$          | 1 M               | 44                     |
| 2     | 1:1.5            | DCM                      | 1 M               | 46                     |
| 3     | 1:1.5            | $\text{CH}_3\text{CN}$   | 1 M               | 18                     |
| 4     | 1:1.5            | EtOH                     | 1 M               | 33                     |
| 5     | 1:1.5            | THF                      | 1 M               | 39                     |
| 6     | 1:1.5            | $\text{CH}_3\text{COOH}$ | 1 M               | trace                  |
| 7     | 1:1.5            | Toluene                  | 1 M               | 36                     |

|           |             |                                   |              |           |
|-----------|-------------|-----------------------------------|--------------|-----------|
| 8         | 1:1.5       | DMF                               | 1 M          | 14        |
| 9         | 1:1.5       | DCE                               | 1 M          | 46        |
| 10        | 1:1.5       | CH <sub>3</sub> COCH <sub>3</sub> | 1 M          | 28        |
| 11        | 1:1.5       | MTBE                              | 1 M          | 31        |
| 12        | 1:1.5       | CS <sub>2</sub>                   | 1 M          | 36        |
| 13        | 1:1.5       | H <sub>2</sub> O                  | 1 M          | 24        |
| 14        | 1:2.5       | DCM                               | 1 M          | 47        |
| 15        | 1:10        | DCM                               | 1 M          | 56        |
| 16        | 1:15        | DCM                               | 1 M          | 63        |
| 17        | 1:25        | DCM                               | 1 M          | 62        |
| 18        | 1:15        | DCM                               | 2 M          | 31        |
| 19        | 1:15        | DCM                               | 0.5M         | 68        |
| <b>20</b> | <b>1:15</b> | <b>DCM</b>                        | <b>0.25M</b> | <b>86</b> |

<sup>a</sup> Reaction conditions: A (1mmol), CS<sub>2</sub>, and solvent at room temperature for 30 min.

<sup>b</sup> Isolated yield; yields were calculated based on A.

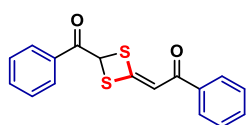

**2-(4-benzoyl-1,3-dithietan-2-ylidene)-1-phenylethan-1-one(1a)**

yellow solid; 134 mg (86% yield); m.p. 146.7-147.4 °C.

<sup>1</sup>H NMR (500 MHz, Chloroform-*d*) δ 7.89-7.81 (m, 4H), 7.67-7.62 (m, 1H), 7.55-7.49 (m, 3H), 7.46-7.43 (m, 2H), 7.06 (s, 1H), 6.08 (s, 1H).

<sup>13</sup>C NMR (125 MHz, Chloroform-*d*) δ 191.3, 189.2, 162.7, 137.4, 134.6, 132.8, 132.9, 129.4, 128.8, 128.5, 127.9, 107.6, 48.3.

HRMS (ESI): m/z calcd for (C<sub>17</sub>H<sub>12</sub>O<sub>2</sub>S<sub>2</sub>+H)<sup>+</sup>: 313.0351; found: 313.0346.

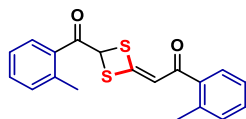

**2-(4-(2-methylbenzoyl)-1,3-dithietan-2-ylidene)-1-(o-tolyl)ethan-1-one(1b)**

yellow solid; 130 mg (77% yield); m.p. 93.5-93.9 °C.

<sup>1</sup>H NMR (500 MHz, Chloroform-*d*) δ 7.50-7.48 (m, 1H), 7.48-7.41 (m, 2H), 7.35-7.26 (m, 3H), 7.24-7.20 (m, 2H), 6.78 (s, 1H), 6.06 (s, 1H), 2.61 (s, 3H), 2.48 (s, 3H).

<sup>13</sup>C NMR (125 MHz, Chloroform-*d*) δ 194.1, 193.0, 161.4, 140.5, 138.4, 138.0, 133.1, 133.1, 132.5, 131.8, 131.1, 128.5, 128.2, 126.2, 125.8, 110.8, 49.5, 21.7, 20.9.

HRMS (ESI): m/z calcd for (C<sub>19</sub>H<sub>16</sub>O<sub>2</sub>S<sub>2</sub> +H)<sup>+</sup>:341.0664; found: 341.0668.

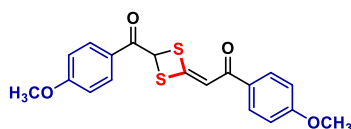

**2-(4-(4-methoxybenzoyl)-1,3-dithietan-2-ylidene)-1-(4-methoxyphenyl)ethan-1-one (1c)**

yellow solid; 134 mg (72% yield); m.p. 140.3-141.1 °C.

<sup>1</sup>H NMR (500 MHz, Chloroform-*d*) δ 7.86-7.80(m, 4H), 7.01 (s, 1H), 6.98-6.91 (m, 4H), 6.03 (s, 1H), 3.89 (s, 3H), 3.85 (s, 3H).

<sup>13</sup>C NMR (125 MHz, Chloroform-*d*) δ 189.7, 187.8, 164.5, 163.2, 161.5, 130.8, 130.2, 129.9, 125.7,

114.5, 113.9, 107.1, 55.7, 55.5, 48.0.

HRMS (ESI): m/z calcd for (C<sub>19</sub>H<sub>16</sub>O<sub>4</sub>S<sub>2</sub> +H)<sup>+</sup>:373.0563; found: 373.0556.

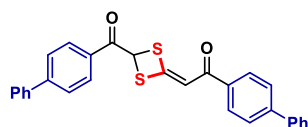

**2-(4-([1,1'-biphenyl]-4-carbonyl)-1,3-dithietan-2-ylidene)-1-([1,1'-biphenyl]-4-yl)ethan-1-one(1d)**

yellow solid; 190 mg (82% yield); m.p. 191.3-191.8 °C.

<sup>1</sup>H NMR (500 MHz, DMSO-*d*<sub>6</sub>) δ 8.07-7.97 (m, 4H), 7.94-7.89 (m, 2H), 7.84-7.78 (m, 4H), 7.76-7.73 (m, 2H), 7.57 (s, 1H), 7.54-7.48 (m, 4H), 7.46-7.39 (m, 2H), 6.78 (s, 1H).

<sup>13</sup>C NMR (125 MHz, DMSO-*d*<sub>6</sub>) δ 191.3, 187.3, 163.3, 145.7, 144.2, 138.9, 138.6, 135.8, 131.6, 129.2, 129.1, 128.7, 128.3, 127.5, 127.1, 127.0, 127.0, 107.9, 47.5.

HRMS (ESI): m/z calcd for (C<sub>29</sub>H<sub>20</sub>O<sub>2</sub>S<sub>2</sub> +H)<sup>+</sup>:465.0977; found: 465.0978.

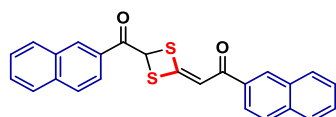

**2-(4-(2-naphthoyl)-1,3-dithietan-2-ylidene)-1-(naphthalen-2-yl)ethan-1-one(1e)**

yellow solid; 175 mg (85% yield); m.p. 189.4-189.7 °C.

<sup>1</sup>H NMR (500 MHz, DMSO-*d*<sub>6</sub>) δ 8.67 (s, 1H), 8.62 (s, 1H), 8.18-8.17 (m, 1H), 8.13-8.11 (m, 1H), 8.09-8.04 (m, 2H), 8.01-7.96 (m, 4H), 7.75-7.72 (m, 1H), 7.70-7.60 (m, 4H), 6.89 (s, 1H).

<sup>13</sup>C NMR (125 MHz, DMSO-*d*<sub>6</sub>) δ 192.1, 188.1, 135.9, 135.3, 134.8, 132.8, 132.6, 131.0, 130.7, 130.2, 129.8, 129.9, 129.6, 129.5, 129.0, 128.3, 128.2, 127.9, 127.4, 124.0, 108.5, 47.9.

HRMS (ESI): m/z calcd for (C<sub>25</sub>H<sub>16</sub>O<sub>2</sub>S<sub>2</sub> +H)<sup>+</sup>:413.0670; found: 413.0673.

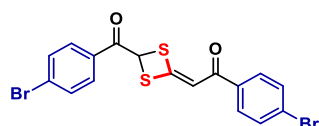

**2-(4-(4-bromobenzoyl)-1,3-dithietan-2-ylidene)-1-(4-bromophenyl)ethan-1-one(1f)**

yellow solid; 163 mg (70% yield); m.p. 183.3-183.6 °C.

<sup>1</sup>H NMR (500 MHz, DMSO-*d*<sub>6</sub>) δ 7.90-7.85 (m, 2H), 7.85-7.79 (m, 4H), 7.73-7.71 (m, 2H), 7.50 (s, 1H), 6.69 (s, 1H).

<sup>13</sup>C NMR (125 MHz, DMSO-*d*<sub>6</sub>) δ 191.5, 187.2, 164.7, 136.4, 132.9, 132.4, 132.4, 130.8, 130.1, 129.1, 127.3, 108.2, 47.7.

HRMS (ESI): m/z calcd for (C<sub>17</sub>H<sub>10</sub>Br<sub>2</sub>O<sub>2</sub>S<sub>2</sub> +Na)<sup>+</sup>: 490.8381; found: 490.8376.

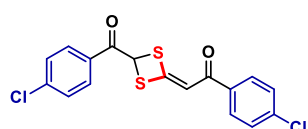

**2-(4-(4-chlorobenzoyl)-1,3-dithietan-2-ylidene)-1-(4-chlorophenyl)ethan-1-one(1g)**

yellow solid; 161 mg (85% yield); m.p. 195.7-196.5 °C.

<sup>1</sup>H NMR (500 MHz, DMSO-*d*<sub>6</sub>) δ 7.99-7.94 (m, 2H), 7.94-7.89 (m, 2H), 7.71-7.65 (m, 2H), 7.62-7.55 (m, 2H), 7.50 (s, 1H), 6.70 (s, 1H).

<sup>13</sup>C NMR (125 MHz, DMSO-*d*<sub>6</sub>) δ 190.8, 186.5, 164.2, 139.4, 137.7, 135.6, 131.7, 130.3, 129.5, 129.5, 129.0, 107.7, 47.2.

HRMS (ESI): *m/z* calcd for (C<sub>17</sub>H<sub>10</sub>Cl<sub>2</sub>O<sub>2</sub>S<sub>2</sub> + H)<sup>+</sup>:380.9572; found: 380.9573.

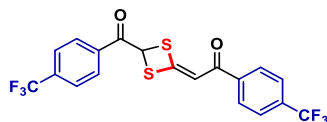

**2-(4-(4-(trifluoromethyl)benzoyl)-1,3-dithietan-2-ylidene)-1-(4-(trifluoromethyl)phenyl)ethan-1-one(1h)**

yellow solid; 202 mg (90% yield); m.p. 175.6-175.9 °C.

<sup>1</sup>H NMR (500 MHz, DMSO-*d*<sub>6</sub>) δ 8.17-8.15 ((m, 2H), 8.10-8.09 (m, 2H), 7.99-7.98 (m, 2H), 7.89 - 7.88 (m, 2H), 7.58 (s, 1H), 6.78 (s, 1H).

<sup>13</sup>C NMR (125 MHz, DMSO-*d*<sub>6</sub>) δ 191.2, 186.6, 165.4, 140.2, 136.4, 133.4 (q, *J* = 32 Hz), 132.2 (q, *J* = 32 Hz), 129.3, 128.4, 126.3 (q, *J* = 7.0, 3.6 Hz), 125.9 (q, *J* = 3.6 Hz), 124.8 (d, *J* = 27 Hz), 122.6 (d, *J* = 27 Hz), 108.0, 47.3.

HRMS (ESI): *m/z* calcd for (C<sub>19</sub>H<sub>10</sub>F<sub>6</sub>O<sub>2</sub>S<sub>2</sub> + Na)<sup>+</sup>:470.9919; found: 470.9907.

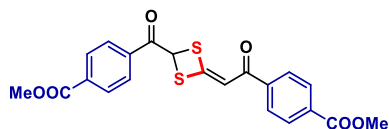

**methyl 4-(2-(4-(4-(methoxycarbonyl)benzoyl)-1,3-dithietan-2-ylidene)acetyl)benzoate(1i)**

yellow solid; 152 mg (71% yield); m.p. 198.7-199.6 °C.

<sup>1</sup>H NMR (500 MHz, DMSO-*d*<sub>6</sub>) δ 8.16-8.12 (m, 2H), 8.09-8.05 (m, 4H), 8.04-8.01 (m, 2H), 7.56 (s, 1H), 6.75 (s, 1H), 3.91 (s, 3H), 3.88 (s, 3H).

<sup>13</sup>C NMR (125 MHz, DMSO-*d*<sub>6</sub>) δ 191.5, 187.0, 165.6, 165.4, 165.1, 140.5, 136.4, 134.2, 132.9, 129.9, 129.6, 128.8, 127.9, 108.1, 52.7, 52.5, 47.4.

HRMS (ESI): *m/z* calcd for (C<sub>21</sub>H<sub>16</sub>O<sub>6</sub>S<sub>2</sub> + H)<sup>+</sup>:429.0461; found: 429.0463.

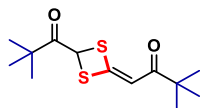

**3,3-dimethyl-1-(4-pivaloyl-1,3-dithietan-2-ylidene)butan-2-one(1j)**

yellow solid; 120 mg (88% yield); m.p. 86.4-87.0 °C.

<sup>1</sup>H NMR (500 MHz, Chloroform-*d*) δ 6.49 (s, 1H), 5.62 (s, 1H), 1.21 (s, 9H), 1.12 (s, 9H).

<sup>13</sup>C NMR (125 MHz, Chloroform-*d*) δ 206.4, 205.3, 160.8, 107.1, 47.0, 44.7, 42.7, 26.9, 26.7.

HRMS (ESI): *m/z* calcd for (C<sub>13</sub>H<sub>20</sub>O<sub>2</sub>S<sub>2</sub> + H)<sup>+</sup>:295.0802; found: 295.0798.

## 2) Synthesis and characterization data of thieno[2,3-b]thiophenes 3

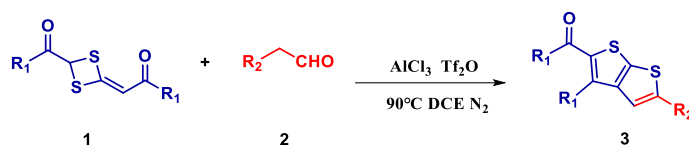

**Typical procedure** (with **3m** as an example): To a 25 mL of dried schlenk tube equipped with a magnetic stir bar was charged with 1,3-dithietane **1a** (100 mg, 1.0 equiv), hexanal (80  $\mu\text{L}$ , 2.0 equiv),  $\text{AlCl}_3$  (9 mg, 20 mol%),  $\text{Tf}_2\text{O}$  (10  $\mu\text{L}$ , 20 mol%) and 2 mL DCE under  $\text{N}_2$  atmosphere. The mixture was then stirred at  $90^\circ\text{C}$  for 12 h. After the reaction, the mixture was cooled to room temperature, and the organic phase was removed under vacuum. Purification of the crude product by silica-gel chromatography using PE/DCM affords thieno[2,3-b]thiophenes **3m**.

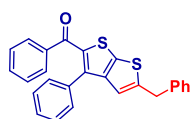

### (5-benzyl-3-phenylthieno[2,3-b]thiophen-2-yl)(phenyl)methanone (**3a**)

yellow solid; 96 mg (60% yield); m.p.  $157.8\text{-}158.3^\circ\text{C}$ .

$^1\text{H NMR}$  (500 MHz, Chloroform-*d*)  $\delta$  7.56 -7.51 (m, 2H), 7.35-7.30 (m, 2H), 7.29-7.26 (m, 3H), 7.26-7.22 (m, 3H), 7.17-7.14 (m, 3H), 7.13-7.09 (m, 2H), 6.96 (s, 1H), 4.20 (s, 2H).

$^{13}\text{C NMR}$  (125 MHz,  $\text{CDCl}_3$ )  $\delta$  190.3, 149.1, 147.5, 141.2, 140.2, 139.6, 139.5, 137.8, 135.2, 132.0, 129.8, 129.6, 128.9, 128.7, 128.3, 128.0, 127.8, 127.0, 118.7, 37.5.

HRMS (ESI):  $m/z$  calcd for  $(\text{C}_{26}\text{H}_{18}\text{OS}_2+\text{H})^+$ : 411.0872; found: 411.0881.

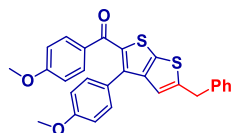

### (5-benzyl-3-(4-methoxyphenyl)thieno[2,3-b]thiophen-2-yl)(4-methoxyphenyl)methanone (**3b**)

brown solid; 80 mg (53% yield); m.p.  $70.4\text{-}70.9^\circ\text{C}$ .

$^1\text{H NMR}$  (500 MHz, Chloroform-*d*)  $\delta$  7.62-7.57 (m, 2H), 7.35-7.30 (m, 2H), 7.30-7.25 (m, 3H), 7.23-7.19 (m, 2H), 6.98 (t,  $J = 1.0$  Hz, 1H), 6.76 - 6.71 (m, 2H), 6.67-6.62 (m, 2H), 4.20 (s, 2H), 3.76 (s, 3H), 3.75 (s, 3H).

$^{13}\text{C NMR}$  (125 MHz, Chloroform-*d*)  $\delta$  188.9, 162.8, 159.5, 148.8, 147.3, 140.2, 139.5, 139.4, 138.5, 132.2, 131.0, 130.4, 128.8, 128.7, 127.8, 127.0, 118.7, 113.9, 113.2, 55.5, 55.4, 37.5.

HRMS (ESI):  $m/z$  calcd for  $(\text{C}_{28}\text{H}_{22}\text{O}_3\text{S}_2+\text{H})^+$ : 471.1083; found: 471.1078.

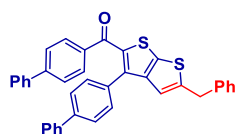

### [1,1'-biphenyl]-4-yl(3-([1,1'-biphenyl]-4-yl)-5-benzylthieno[2,3-b]thiophen-2-yl)methanone (**3c**)

yellow solid; 90 mg (50% yield); m.p.  $81.5\text{-}82.0^\circ\text{C}$ .

$^1\text{H NMR}$  (500 MHz, Chloroform-*d*)  $\delta$  7.59 (d,  $J = 8.0$  Hz, 2H), 7.42-7.24 (m, 21H), 7.01 (s, 1H),

4.21 (s, 2H).

$^{13}\text{C}$  NMR (125 MHz, Chloroform-*d*)  $\delta$  189.7, 149.1, 147.4, 144.7, 141.4, 140.9, 140.4, 140.4, 140.1, 139.3, 139.2, 136.5, 134.1, 130.2, 130.1, 128.8, 128.7, 128.7, 128.6, 127.9, 127.5, 127.3, 127.2, 126.9, 126.9, 126.4, 118.6, 37.4.

HRMS (ESI):  $m/z$  calcd for  $(\text{C}_{38}\text{H}_{26}\text{OS}_2+\text{H})^+$ : 563.1498; found: 563.1491.

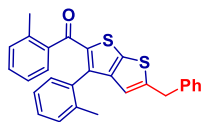

**(5-benzyl-3-(o-tolyl)thieno[2,3-b]thiophen-2-yl)(o-tolyl)methanone (3d)**

white solid; 84 mg (60% yield); m.p. 132.9-133.2 °C.

$^1\text{H}$  NMR (500 MHz, Chloroform-*d*)  $\delta$  7.33-7.28 (m, 2H), 7.26-7.21 (m, 3H), 7.13 (d,  $J = 7.5$  Hz, 1H), 7.09-7.04 (m, 2H), 7.04-6.95 (m, 4H), 6.86 (t,  $J = 7.0$  Hz, 1H), 6.60 (s, 1H), 4.14 (s, 2H), 2.31 (s, 3H), 2.11 (s, 3H).

$^{13}\text{C}$  NMR (125 MHz, Chloroform-*d*)  $\delta$  191.5, 148.9, 148.4, 142.1, 134.0, 139.3, 138.8, 135.9, 135.8, 134.6, 130.3, 129.9, 129.8, 129.6, 128.7, 128.6, 128.0, 127.7, 126.9, 125.2, 124.5, 118.7, 37.4, 20.1, 19.7.

HRMS (ESI):  $m/z$  calcd for  $(\text{C}_{28}\text{H}_{22}\text{OS}_2+\text{H})^+$ : 439.1185; found: 439.1180.

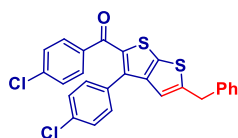

**(5-benzyl-3-(4-chlorophenyl)thieno[2,3-b]thiophen-2-yl)(4-chlorophenyl)methanone (3e)**

yellow solid; 111 mg (73% yield); m.p. 135.3-135.7 °C.

$^1\text{H}$  NMR (500 MHz, Chloroform-*d*)  $\delta$  7.51-7.47 (m, 2H), 7.35-7.30 (m, 2H), 7.26 (m 3H), 7.21-7.13 (m, 6H), 6.90 (s, 1H), 4.20 (s, 2H).

$^{13}\text{C}$  NMR (125 MHz, Chloroform-*d*)  $\delta$  188.5, 149.7, 147.1, 141.4, 139.6, 139.2, 138.6, 138.2, 136.0, 134.3, 133.4, 130.9, 128.8, 128.6, 128.6, 128.2, 127.0, 118.1, 37.4.

HRMS (ESI):  $m/z$  calcd for  $(\text{C}_{26}\text{H}_{16}\text{Cl}_2\text{OS}_2+\text{H})^+$ : 479.0092; found: 479.0093.

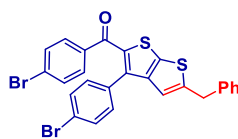

**(5-benzyl-3-(4-bromophenyl)thieno[2,3-b]thiophen-2-yl)(4-bromophenyl)methanone (3f)**

yellow solid; 157 mg (87% yield); m.p. 148.1-149.0 °C.

$^1\text{H}$  NMR (500 MHz, Chloroform-*d*)  $\delta$  7.43-7.38 (m, 2H), 7.38-7.30 (m, 6H), 7.28-7.25 (m, 3H), 7.13-7.08 (m, 2H), 6.90 (t,  $J = 1.0$  Hz, 1H), 4.20 (s, 2H).

$^{13}\text{C}$  NMR (125 MHz, Chloroform-*d*)  $\delta$  188.8, 149.9, 147.2, 141.6, 139.7, 139.2, 138.4, 136.6, 134.0, 131.6, 131.3, 131.2, 131.1, 128.9, 128.7, 127.3, 127.1, 122.7, 118.1, 37.5.

HRMS (ESI):  $m/z$  calcd for  $(\text{C}_{26}\text{H}_{16}\text{Br}_2\text{OS}_2+\text{H})^+$ : 566.9082; found: 566.9083.

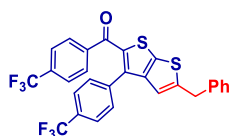

**(5-benzyl-3-(4-(trifluoromethyl)phenyl)thieno[2,3-b]thiophen-2-yl)(4-(trifluoromethyl)phenyl)methanone (3g)**

white solid; 126 mg (72% yield); m.p. 123.5-123.8 °C.

<sup>1</sup>H NMR (500 MHz, Chloroform-*d*) δ 7.56 (d, *J* = 8.0 Hz, 2H), 7.42 (d, *J* = 8.0 Hz, 2H), 7.38 (d, *J* = 8.5 Hz, 2H), 7.36-7.29 (m, 4H), 7.29-7.26 (m, 3H), 6.88 (s, 1H), 4.20 (s, 2H).

<sup>13</sup>C NMR (125 MHz, Chloroform-*d*) δ 188.7, 150.4, 147.4, 142.6, 141.0, 140.5, 139.1, 138.6, 138.6, 133.5 (d, *J* = 33 Hz), 130.5 (q, *J* = 33 Hz), 130.1, 129.5, 129.0, 128.7, 127.2, 125.2 (q, *J* = 3.5 Hz), 124.9 (q, *J* = 3.5 Hz), 122.7, 122.3, 118.0, 37.5.

HRMS (ESI): *m/z* calcd for (C<sub>28</sub>H<sub>16</sub>F<sub>6</sub>OS<sub>2</sub>+H)<sup>+</sup>: 547.0620; found: 547.0611.

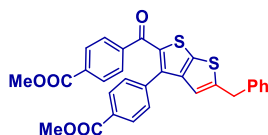

**methyl 4-(5-benzyl-2-(4-(methoxycarbonyl)benzoyl)thieno[2,3-b]thiophen-3-yl)benzoate (3h)**

yellow solid; 112 mg (67% yield); m.p. 140.3-141.1 °C.

<sup>1</sup>H NMR (500 MHz, Chloroform-*d*) δ 7.83 (d, *J* = 8.5 Hz, 2H), 7.79 (d, *J* = 8.0 Hz, 2H), 7.58 (d, *J* = 8.5 Hz, 2H), 7.34-7.30 (m, 4H), 7.27-7.24 (m, 4H), 6.90 (s, 1H), 4.20 (s, 2H), 3.89 (s, 6H).

<sup>13</sup>C NMR (125 MHz, Chloroform-*d*) δ 189.2, 166.6, 166.2, 150.0, 147.3, 142.0, 141.5, 140.2, 139.6, 139.2, 138.7, 132.9, 129.8, 129.7, 129.6, 129.4, 129.2, 128.9, 128.7, 127.1, 118.2, 52.5, 52.3, 37.5.

HRMS (ESI): *m/z* calcd for (C<sub>30</sub>H<sub>22</sub>O<sub>5</sub>S<sub>2</sub>+H)<sup>+</sup>: 527.0981; found: 527.0975.

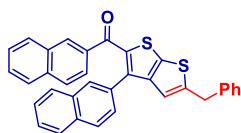

**(5-benzyl-3-(naphthalen-2-yl)thieno[2,3-b]thiophen-2-yl)(naphthalen-2-yl)methanone (3i)**

white solid; 113 mg (69% yield); m.p. 164.2-165.1 °C.

<sup>1</sup>H NMR (500 MHz, Chloroform-*d*) δ 8.11 (s, 1H), 7.78 (s, 1H), 7.70-7.68 (m, 1H), 7.65-7.61 (m, 1H), 7.58-7.55 (m, 3H), 7.51 (d, *J* = 8.5 Hz, 2H), 7.39-7.25 (m, 10H), 7.03 (s, 1H), 4.22 (s, 2H).

<sup>13</sup>C NMR (125 MHz, Chloroform-*d*) δ 189.9, 149.2, 147.6, 141.1, 140.1, 139.6, 139.4, 135.0, 134.8, 132.9, 132.7, 132.5, 131.8, 131.4, 128.9, 128.8, 128.6, 127.9, 127.8, 127.8, 127.7, 127.4, 127.1, 126.9, 126.3, 126.2, 126.1, 125.0, 118.6, 37.4.

HRMS (ESI): *m/z* calcd for (C<sub>34</sub>H<sub>22</sub>OS<sub>2</sub>+H)<sup>+</sup>: 511.1185; found: 511.1181.

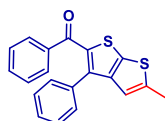

**(5-methyl-3-phenylthieno[2,3-b]thiophen-2-yl)(phenyl)methanone (3k)**

yellow solid; 53 mg (50% yield); m.p. 153.7-153.9 °C.



$^1\text{H}$  NMR (500 MHz, Chloroform-*d*)  $\delta$  7.55-7.53 (m, 2H), 7.28-7.22 (m, 3H), 7.17-7.13 (m, 3H), 7.13-7.09 (m, 2H), 6.87 (q,  $J = 1.0$  Hz, 1H), 2.56 (d,  $J = 1.0$  Hz, 3H).

$^{13}\text{C}$  NMR (125 MHz, Chloroform-*d*)  $\delta$  190.4, 147.8, 144.6, 140.4, 140.1, 139.4, 137.8, 135.3, 131.9, 129.8, 129.6, 128.2, 127.9, 127.8, 118.7, 16.6.

HRMS (ESI):  $m/z$  calcd for  $(\text{C}_{20}\text{H}_{14}\text{OS}_2+\text{H})^+$ : 335.0559; found: 335.0559.

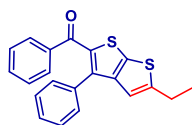

**(5-ethyl-3-phenylthieno[2,3-b]thiophen-2-yl)(phenyl)methanone (3l)**

yellow solid; 66 mg (59% yield); m.p. 150.9-151.4 °C.

$^1\text{H}$  NMR (500 MHz, Chloroform-*d*)  $\delta$  7.57-7.52 (m, 2H), 7.28-7.24 (m, 3H), 7.18-7.15 (m, 3H), 7.13-7.10 (m, 2H), 6.89 (s, 1H), 2.93-2.88 (m, 2H), 1.35 (t,  $J = 7.5$  Hz, 3H).

$^{13}\text{C}$  NMR (125 MHz, Chloroform-*d*)  $\delta$  190.4, 152.4, 147.7, 140.18, 140.1, 139.6, 137.9, 135.4, 131.9, 129.9, 129.6, 128.2, 127.9, 127.8, 116.9, 24.7, 15.9.

HRMS (ESI):  $m/z$  calcd for  $(\text{C}_{20}\text{H}_{14}\text{OS}_2+\text{H})^+$ : 349.0715; found: 349.0715.

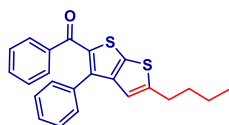

**(5-butyl-3-phenylthieno[2,3-b]thiophen-2-yl)(phenyl)methanone (3m)**

white solid; 66 mg (59% yield); m.p. 93.0-93.2 °C.

$^1\text{H}$  NMR (500 MHz, Chloroform-*d*)  $\delta$  7.56-7.52 (m, 2H), 7.29-7.23 (m, 3H), 7.18-7.14 (m, 3H), 7.11 (t,  $J = 7.5$  Hz, 2H), 6.88 (s, 1H), 2.87 (t,  $J = 7.5$  Hz, 2H), 1.74-1.66 (m, 2H), 1.45-1.37 (m, 2H), 0.94 (t,  $J = 7.5$  Hz, 3H).

$^{13}\text{C}$  NMR (125 MHz, Chloroform-*d*)  $\delta$  190.4, 150.9, 147.6, 140.2, 140.1, 139.5, 137.9, 135.4, 131.9, 129.9, 129, 128.2, 127.9, 127.8, 117.5, 33.8, 31.1, 22.3, 13.9.

HRMS (ESI):  $m/z$  calcd for  $(\text{C}_{23}\text{H}_{20}\text{OS}_2+\text{H})^+$ : 377.1028; found: 377.1020.

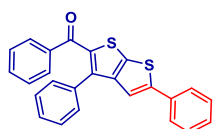

**(3,5-diphenylthieno[2,3-b]thiophen-2-yl)(phenyl)methanone (3n)**

yellow solid; 89 mg (70% yield); m.p. 198.0-198.7 °C.

$^1\text{H}$  NMR (500 MHz, Chloroform-*d*)  $\delta$  7.61-7.56 (m, 4H), 7.43-7.37 (m, 3H), 7.35-7.27 (m, 4H), 7.21-7.18 (m, 3H), 7.13 (t,  $J = 8.0$  Hz, 2H).

$^{13}\text{C}$  NMR (125 MHz, Chloroform-*d*)  $\delta$  190.3, 148.7, 148.5, 141.5, 140.6, 139.8, 137.7, 135.1, 134.3, 132.1, 129.9, 129.7, 129.2, 128.4, 128.4, 128.2, 127.9, 126.1, 116.5.

HRMS (ESI):  $m/z$  calcd for  $(\text{C}_{25}\text{H}_{16}\text{OS}_2+\text{H})^+$ : 397.0715; found: 397.0713.

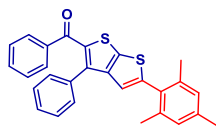

**(5-mesityl-3-phenylthieno[2,3-b]thiophen-2-yl)(phenyl)methanone(3o)**

yellow solid; 133 mg (95% yield); m.p. 209.1-209.9 °C.

<sup>1</sup>H NMR (500 MHz, Chloroform-*d*) δ 7.61-7.59 (m, 2H), 7.31-7.27 (m, 3H), 7.16-7.11 (m, 5H), 6.94-6.93 (m, 3H), 2.32 (s, 3H), 2.20 (s, 6H).

<sup>13</sup>C NMR (125 MHz, Chloroform-*d*) δ 190.5, 147.8, 146.3, 142.1, 140.1, 139.8, 138.8, 138.4, 137.8, 135.2, 132.1, 130.5, 129.9, 129.8, 128.3, 128.3, 128.1, 127.8, 120.1, 21.3, 20.9.

HRMS (ESI): m/z calcd for (C<sub>28</sub>H<sub>22</sub>OS<sub>2</sub>+H)<sup>+</sup>: 439.1185; found: 439.1177.

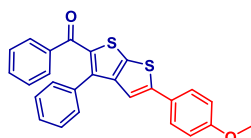

**(5-(4-methoxyphenyl)-3-phenylthieno[2,3-b]thiophen-2-yl)(phenyl)methanone (3p)**

yellow solid; 133 mg (95% yield); m.p. 160.5-161.4 °C.

<sup>1</sup>H NMR (500 MHz, Chloroform-*d*) δ 7.59-7.55 (m, 2H), 7.54-7.51 (m, 2H), 7.31-7.26 (m, 4H), 7.21-7.16 (m, 3H), 7.15-7.11 (m, 2H), 6.95-6.90 (m, 2H), 3.84 (s, 3H).

<sup>13</sup>C NMR (125 MHz, Chloroform-*d*) δ 190.3, 159.9, 148.7, 148.6, 140.8, 140.5, 139.8, 137.8, 135.2, 132.0, 129.9, 129.7, 128.4, 128.1, 127.8, 127.5, 127.1, 115.3, 114.6, 55.5.

HRMS (ESI): m/z calcd for (C<sub>26</sub>H<sub>18</sub>O<sub>2</sub>S<sub>2</sub>+H)<sup>+</sup>: 427.0821; found: 427.0817.

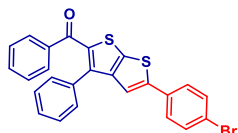

**(5-(4-bromophenyl)-3-phenylthieno[2,3-b]thiophen-2-yl)(phenyl)methanone (3q)**

yellow solid; 107 mg (71% yield); m.p. 208.6-209.0 °C.

<sup>1</sup>H NMR (500 MHz, Chloroform-*d*) δ 7.57-7.54 (m, 2H), 7.53-7.50 (m, 2H), 7.47-7.44 (m, 2H), 7.37 (s, 1H), 7.29-7.27 (m, 3H), 7.21-7.17 (m, 3H), 7.14-7.11 (m, 2H).

<sup>13</sup>C NMR (125 MHz, Chloroform-*d*) δ 190.2, 148.5, 147.3, 141.6, 140.8, 139.8, 137.6, 135.0, 133.3, 132.3, 132.2, 129.8, 129.7, 128.4, 128.2, 127.9, 127.5, 122.3, 116.9.

HRMS (ESI): m/z calcd for (C<sub>25</sub>H<sub>15</sub>BrOS<sub>2</sub>+H)<sup>+</sup>: 474.9820; found: 474.9819.

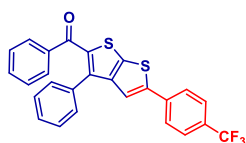

**phenyl(3-phenyl-5-(4-(trifluoromethyl)phenyl)thieno[2,3-b]thiophen-2-yl)methanone (3r)**

white solid; 122 mg (82% yield); m.p. 133.2-133.9 °C.

<sup>1</sup>H NMR (500 MHz, Chloroform-*d*) δ 7.71-7.70 (m, 2H), 7.66-7.64 (m, 2H), 7.59-7.55 (m, 2H), 7.47 (s, 1H), 7.32-7.27 (m, 3H), 7.22-7.19 (m, 3H), 7.16 – 7.11 (m, 2H).

<sup>13</sup>C NMR (125 MHz, Chloroform-*d*) δ 190.3, 148.4, 146.7, 142.2, 141.1, 139.8, 137.6, 137.5, 134.9,

132.2, 129.8, 129.7, 128.5, 128.3, 127.9, 126.2(q,  $J = 3.75\text{Hz}$ ), 126.2, 118.0.

HRMS (ESI):  $m/z$  calcd for  $(\text{C}_{26}\text{H}_{15}\text{F}_3\text{OS}_2+\text{H})^+$ : 465.0589; found: 465.0588.

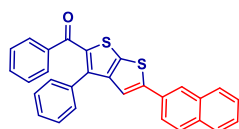

**(5-(naphthalen-2-yl)-3-phenylthieno[2,3-b]thiophen-2-yl)(phenyl)methanone (3s)**

yellow solid; 131 mg (92% yield); m.p. 92.9-93.2 °C.

$^1\text{H}$  NMR (500 MHz, Chloroform-*d*)  $\delta$  8.25-8.19 (m, 1H), 7.94-7.86 (m, 2H), 7.65-7.57 (m, 3H), 7.55-7.49 (m, 3H), 7.35 (s, 1H), 7.34-7.27 (m, 3H), 7.21-7.10 (m, 5H).

$^{13}\text{C}$  NMR (125 MHz, Chloroform-*d*)  $\delta$  190.5, 147.9, 146.1, 142.1, 140.6, 139.9, 137.8, 135.1, 133.9, 132.1, 132.1, 131.9, 129.9, 129.7, 129.4, 128.8, 128.6, 128.4, 128.2, 127.9, 127.0, 126.4, 125.63, 125.3, 121.0.

HRMS (ESI):  $m/z$  calcd for  $(\text{C}_{29}\text{H}_{18}\text{OS}_2+\text{H})^+$ : 447.0872; found: 447.0880.

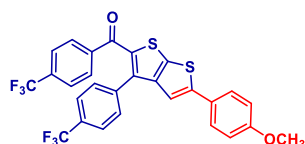

**(5-(4-methoxyphenyl)-3-(4-(trifluoromethyl)phenyl)thieno[2,3-b]thiophen-2-yl)(4-(trifluoromethyl)phenyl)methanone (3t)**

yellow solid; 109 mg (61% yield); m.p. 201.5-201.8 °C.

$^1\text{H}$  NMR (500 MHz, Chloroform-*d*)  $\delta$  7.62-7.57 (m, 2H), 7.54-7.49 (m, 2H), 7.46-7.44 (m, 2H), 7.41-7.39 (m, 2H), 7.37-7.35 (m, 2H), 7.18 (s, 1H), 6.96-6.91 (m, 2H), 3.84 (s, 3H).

$^{13}\text{C}$  NMR (125 MHz, Chloroform-*d*)  $\delta$  188.6, 160.2, 149.8, 148.4, 142.2, 141.0, 140.7, 138.8, 138.6, 133.5 (q,  $J = 33\text{Hz}$ ), 130.7, 130.5 (q,  $J = 33\text{Hz}$ ), 129.6, 127.6, 126.6, 125.3 (q,  $J = 3.6\text{Hz}$ ), 125.0 (q,  $J = 3.6\text{Hz}$ ), 114.7, 114.6, 55.6.

HRMS (ESI):  $m/z$  calcd for  $(\text{C}_{28}\text{H}_{16}\text{F}_6\text{O}_2\text{S}_2+\text{H})^+$ : 563.0569; found: 563.0572.

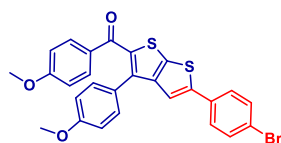

**(5-(4-bromophenyl)-3-(4-methoxyphenyl)thieno[2,3-b]thiophen-2-yl)(4-methoxyphenyl)methanone (3u)**

yellow solid; 124 mg (73% yield); m.p. 144.5-144.9 °C.

$^1\text{H}$  NMR (500 MHz, Chloroform-*d*)  $\delta$  7.65-7.59 (m, 2H), 7.54-7.44 (m, 4H), 7.39 (s, 1H), 7.27-7.23 (m, 2H), 6.79-6.75 (m, 2H), 6.70-6.63 (m, 2H), 3.77-3.76 (m, 6H).

$^{13}\text{C}$  NMR (125 MHz, Chloroform-*d*)  $\delta$  188.9, 163.0, 159.6, 148.3, 146.9, 140.7, 140.1, 138.6, 133.4, 132.3, 132.3, 131.0, 130.2, 127.6, 127.5, 122.2, 116.9, 114.0, 113.3, 55.5, 55.4.

HRMS (ESI):  $m/z$  calcd for  $(\text{C}_{27}\text{H}_{19}\text{BrO}_3\text{S}_2+\text{H})^+$ : 535.0032; found: 535.0026.

### 3) Synthesis and characterization of poly-substituted thiophenes 5

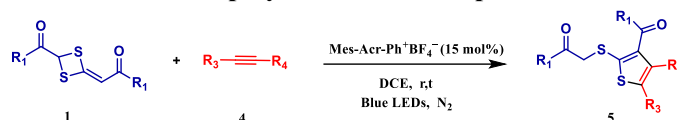

**Typical procedure** (with 5j as an example): The oven-dried schlenk tube (25 mL) was charged with 1,3-dithietanes **1a** (100 mg, 1.0 equiv), Mes-Acr-Ph<sup>+</sup>BF<sub>4</sub><sup>-</sup> (20 mg, 0.2 equiv), 1-phenyl-1-propyne (74 mg, 2.0 equiv) and 2 mL DCE under N<sub>2</sub> atmosphere. The reaction mixture was stirred for 48 h under irradiation using 5 W blue LEDs at room temperature. After the completion of the reaction as indicated by TLC, the organic phase was removed under vacuum. The crude product was purified by silica gel chromatography (PE/EA=75/1) to afford compound **5j**.

**Table S2. Reaction Optimization for the Synthesis of poly-substituted thiophenes 5<sup>a</sup>**

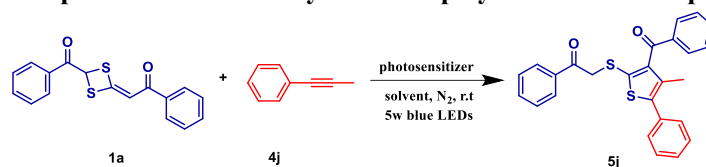

| entry           | 1a:4j      | photosensitizer (mol %)                                     | solvent            | time(h)   | yield (%) <sup>b</sup> |
|-----------------|------------|-------------------------------------------------------------|--------------------|-----------|------------------------|
| 1               | 1:1.2      | Mes-Acr-Ph <sup>+</sup> BF <sub>4</sub> <sup>-</sup> (5)    | DCE                | 48        | 43                     |
| 2               | 1:2        | Mes-Acr-Ph <sup>+</sup> BF <sub>4</sub> <sup>-</sup> (5)    | DCE                | 48        | 47                     |
| 3               | 1:3        | Mes-Acr-Ph <sup>+</sup> BF <sub>4</sub> <sup>-</sup> (5)    | DCE                | 48        | 48                     |
| 4               | 1:2        | Mes-Acr-Ph <sup>+</sup> BF <sub>4</sub> <sup>-</sup> (5)    | DMF                | 48        | 0                      |
| 5               | 1:2        | Mes-Acr-Ph <sup>+</sup> BF <sub>4</sub> <sup>-</sup> (5)    | CH <sub>3</sub> CN | 48        | 0                      |
| 6               | 1:2        | Mes-Acr-Ph <sup>+</sup> BF <sub>4</sub> <sup>-</sup> (5)    | EtOH               | 48        | 0                      |
| 7               | 1:2        | Mes-Acr-Ph <sup>+</sup> BF <sub>4</sub> <sup>-</sup> (5)    | THF                | 48        | 19                     |
| 8               | 1:2        | Mes-Acr-Ph <sup>+</sup> BF <sub>4</sub> <sup>-</sup> (10)   | DCE                | 48        | 56                     |
| <b>9</b>        | <b>1:2</b> | <b>Mes-Acr-Ph<sup>+</sup>BF<sub>4</sub><sup>-</sup>(15)</b> | <b>DCE</b>         | <b>48</b> | <b>62</b>              |
| 10              | 1:2        | Mes-Acr <sup>+</sup> ClO <sub>4</sub> <sup>-</sup> (10)     | DCE                | 48        | 42                     |
| 11              | 1:2        | Ru(bpy) <sub>3</sub> (PF <sub>6</sub> ) <sub>2</sub> (10)   | DCE                | 48        | 0                      |
| 12              | 1:2        | Ir(ppy) <sub>2</sub> (bpy)]PF <sub>6</sub> (10)             | DCE                | 48        | 0                      |
| 13              | 1:2        | Rose Bengal (10)                                            | DCE                | 48        | 0                      |
| 14 <sup>c</sup> | 1:2        | Mes-Acr-Ph <sup>+</sup> BF <sub>4</sub> <sup>-</sup> (10)   | DCE                | 48        | 0                      |
| 15              | 1:2        | –                                                           | DCE                | 48        | 0                      |

<sup>a</sup> Reaction conditions: 1,3-dithietane **1a** (0.32 mmol), alkynes **4j**, and photocatalyst in solvent (2.0 mL) under irradiation using 5 W blue LEDs at room temperature under a N<sub>2</sub> atmosphere.

<sup>b</sup> Isolated yield; yields were calculated based on **1a**.

<sup>c</sup> Under air.

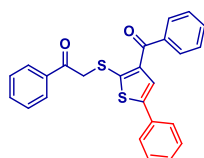

#### 2-((3-benzoyl-5-phenylthiophen-2-yl)thio)-1-phenylethan-1-one (**5a**)

brown oil; 80 mg (60% yield);

<sup>1</sup>H NMR (500 MHz, Chloroform-*d*) δ 7.99-7.97 (m, 2H), 7.84-7.81 (m, 2H), 7.60-7.56 (m, 2H), 7.51-7.46 (m, 6H), 7.39-7.36 (m, 3H), 7.32-7.30 (m, 1H), 4.52 (s, 2H).

<sup>13</sup>C NMR (125 MHz, Chloroform-*d*) δ 193.4, 190.6, 143.6, 143.3, 140.5, 138.6, 135.5, 133.9, 133.1, 132.7, 129.6, 129.2, 128.9, 128.8, 128.6, 128.4, 125.9, 125.4, 44.2.

HRMS (ESI): *m/z* calcd for (C<sub>25</sub>H<sub>18</sub>O<sub>2</sub>S<sub>2</sub>+H)<sup>+</sup>: 415.0821; found: 415.0818.

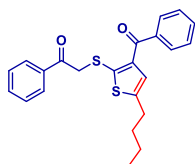

**2-((3-benzoyl-5-butylthiophen-2-yl)thio)-1-phenylethan-1-one (5b)**

brown oil; 61 mg (48% yield);

$^1\text{H}$  NMR (500 MHz, Chloroform-*d*)  $\delta$  7.94 (dd,  $J = 8.5, 1.0$  Hz, 2H), 7.79-7.73 (m, 2H), 7.58-7.51 (m, 2H), 7.46-7.40 (m, 4H), 6.87 (s, 1H), 4.41 (s, 2H), 2.72 (t,  $J = 7.5$  Hz, 2H), 1.63-1.57 (m, 2H), 1.41-1.32 (m, 2H), 0.91 (t,  $J = 7.0$  Hz, 3H).

$^{13}\text{C}$  NMR (125 MHz, Chloroform-*d*)  $\delta$  193.6, 190.6, 146.0, 140.4, 139.9, 138.6, 135.5, 133.7, 132.4, 129.5, 128.7, 128.8, 128.4, 126.8, 44.1, 33.4, 29.9, 22.1, 13.8

HRMS (ESI):  $m/z$  calcd for  $(\text{C}_{23}\text{H}_{22}\text{O}_2\text{S}_2+\text{H})^+$ : 395.1134; found: 395.1137.

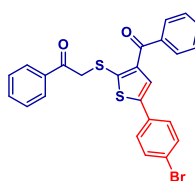

**2-((3-benzoyl-5-(4-bromophenyl)thiophen-2-yl)thio)-1-phenylethan-1-one (5c)**

yellow solid; 103 mg (66% yield); m.p. 131.6-132.4 °C.

$^1\text{H}$  NMR (500 MHz, Chloroform-*d*)  $\delta$  8.00-7.95 (m, 2H), 7.82-7.79 (m, 2H), 7.61-7.57 (m, 2H), 7.51-7.47 (m, 6H), 7.38-7.35 (m, 3H), 4.51 (s, 2H).

$^{13}\text{C}$  NMR (125 MHz, Chloroform-*d*)  $\delta$  193.2, 190.5, 144.1, 142.0, 140.4, 138.5, 135.4, 134.0, 132.8, 132.3, 132.1, 129.6, 128.9, 128.8, 128.6, 127.3, 125.8, 122.3, 44.1.

HRMS (ESI):  $m/z$  calcd for  $(\text{C}_{25}\text{H}_{17}\text{BrO}_2\text{S}_2+\text{H})^+$ : 492.9926; found: 492.9928.

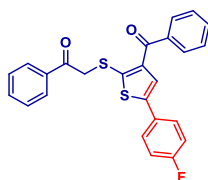

**2-((3-benzoyl-5-(4-fluorophenyl)thiophen-2-yl)thio)-1-phenylethan-1-one (5d)**

yellow solid; 91 mg (66% yield); m.p. 118.4-118.9 °C.

$^1\text{H}$  NMR (500 MHz, Chloroform-*d*)  $\delta$  7.97 (dd,  $J = 8.5, 1.5$  Hz, 2H), 7.81 (dd,  $J = 8.5, 1.5$  Hz, 2H), 7.61-7.55 (m, 2H), 7.51-7.44 (m, 6H), 7.31 (s, 1H), 7.09-7.03 (m, 2H), 4.50 (s, 2H).

$^{13}\text{C}$  NMR (125 MHz, Chloroform-*d*)  $\delta$  193.3, 190.6, 162.8 (d,  $J = 247.1$  Hz), 143.1, 142.5, 140.6, 138.5, 135.4, 133.9, 132.7, 129.6, 129.4 (d,  $J = 3.9$  Hz), 128.9 (d,  $J = 15.4$  Hz), 128.6, 127.7 (d,  $J = 8.1$  Hz), 125.4, 116.3, 116.1, 44.1.

HRMS (ESI):  $m/z$  calcd for  $(\text{C}_{25}\text{H}_{17}\text{FO}_2\text{S}_2+\text{Na})^+$ : 455.0546; found: 455.0551.

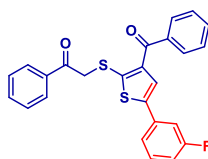

**2-((3-benzoyl-5-(3-fluorophenyl)thiophen-2-yl)thio)-1-phenylethan-1-one (5e)**

yellow solid; 87 mg (63% yield); m.p. 107.3-108.1 °C.

<sup>1</sup>H NMR (500 MHz, Chloroform-*d*) δ 8.03-7.95 (m, 2H), 7.84-7.78 (m, 2H), 7.62-7.56 (m, 2H), 7.51-7.46 (m, 4H), 7.35-7.31(m, 1H), 7.29-7.27 (m, 1H), 7.21-7.17 (m, 1H), 7.02-6.98 (m, 1H), 4.53 (s, 2H).

<sup>13</sup>C NMR (125 MHz, Chloroform-*d*) δ 193.2, 190.4, 163.2(d, *J* = 245.2 Hz), 144.6, 141.7, 140.1, 138.5, 135.4, 135.2 (d, *J* = 8.2 Hz), 133.9, 132.7, 130.8 (d, *J* = 8.7 Hz), 129.6, 128.9 (d, *J* = 19.5 Hz), 128.6, 126.1, 121.5 (d, *J* = 2.6 Hz), 115.3(d, *J* = 21.1Hz), 112.8, 112.6, 44.1.

HRMS (ESI): m/z calcd for (C<sub>25</sub>H<sub>17</sub>FO<sub>2</sub>S<sub>2</sub>+H)<sup>+</sup>: 455.0546; found: 455.0551.

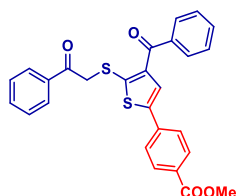

**methyl 4-(4-benzoyl-5-((2-oxo-2-phenylethyl)thio)thiophen-2-yl)benzoate (5g)**

yellow solid; 94 mg (63% yield); m.p. 128.1-128.9 °C.

<sup>1</sup>H NMR (500 MHz, Chloroform-*d*) δ 7.92-7.90 (m, 2H), 7.73-7.66 (m, 2H), 7.58-7.53 (m, 1H), 7.45-7.39 (m, 3H), 7.31-7.27 (m, 2H), 7.24-7.20 (m, 3H), 7.18-7.15 (m, 2H), 7.08-7.01 (m, 5H), 4.32 (s, 2H).

<sup>13</sup>C NMR (125 MHz, Chloroform-*d*) δ 194.5, 194.0, 148.1, 144.2, 137.9, 137.3, 135.5, 134.6, 133.7, 133.5, 133.0, 130.7, 130.0, 129.9, 129.3, 128.8, 128.8, 128.6, 128.4, 128.4, 128.1, 127.5, 45.6.

HRMS (ESI): m/z calcd for (C<sub>27</sub>H<sub>20</sub>O<sub>4</sub>S<sub>2</sub>+H)<sup>+</sup>: 473.0876; found: 473.0873.

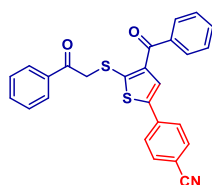

**4-(4-benzoyl-5-((2-oxo-2-phenylethyl)thio)thiophen-2-yl)benzotrile (5h)**

yellow solid; 70 mg (50% yield); m.p. 143.2-144.4 °C.

<sup>1</sup>H NMR (500 MHz, Chloroform-*d*) δ 8.00-7.98 (m, 2H), 7.80-7.79 (m, 2H), 7.65-7.57 (m, 6H), 7.52-7.48 (m, 4H), 7.47 (s, 1H), 4.54 (s, 2H).

<sup>13</sup>C NMR (125 MHz, Chloroform-*d*) δ 192.8, 190.1, 147.0, 140.1, 139.6, 138.3, 137.2, 135.2, 134.0, 132.9, 132.7, 129.37, 128.90, 128.7, 128.6, 127.3, 125.9, 118.6, 111.3, 43.8.

HRMS (ESI): m/z calcd for (C<sub>26</sub>H<sub>17</sub>NO<sub>2</sub>S<sub>2</sub>+H)<sup>+</sup>: 440.0773; found: 440.0772.

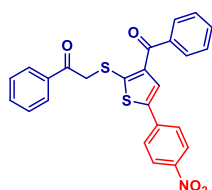

**2-((3-benzoyl-5-(4-nitrophenyl)thiophen-2-yl)thio)-1-phenylethan-1-one (5i)**

yellow solid; 31 mg (21% yield); m.p. 85.5-86.7 °C.

$^1\text{H}$  NMR (500 MHz, Chloroform-*d*)  $\delta$  8.23-8.21 (m, 2H), 8.00-7.99 (m, 2H), 7.81-7.80 (m, 2H), 7.64-7.59 (m, 4H), 7.56 (s, 1H), 7.51-7.49 (m, 4H), 4.56 (s, 2H).

$^{13}\text{C}$  NMR (125 MHz, Chloroform-*d*)  $\delta$  192.8, 190.2, 148.1, 147.1, 139.6, 139.5, 139.2, 138.4, 135.3, 134.1, 132.9, 129.5, 129.0, 128.8, 128.7, 127.9, 126.0, 124.7, 43.8.

HRMS (ESI):  $m/z$  calcd for  $(\text{C}_{25}\text{H}_{17}\text{NO}_4\text{S}_2+\text{H})^+$ : 460.0672; found: 460.0676.

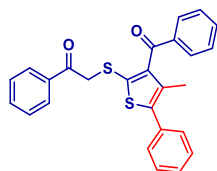

### 2-((3-benzoyl-4-methyl-5-phenylthiophen-2-yl)thio)-1-phenylethan-1-one (5j)

brown oil; 78 mg (57% yield);

$^1\text{H}$  NMR (500 MHz, Chloroform-*d*)  $\delta$  7.90-7.83 (m, 4H), 7.62-7.58 (m, 1H), 7.56-7.53 (m, 1H), 7.50-7.46 (m, 2H), 7.44-7.40 (m, 6H), 7.38-7.35 (m, 1H), 4.23 (s, 2H), 2.07 (s, 3H).

$^{13}\text{C}$  NMR (125 MHz, Chloroform-*d*)  $\delta$  194.8, 193.8, 147.8, 143.4, 137.5, 135.5, 133.9, 133.7, 133.36, 132.5, 130.4, 130.0, 129.4, 128.9, 128.8, 128.8, 128.7, 128.2, 45.7, 14.3.

HRMS (ESI):  $m/z$  calcd for  $(\text{C}_{26}\text{H}_{20}\text{O}_2\text{S}_2+\text{Na})^+$ : 451.0797; found: 451.0797.

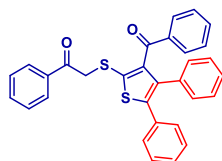

### 2-((3-benzoyl-4,5-diphenylthiophen-2-yl)thio)-1-phenylethan-1-one (5k)

yellow solid; 50 mg (32% yield); m.p. 61.2-61.7 °C.

$^1\text{H}$  NMR (500 MHz, Chloroform-*d*)  $\delta$  7.92-7.90 (m, 2H), 7.73-7.66 (m, 2H), 7.58-7.53 (m, 1H), 7.45-7.39 (m, 3H), 7.31-7.27 (m, 2H), 7.24-7.20 (m, 3H), 7.18-7.15 (m, 2H), 7.08-7.01 (m, 5H), 4.32 (s, 2H).

$^{13}\text{C}$  NMR (125 MHz, Chloroform-*d*)  $\delta$  194.5, 194.0, 148.1, 144.2, 137.9, 137.3, 135.5, 134.6, 133.7, 133.5, 133.0, 130.7, 130.0, 129.9, 129.3, 128.8, 128.8, 128.6, 128.4, 128.4, 128.1, 127.5, 45.6.

HRMS (ESI):  $m/z$  calcd for  $(\text{C}_{31}\text{H}_{22}\text{O}_2\text{S}_2+\text{H})^+$ : 491.1134; found: 491.1133.

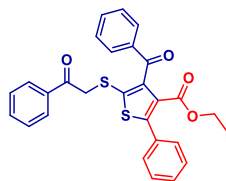

### 2-((3-benzoyl-5-(4-nitrophenyl)thiophen-2-yl)thio)-1-phenylethan-1-one (5l)

yellow oil; 44 mg (30% yield);

$^1\text{H}$  NMR (500 MHz, Chloroform-*d*)  $\delta$  7.90-7.84 (m, 4H), 7.58-7.54 (m, 2H), 7.47-7.44 (m, 5H), 7.42-7.40 (m, 5H), 4.32 (s, 2H), 3.84 (d,  $J = 7.0$  Hz, 2H), 0.81 (t,  $J = 7.0$  Hz, 3H).

$^{13}\text{C}$  NMR (125MHz, Chloroform-*d*)  $\delta$  193.7, 192.7, 162.0, 154.2, 147.8, 137.4, 135.4, 133.8, 133.6, 132.1, 131.4, 129.7, 129.5, 129.3, 128.8, 128.7, 128.7, 128.3, 61.2, 45.6, 13.3.

HRMS (ESI):  $m/z$  calcd for  $(\text{C}_{28}\text{H}_{22}\text{O}_4\text{S}_2+\text{H})^+$ : 487.1032; found: 487.1032.

### III. X-ray Crystallography Data of 1a (CCDC No. 2284367)

Single crystals of compound **1a** was measured on a Bruker APEX-II CCD single-crystal diffractometer. The recrystallization solvent of **1a** was MeOH.

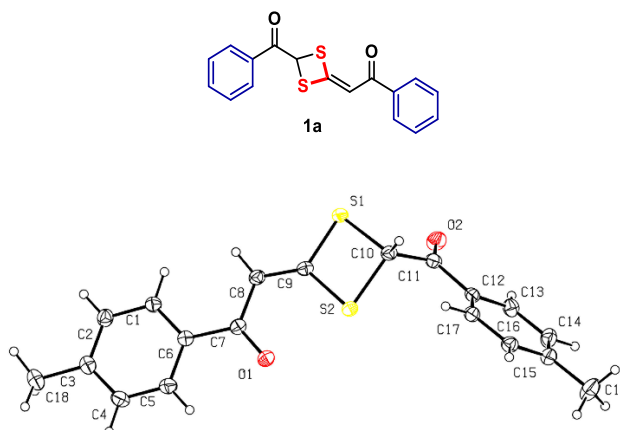

Figure S1 X-ray crystallography of 1a

Table S3 X-ray crystallography data of 1a.

|                                             |                                                               |
|---------------------------------------------|---------------------------------------------------------------|
| Empirical formula                           | C <sub>19</sub> H <sub>16</sub> O <sub>2</sub> S <sub>2</sub> |
| Formula weight                              | 340.44                                                        |
| Temperature/K                               | 170.0                                                         |
| Crystal system                              | monoclinic                                                    |
| Space group                                 | P2 <sub>1</sub> /n                                            |
| a/Å                                         | 12.302(5)                                                     |
| b/Å                                         | 10.967(3)                                                     |
| c/Å                                         | 13.148(4)                                                     |
| α/°                                         | 90                                                            |
| β/°                                         | 111.025(12)                                                   |
| γ/°                                         | 90                                                            |
| Volume/Å <sup>3</sup>                       | 1655.8(9)                                                     |
| Z                                           | 4                                                             |
| ρ <sub>calc</sub> /cm <sup>3</sup>          | 1.366                                                         |
| μ/mm <sup>-1</sup>                          | 0.328                                                         |
| F(000)                                      | 712.0                                                         |
| Crystal size/mm <sup>3</sup>                | 0.42 × 0.08 × 0.035                                           |
| Radiation                                   | MoKα (λ = 0.71073)                                            |
| 2θ range for data collection/°              | 4.982 to 54.228                                               |
| Index ranges                                | -15 ≤ h ≤ 15, -12 ≤ k ≤ 14, -16 ≤ l ≤ 16                      |
| Reflections collected                       | 12981                                                         |
| Independent reflections                     | 3649 [R <sub>int</sub> = 0.0327, R <sub>sigma</sub> = 0.0324] |
| Data/restraints/parameters                  | 3649/0/210                                                    |
| Goodness-of-fit on F <sup>2</sup>           | 1.048                                                         |
| Final R indexes [I ≥ 2σ (I)]                | R <sub>1</sub> = 0.0346, wR <sub>2</sub> = 0.0856             |
| Final R indexes [all data]                  | R <sub>1</sub> = 0.0420, wR <sub>2</sub> = 0.0903             |
| Largest diff. peak/hole / e Å <sup>-3</sup> | 0.29/-0.25                                                    |



#### IV. X-ray Crystallography Data of 3a (CCDC No. 2284471)

Single crystals of compound **3a** was measured on a Bruker APEX-II CCD single-crystal diffractometer. The recrystallization solvent of **3a** was DCM.

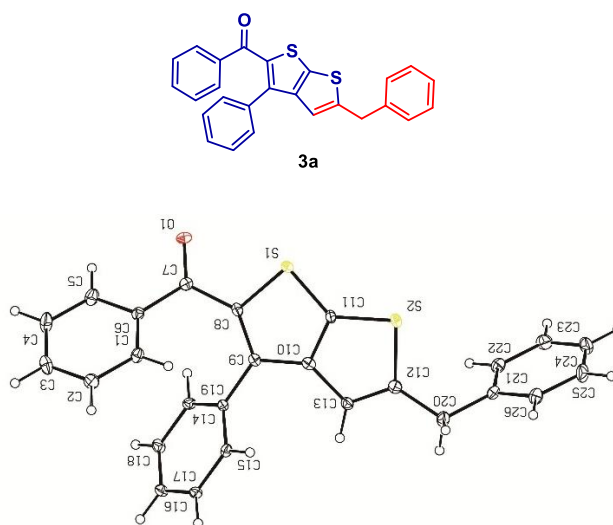

Figure S2 X-ray crystallography of **3a**

Table S4 X-ray crystallography data of **3a**.

|                                             |                                                               |
|---------------------------------------------|---------------------------------------------------------------|
| Empirical formula                           | C <sub>26</sub> H <sub>18</sub> OS <sub>2</sub>               |
| Formula weight                              | 410.52                                                        |
| Temperature/K                               | 170.00                                                        |
| Crystal system                              | monoclinic                                                    |
| Space group                                 | C2/c                                                          |
| a/Å                                         | 18.529(4)                                                     |
| b/Å                                         | 6.3197(16)                                                    |
| c/Å                                         | 33.942(8)                                                     |
| α/°                                         | 90                                                            |
| β/°                                         | 99.181(9)                                                     |
| γ/°                                         | 90                                                            |
| Volume/Å <sup>3</sup>                       | 3923.6(17)                                                    |
| Z                                           | 8                                                             |
| ρ <sub>calc</sub> /cm <sup>3</sup>          | 1.390                                                         |
| μ/mm <sup>-1</sup>                          | 1.688                                                         |
| F(000)                                      | 1712.0                                                        |
| Crystal size/mm <sup>3</sup>                | 0.07 × 0.02 × 0.02                                            |
| Radiation                                   | GaKα (λ = 1.34139)                                            |
| 2θ range for data collection/°              | 4.588 to 118.536                                              |
| Index ranges                                | -23 ≤ h ≤ 16, -7 ≤ k ≤ 8, -42 ≤ l ≤ 43                        |
| Reflections collected                       | 16777                                                         |
| Independent reflections                     | 4286 [R <sub>int</sub> = 0.0963, R <sub>sigma</sub> = 0.0827] |
| Data/restraints/parameters                  | 4286/0/262                                                    |
| Goodness-of-fit on F <sup>2</sup>           | 1.070                                                         |
| Final R indexes [I ≥ 2σ (I)]                | R <sub>1</sub> = 0.0562, wR <sub>2</sub> = 0.1209             |
| Final R indexes [all data]                  | R <sub>1</sub> = 0.0855, wR <sub>2</sub> = 0.1294             |
| Largest diff. peak/hole / e Å <sup>-3</sup> | 0.33/-0.34                                                    |

## V. X-ray Crystallography Data of 5e (CCDC No. 2284470)

Single crystals of compound **5e** was measured on a Bruker APEX-II CCD single-crystal diffractometer. The recrystallization solvent of **5e** was DCM.

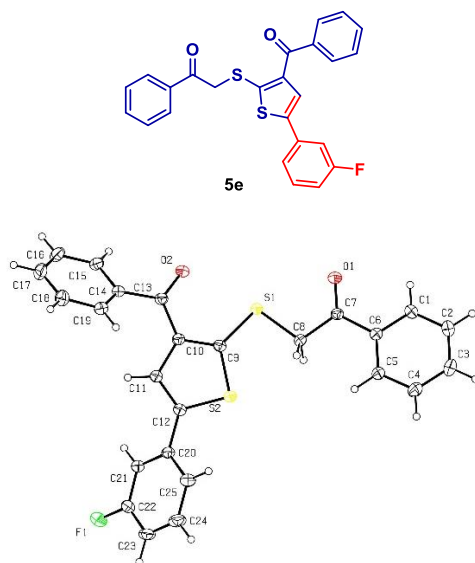

Figure S3 X-ray crystallography of **5e**

Table S5 X-ray crystallography data of **5e**.

|                                             |                                                                |
|---------------------------------------------|----------------------------------------------------------------|
| Empirical formula                           | C <sub>25</sub> H <sub>17</sub> FO <sub>2</sub> S <sub>2</sub> |
| Formula weight                              | 432.50                                                         |
| Temperature/K                               | 170.0                                                          |
| Crystal system                              | triclinic                                                      |
| Space group                                 | P-1                                                            |
| a/Å                                         | 8.1146(11)                                                     |
| b/Å                                         | 13.3076(16)                                                    |
| c/Å                                         | 19.949(2)                                                      |
| $\alpha$ /°                                 | 79.440(4)                                                      |
| $\beta$ /°                                  | 82.471(5)                                                      |
| $\gamma$ /°                                 | 81.303(5)                                                      |
| Volume/Å <sup>3</sup>                       | 2081.5(4)                                                      |
| Z                                           | 4                                                              |
| $\rho_{\text{calc}}/\text{cm}^3$            | 1.380                                                          |
| $\mu/\text{mm}^{-1}$                        | 0.284                                                          |
| F(000)                                      | 896.0                                                          |
| Crystal size/mm <sup>3</sup>                | 0.48 × 0.35 × 0.25                                             |
| Radiation                                   | MoK $\alpha$ ( $\lambda$ = 0.71073)                            |
| 2 $\theta$ range for data collection/°      | 4.052 to 53.606                                                |
| Index ranges                                | -10 ≤ h ≤ 10, -16 ≤ k ≤ 16, -25 ≤ l ≤ 24                       |
| Reflections collected                       | 38993                                                          |
| Independent reflections                     | 8852 [R <sub>int</sub> = 0.0572, R <sub>sigma</sub> = 0.0460]  |
| Data/restraints/parameters                  | 8852/0/541                                                     |
| Goodness-of-fit on F <sup>2</sup>           | 1.027                                                          |
| Final R indexes [I ≥ 2 $\sigma$ (I)]        | R <sub>1</sub> = 0.0433, wR <sub>2</sub> = 0.1041              |
| Final R indexes [all data]                  | R <sub>1</sub> = 0.0652, wR <sub>2</sub> = 0.1178              |
| Largest diff. peak/hole / e Å <sup>-3</sup> | 0.42/-0.33                                                     |

## VI. <sup>1</sup>H NMR and <sup>13</sup>C NMR Spectra of Starting Material

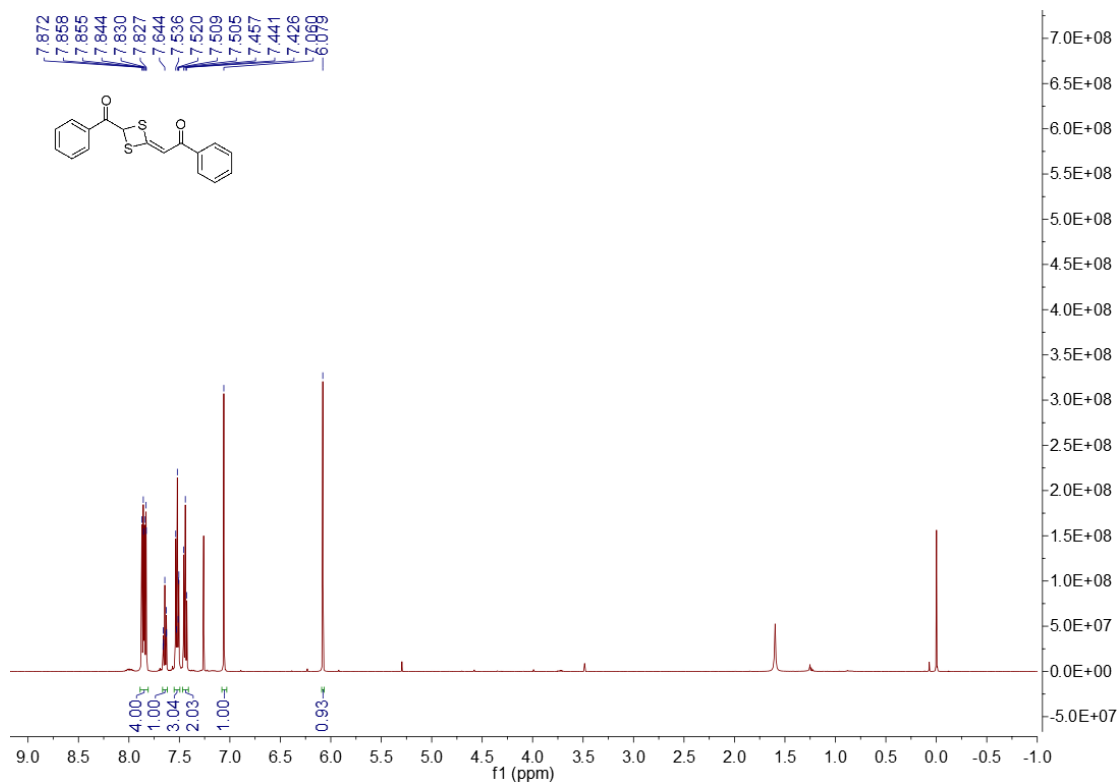

<sup>1</sup>H NMR Spectrum of 1a (CDCl<sub>3</sub>, 500 MHz)

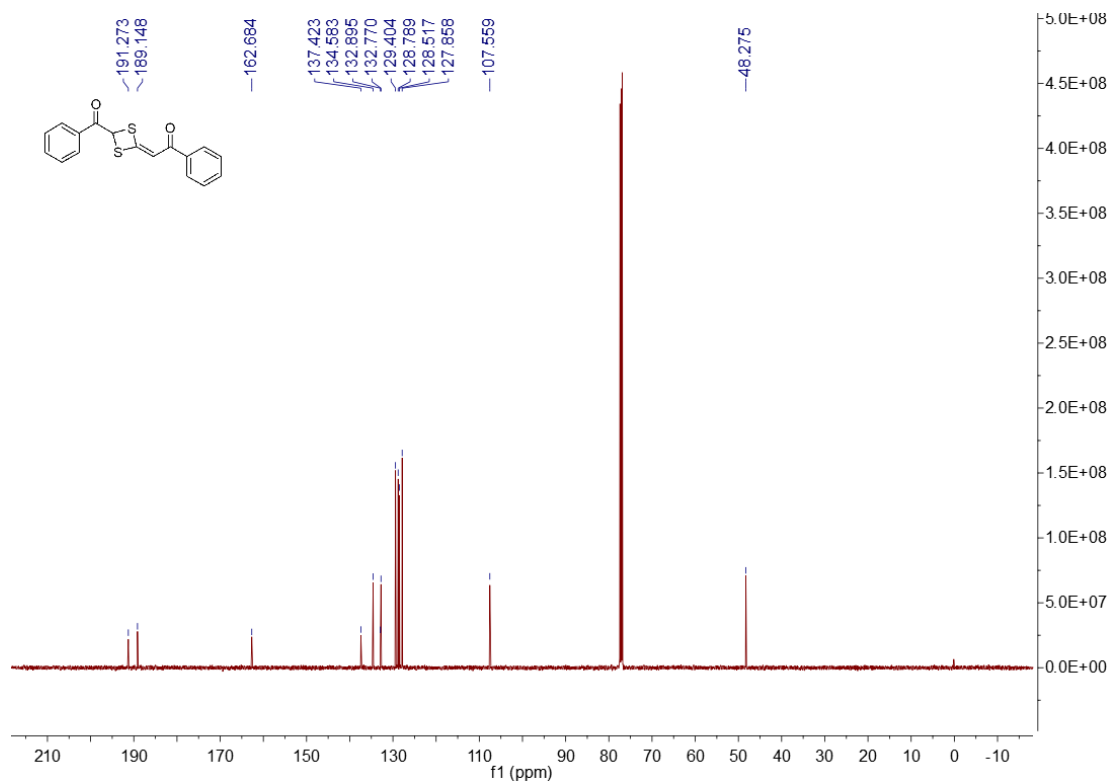

<sup>13</sup>C NMR Spectrum of 1a (CDCl<sub>3</sub>, 125 MHz)

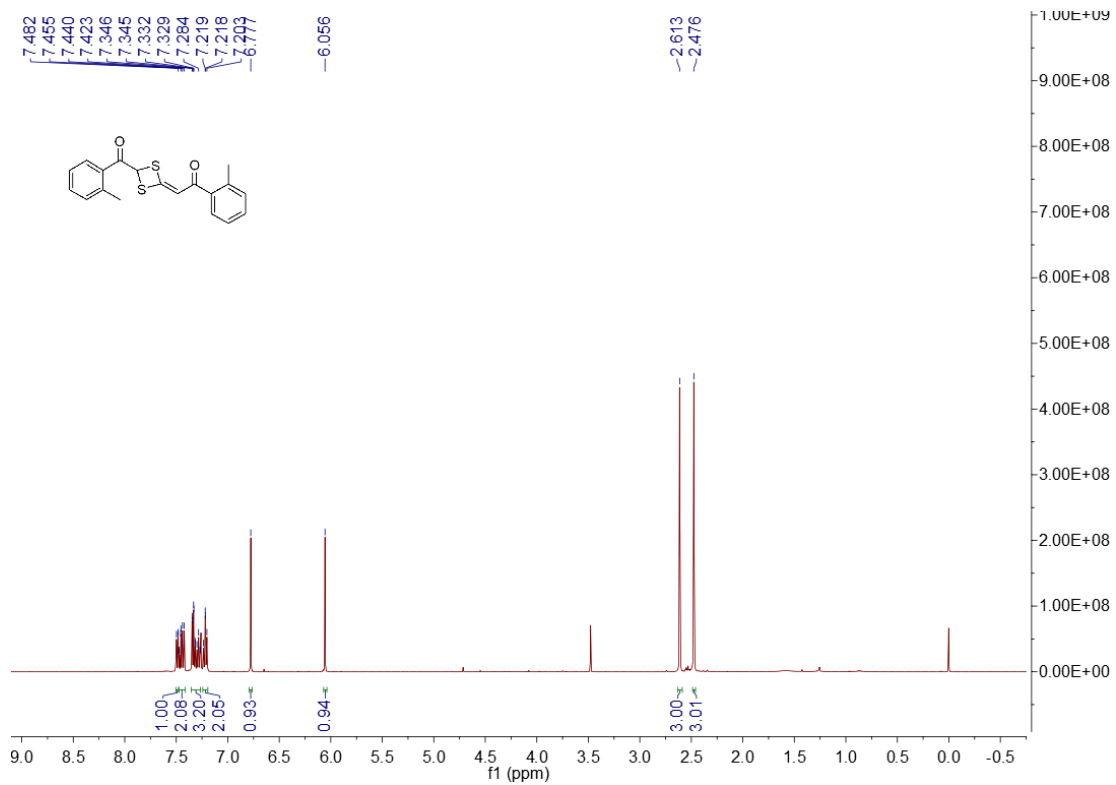

<sup>1</sup>H NMR Spectrum of 1b (CDCl<sub>3</sub>, 500 MHz)

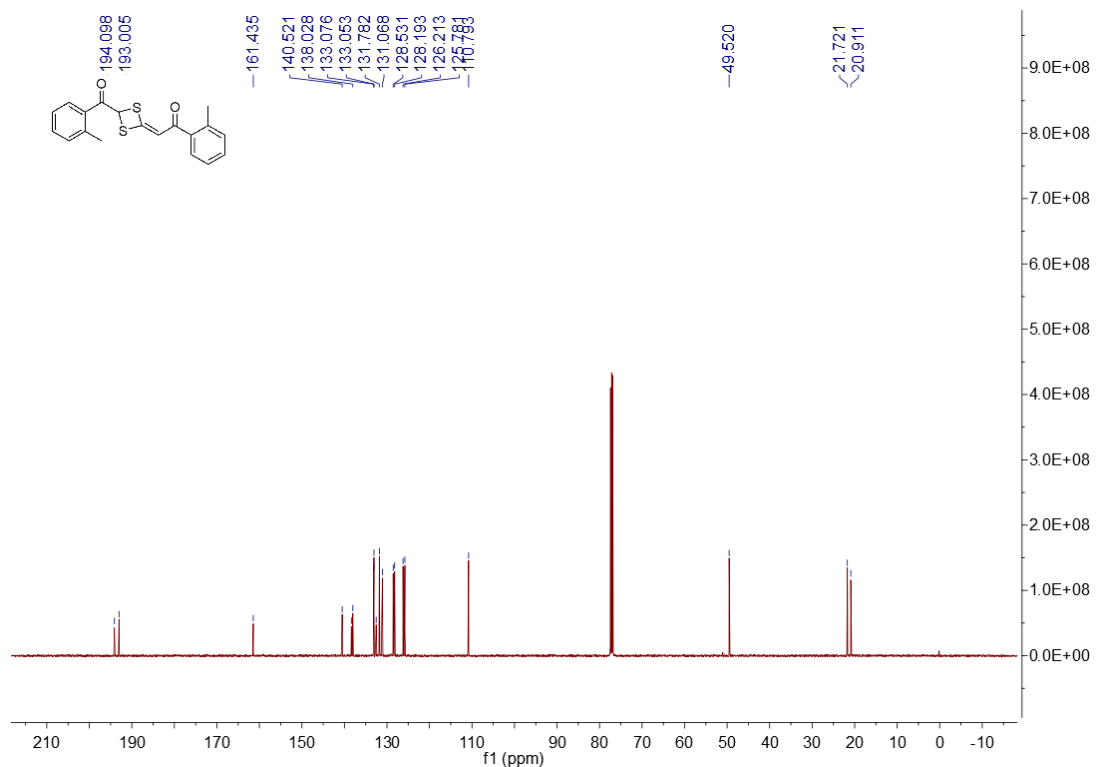

<sup>13</sup>C NMR Spectrum of 1b (CDCl<sub>3</sub>, 125 MHz)

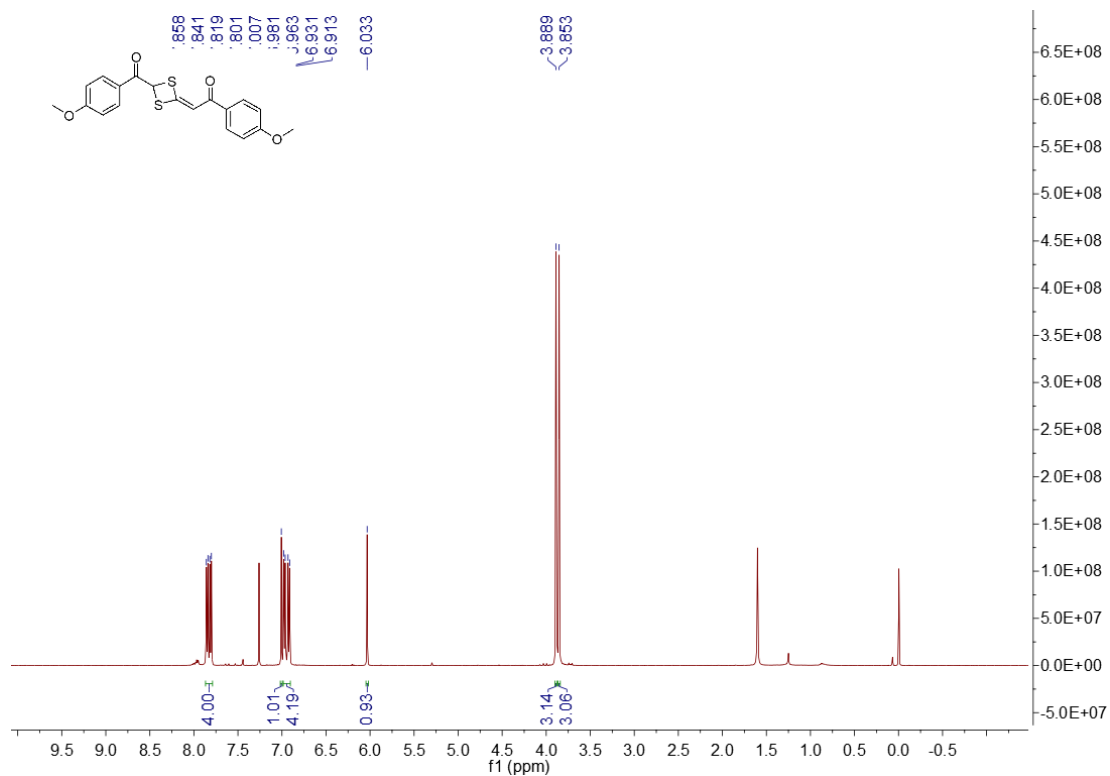

<sup>1</sup>H NMR Spectrum of 1c (CDCl<sub>3</sub>, 500 MHz)

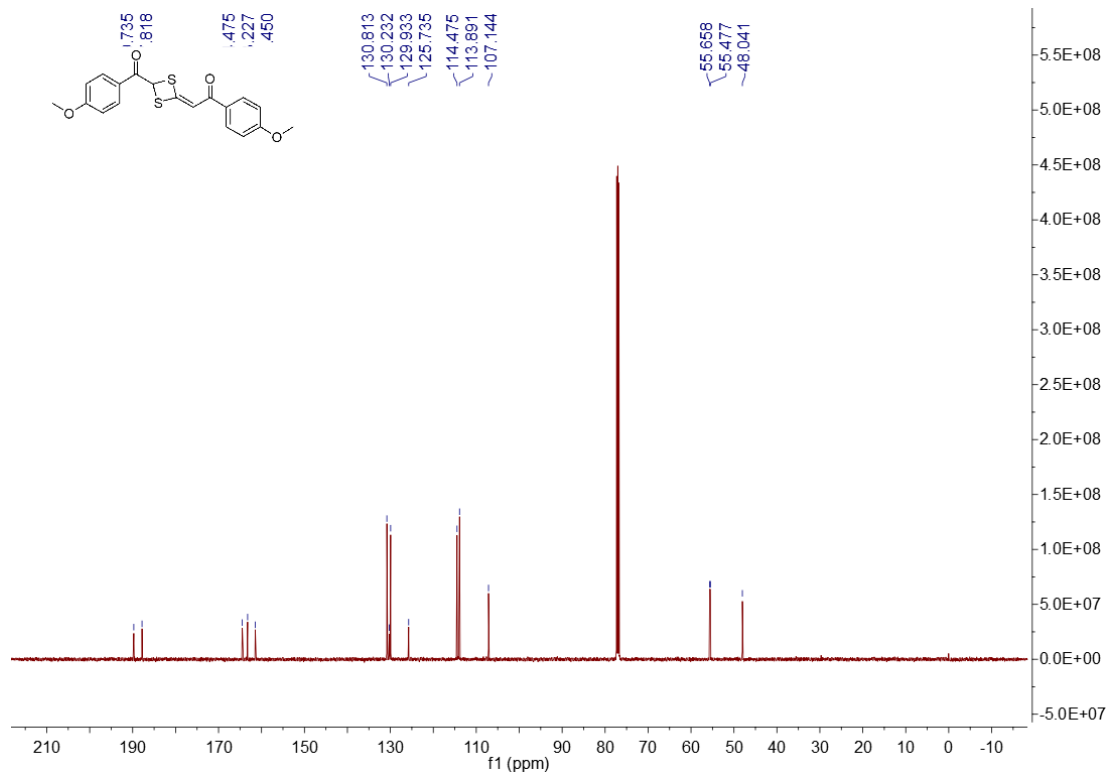

<sup>13</sup>C NMR Spectrum of 1c (CDCl<sub>3</sub>, 125 MHz)

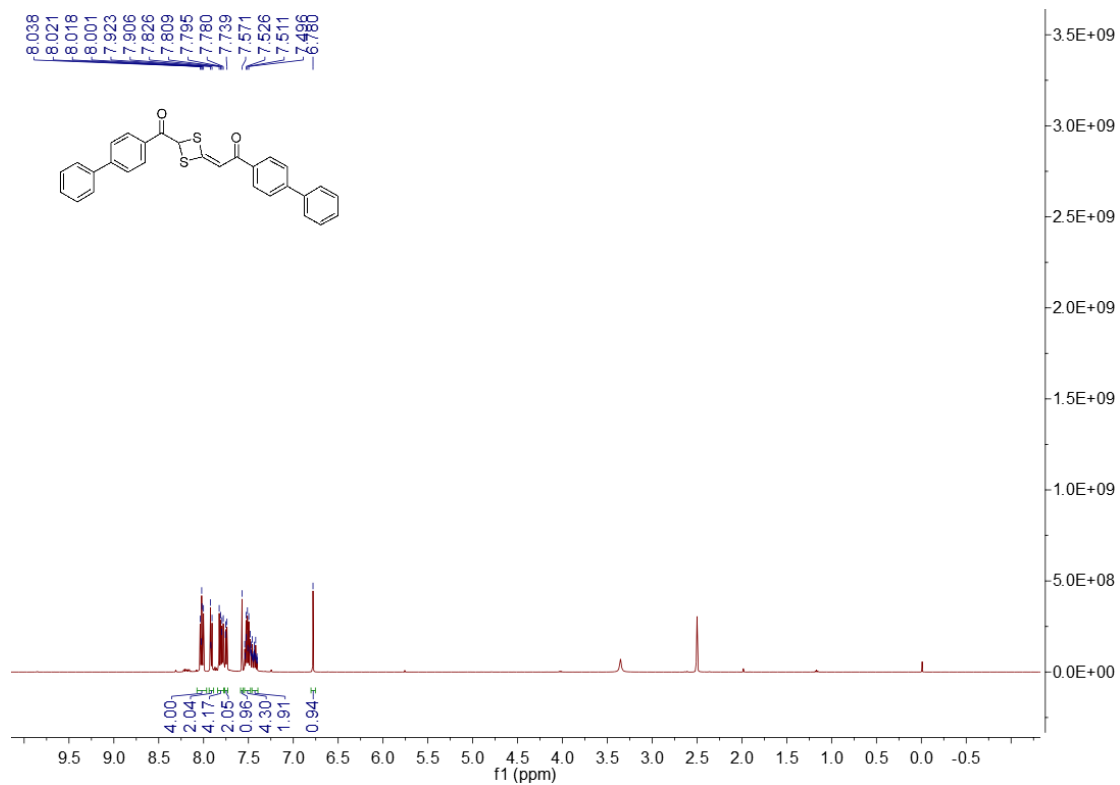

<sup>1</sup>H NMR Spectrum of 1d (DMSO-*d*<sub>6</sub>), 500 MHz

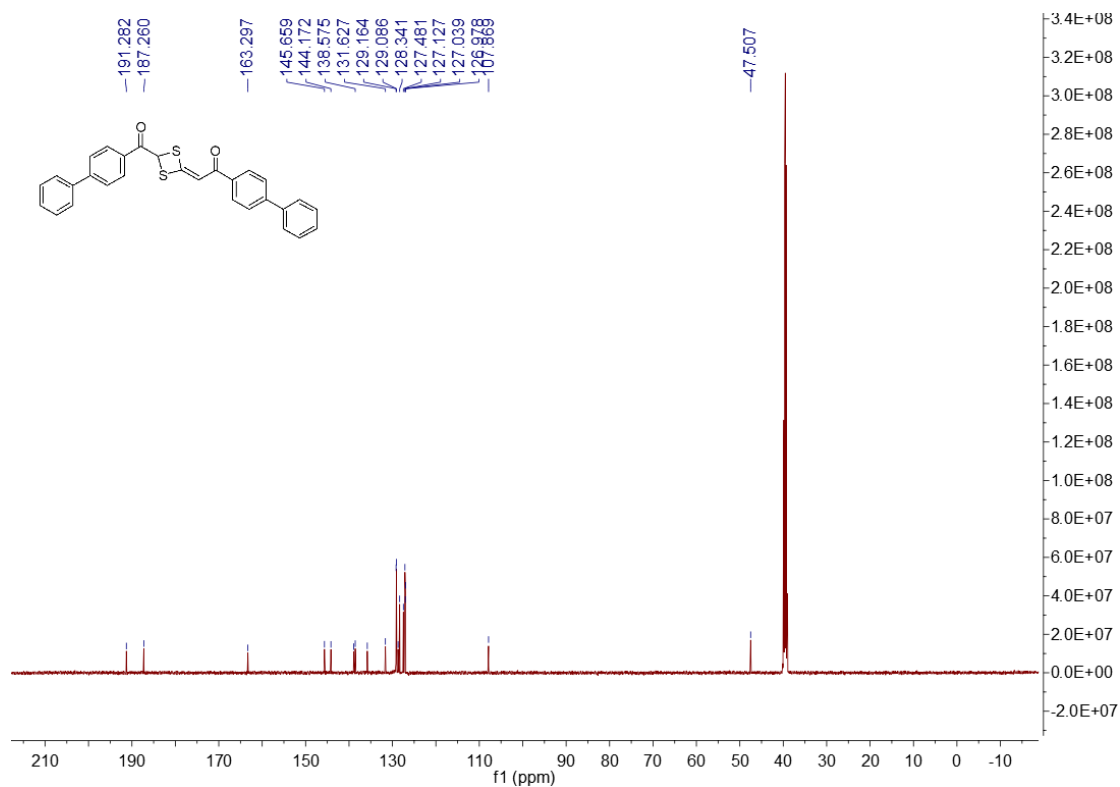

<sup>13</sup>C NMR Spectrum of 1d (DMSO-*d*<sub>6</sub>), 125 MHz

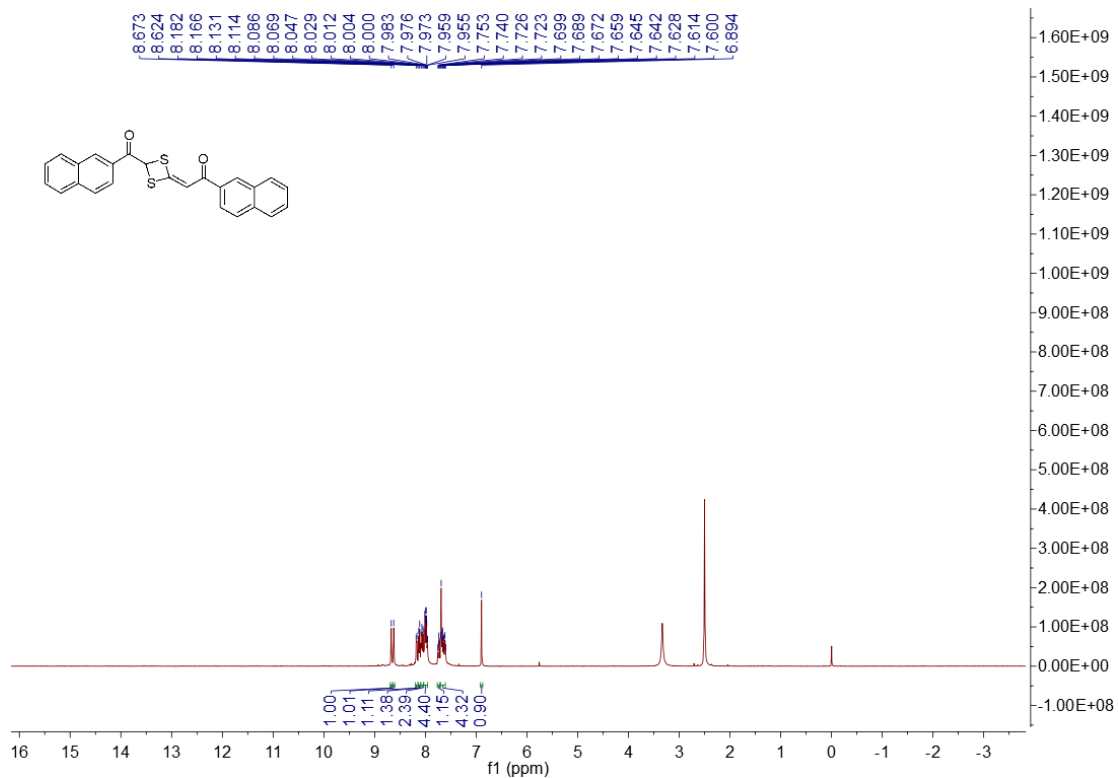

<sup>1</sup>H NMR Spectrum of 1e (DMSO-*d*<sub>6</sub>), 500 MHz

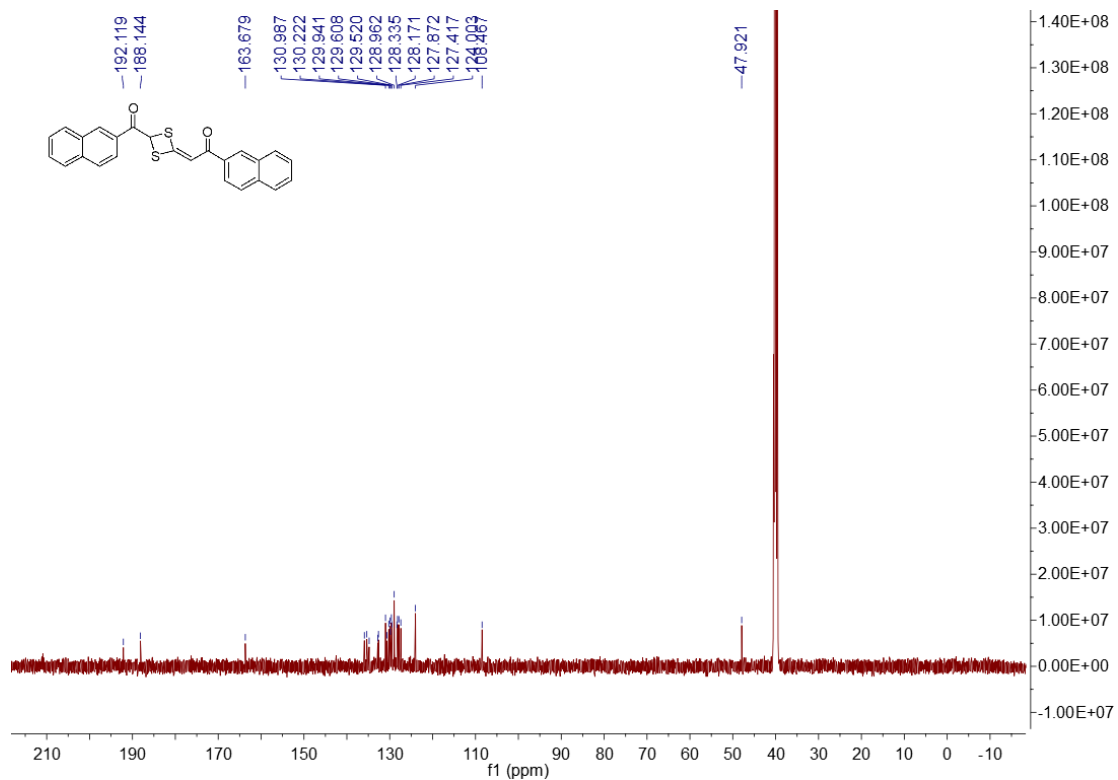

<sup>13</sup>C NMR Spectrum of 1e (DMSO-*d*<sub>6</sub>), 125 MHz

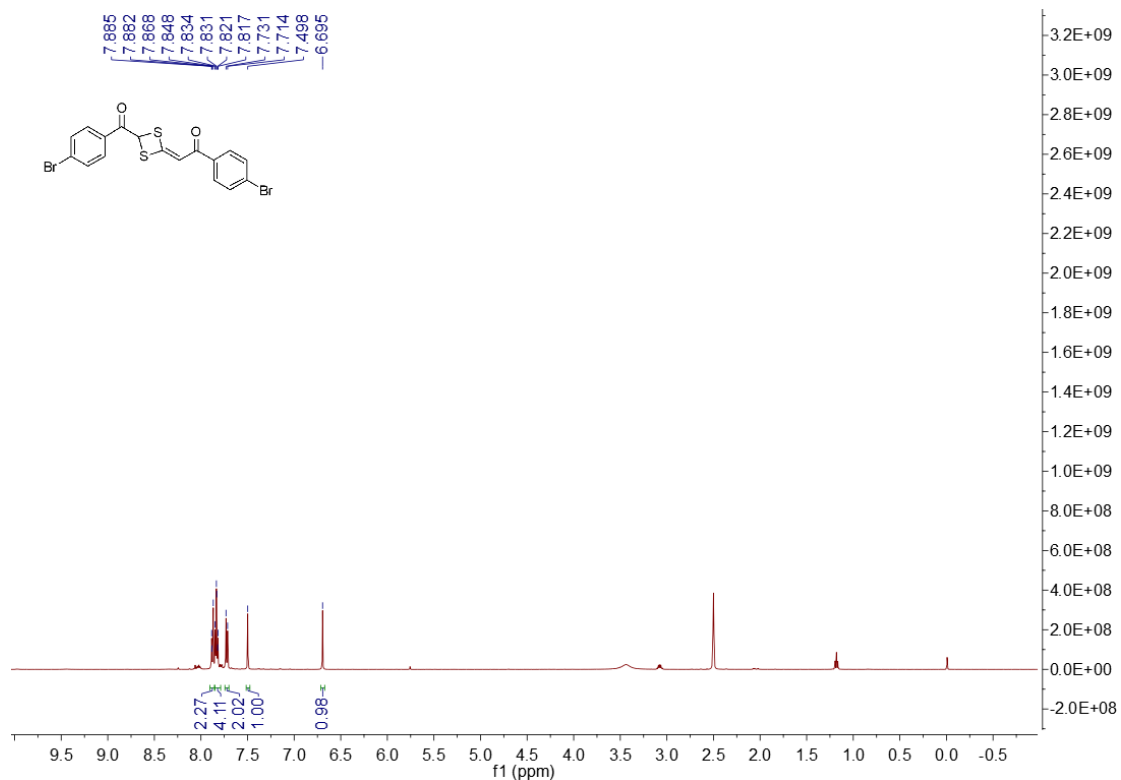

<sup>1</sup>H NMR Spectrum of 1f (DMSO-*d*<sub>6</sub>), 500 MHz)

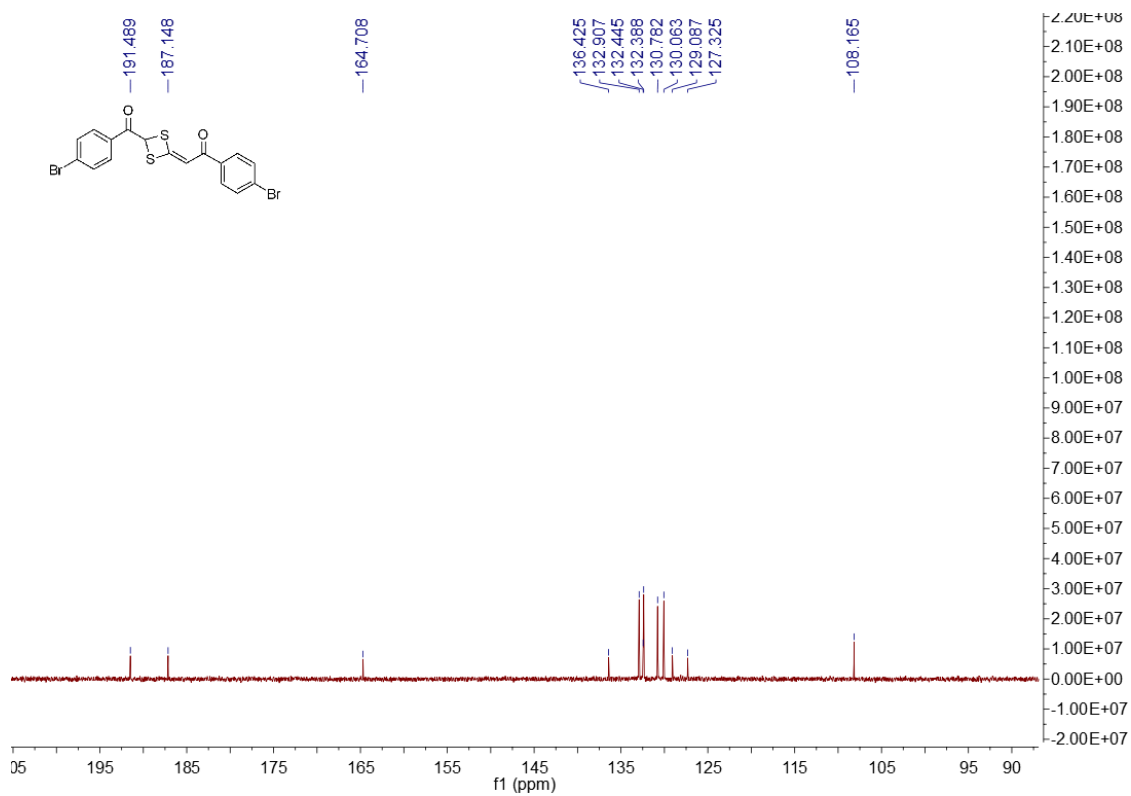

<sup>13</sup>C NMR Spectrum of 1f (DMSO-*d*<sub>6</sub>, 125 MHz)



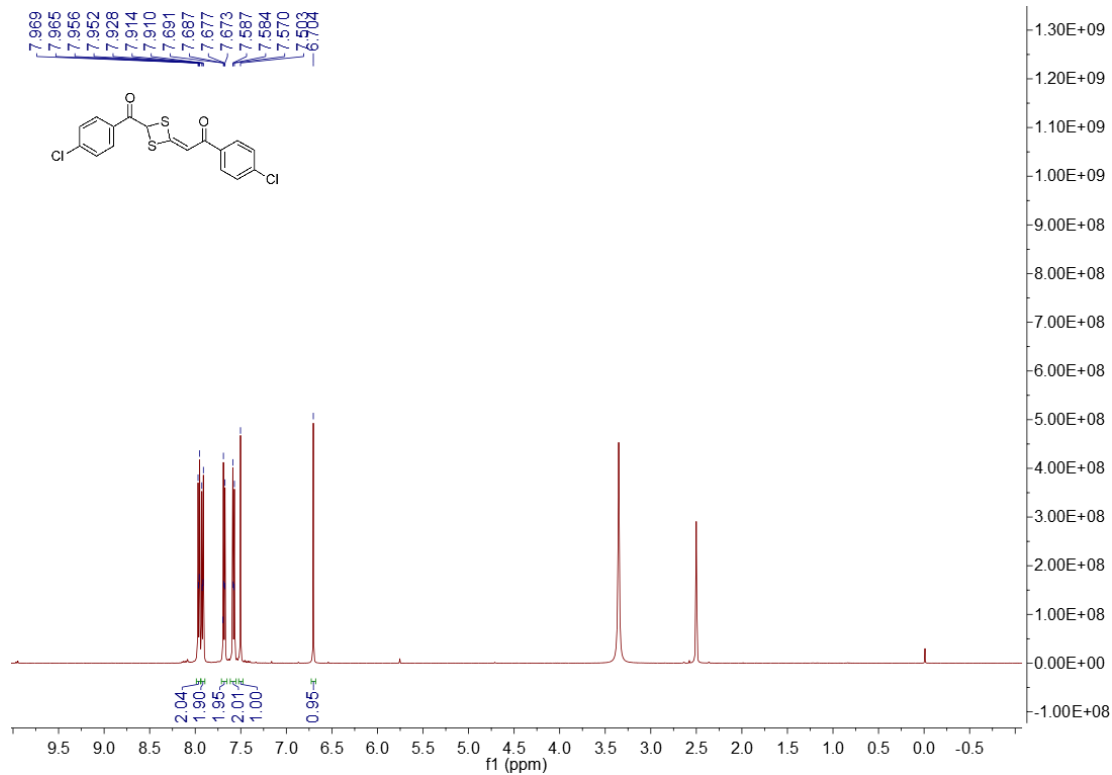

<sup>1</sup>H NMR Spectrum of 1g (DMSO-*d*<sub>6</sub>), 500 MHz

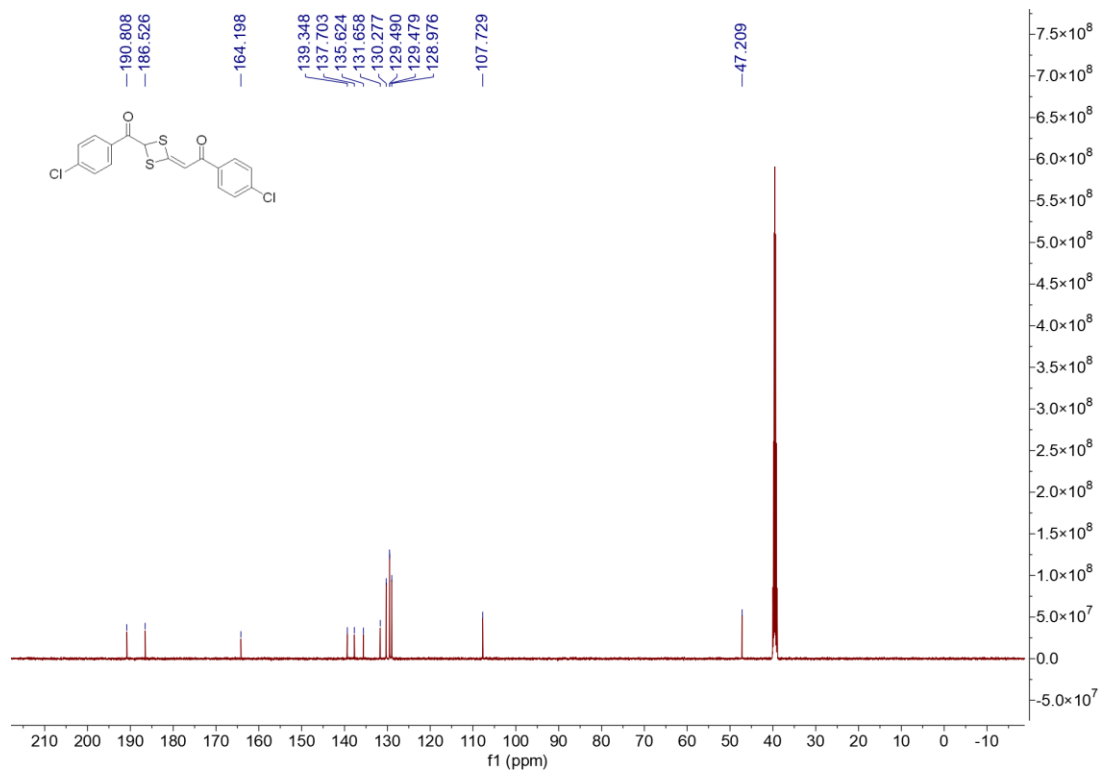

<sup>13</sup>C NMR Spectrum of 1g (DMSO-*d*<sub>6</sub>), 125 MHz

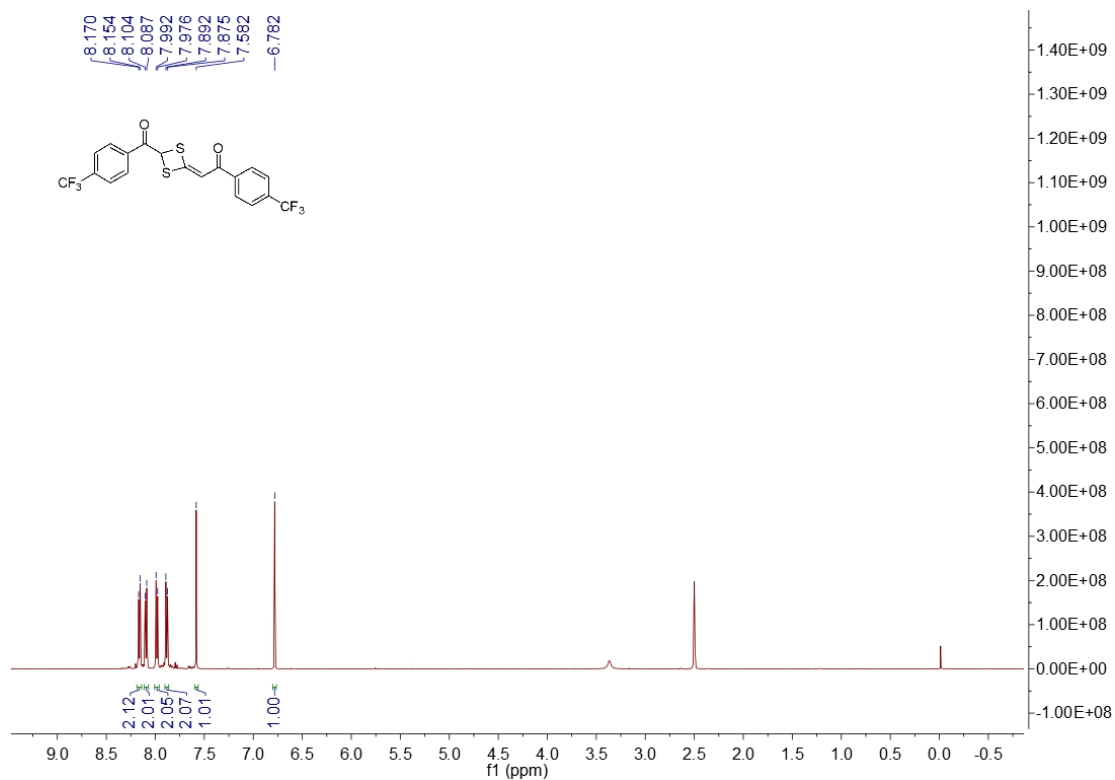

<sup>1</sup>H NMR Spectrum of 1h (DMSO-*d*<sub>6</sub>), 500 MHz

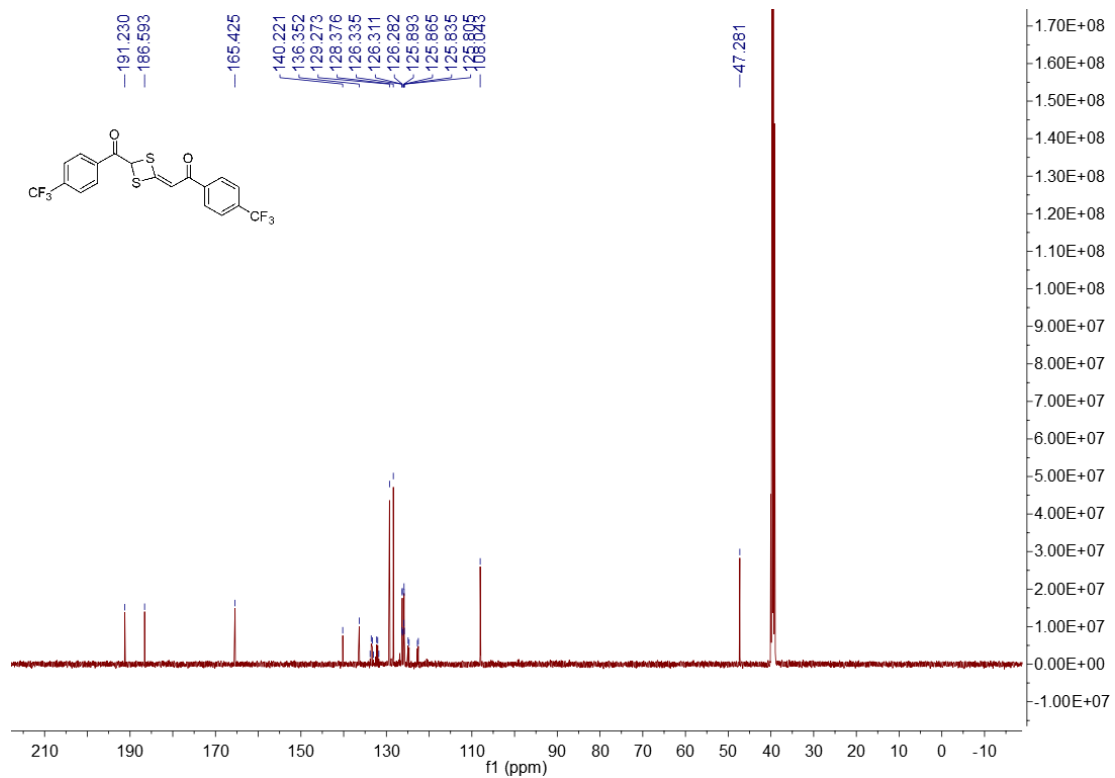

<sup>13</sup>C NMR Spectrum of 1h (DMSO-*d*<sub>6</sub>), 125 MHz

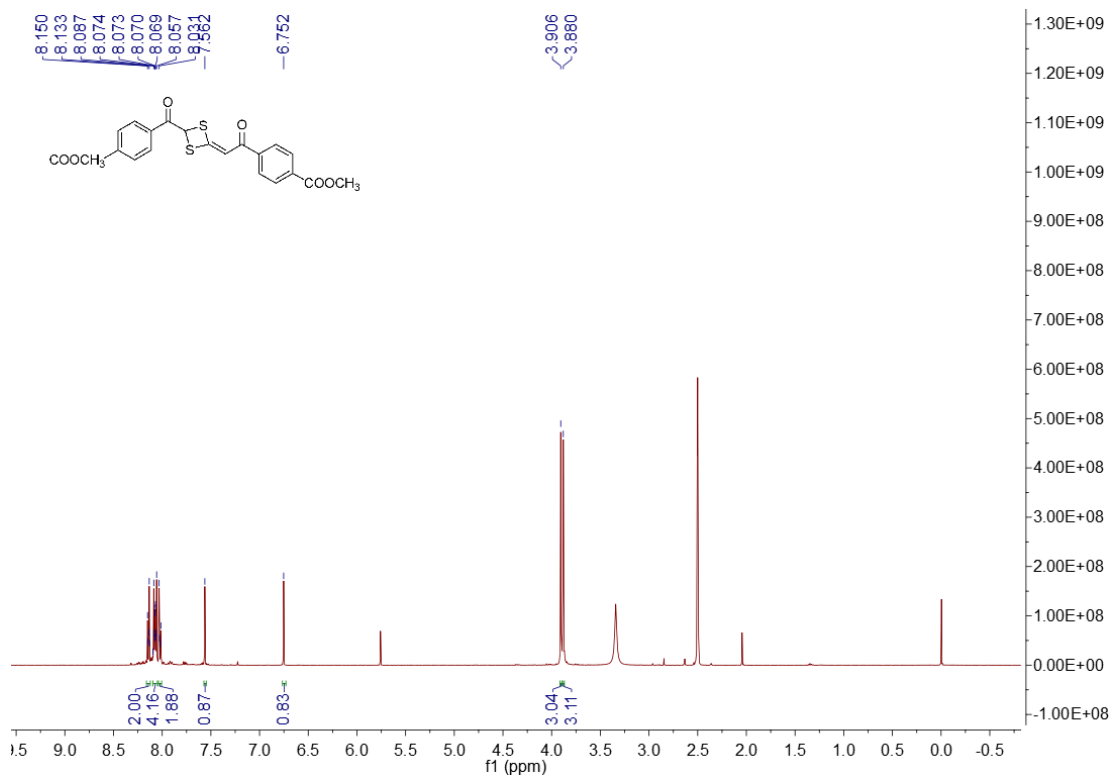

<sup>1</sup>H NMR Spectrum of 1i (DMSO-*d*<sub>6</sub>), 500 MHz

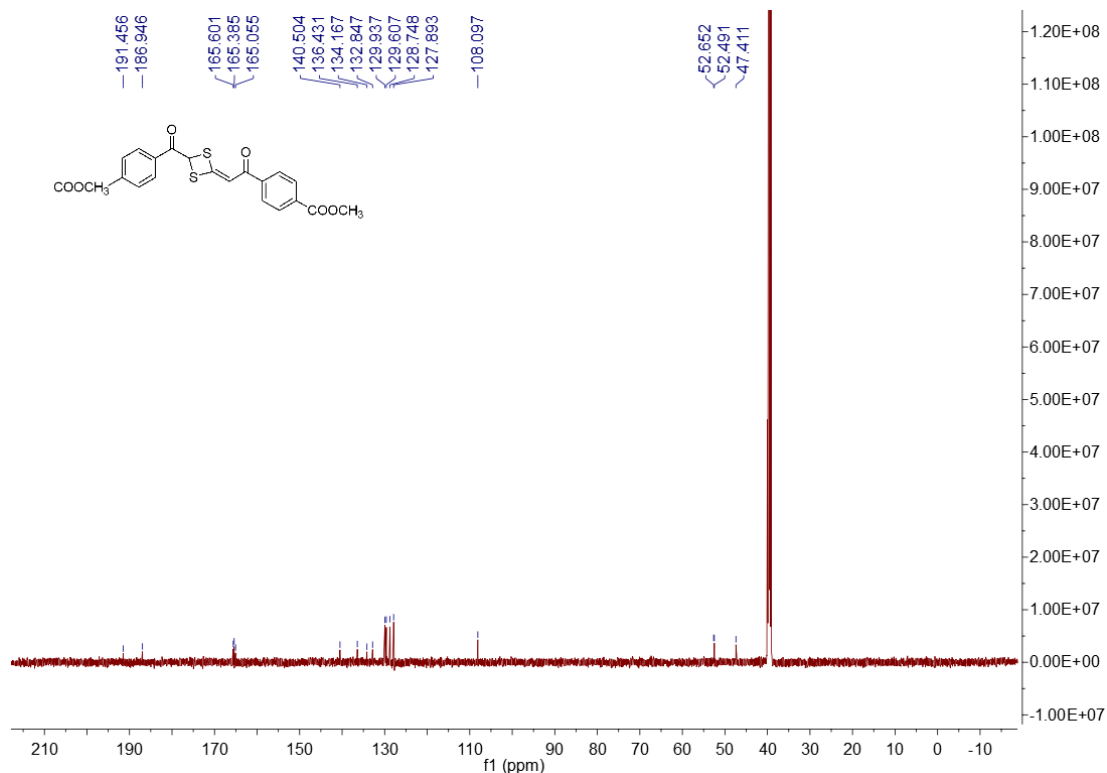

<sup>13</sup>C NMR Spectrum of 1i (DMSO-*d*<sub>6</sub>), 125 MHz

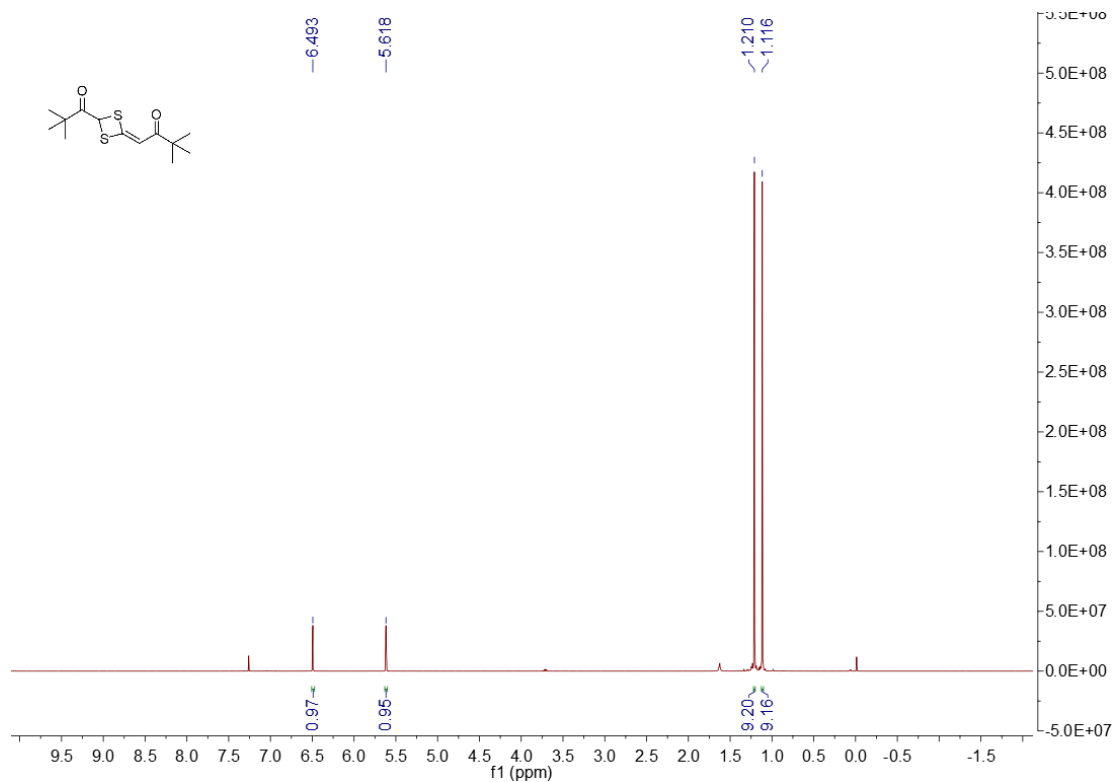

<sup>1</sup>H NMR Spectrum of 1j (CDCl<sub>3</sub>, 500 MHz)

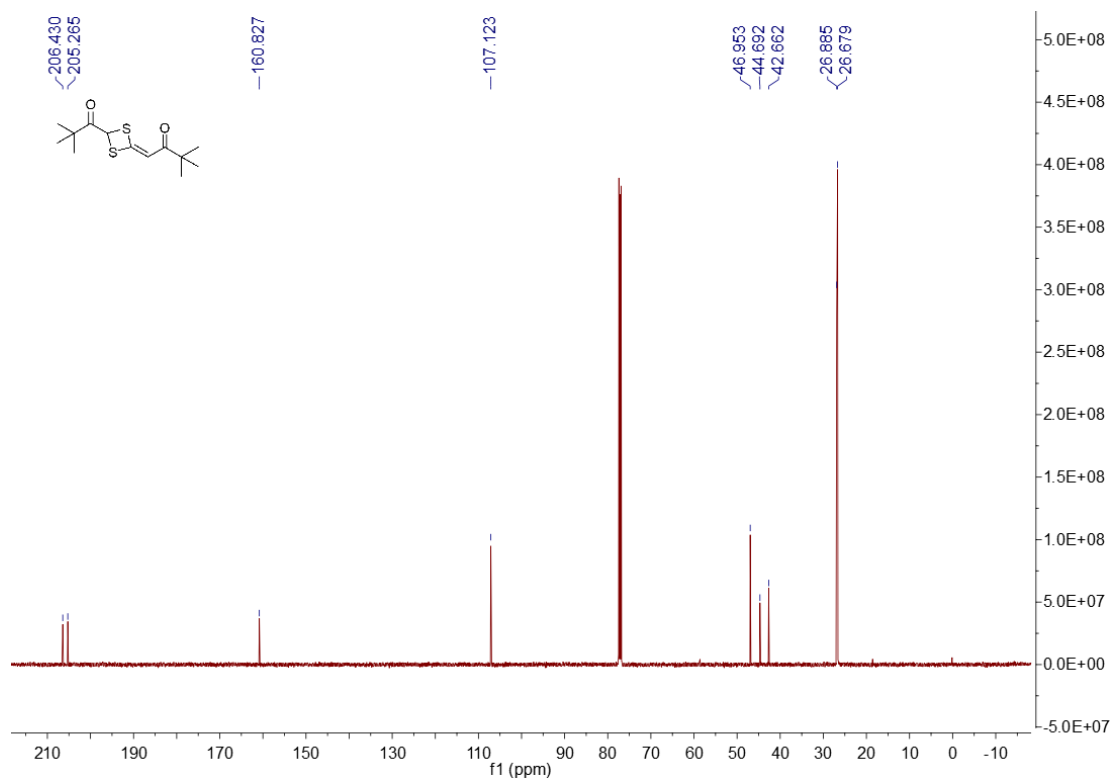

<sup>13</sup>C NMR Spectrum of 1j (CDCl<sub>3</sub>, 125 MHz)

## VII. <sup>1</sup>H NMR and <sup>13</sup>C NMR Spectra of Final Products 3 and 5

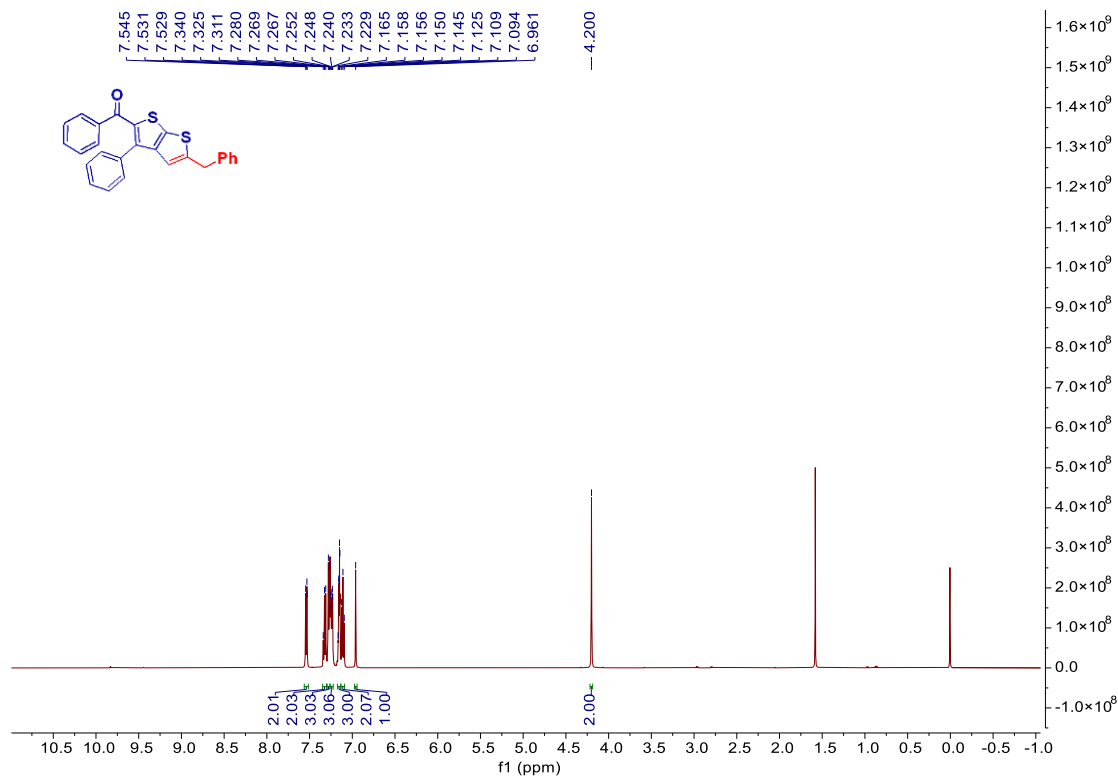

<sup>1</sup>H NMR Spectrum of 3a (CDCl<sub>3</sub>, 500 MHz)

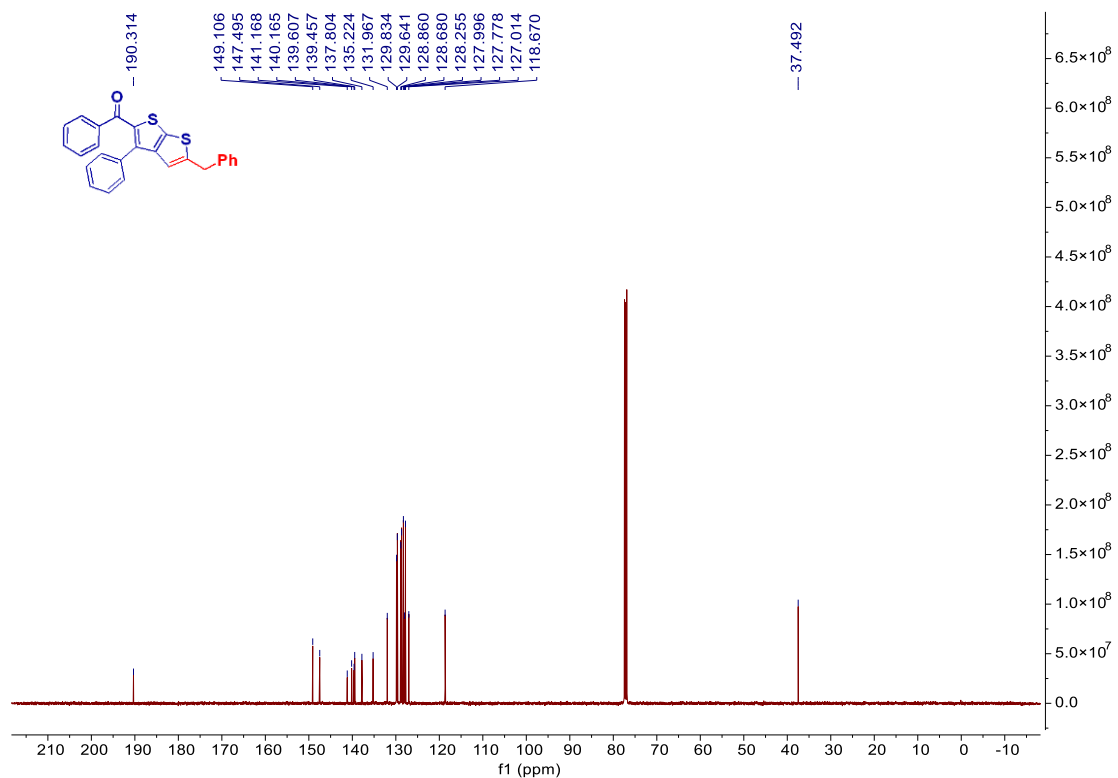

<sup>13</sup>C NMR Spectrum of 3a (CDCl<sub>3</sub>, 125 MHz)

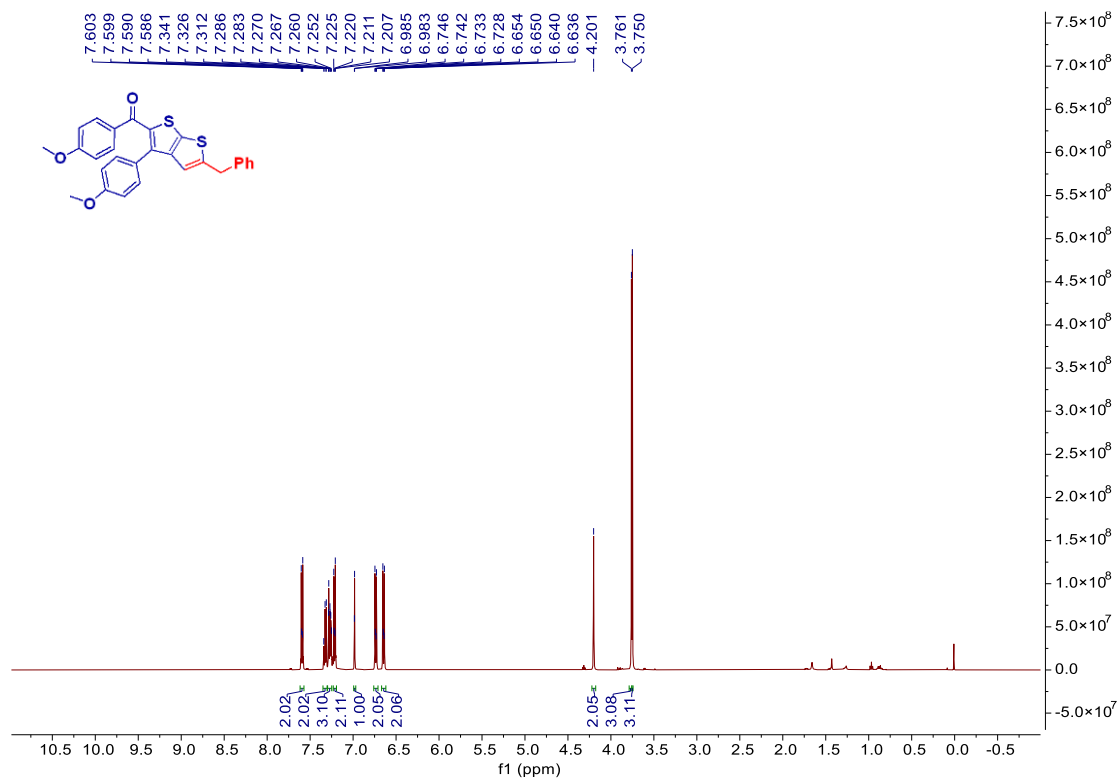

<sup>1</sup>H NMR Spectrum of 3b (CDCl<sub>3</sub>, 500 MHz)

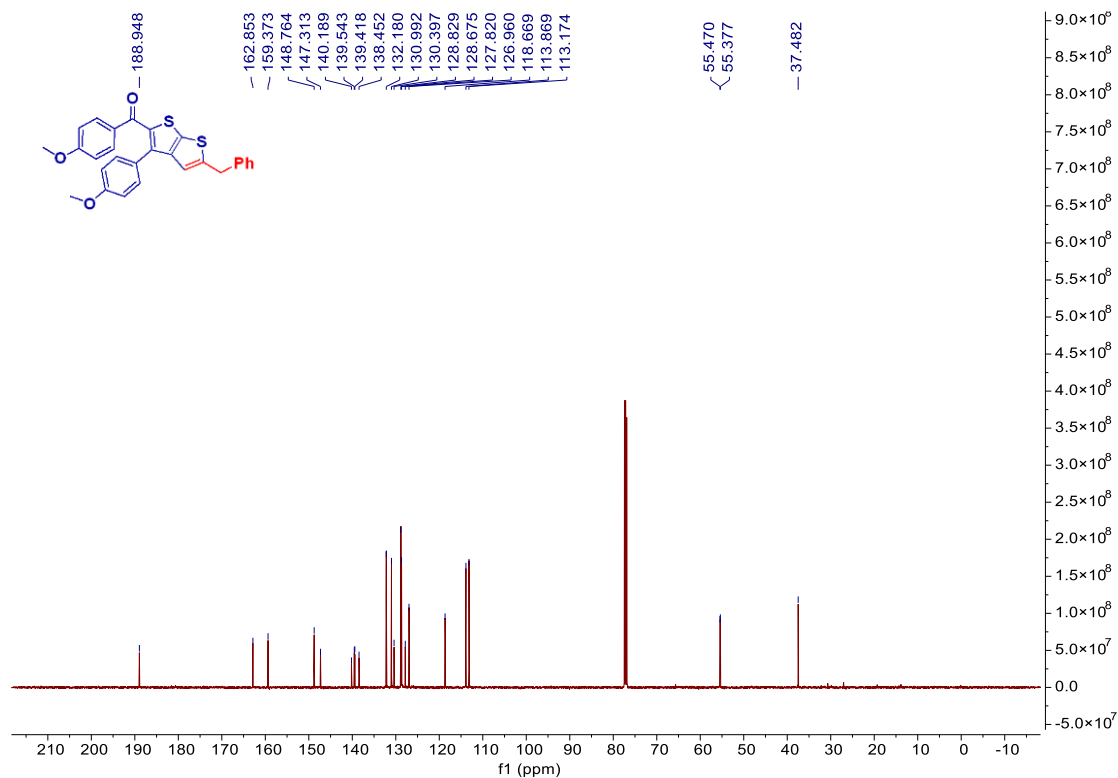

<sup>13</sup>C NMR Spectrum of 3b (CDCl<sub>3</sub>, 125 MHz)

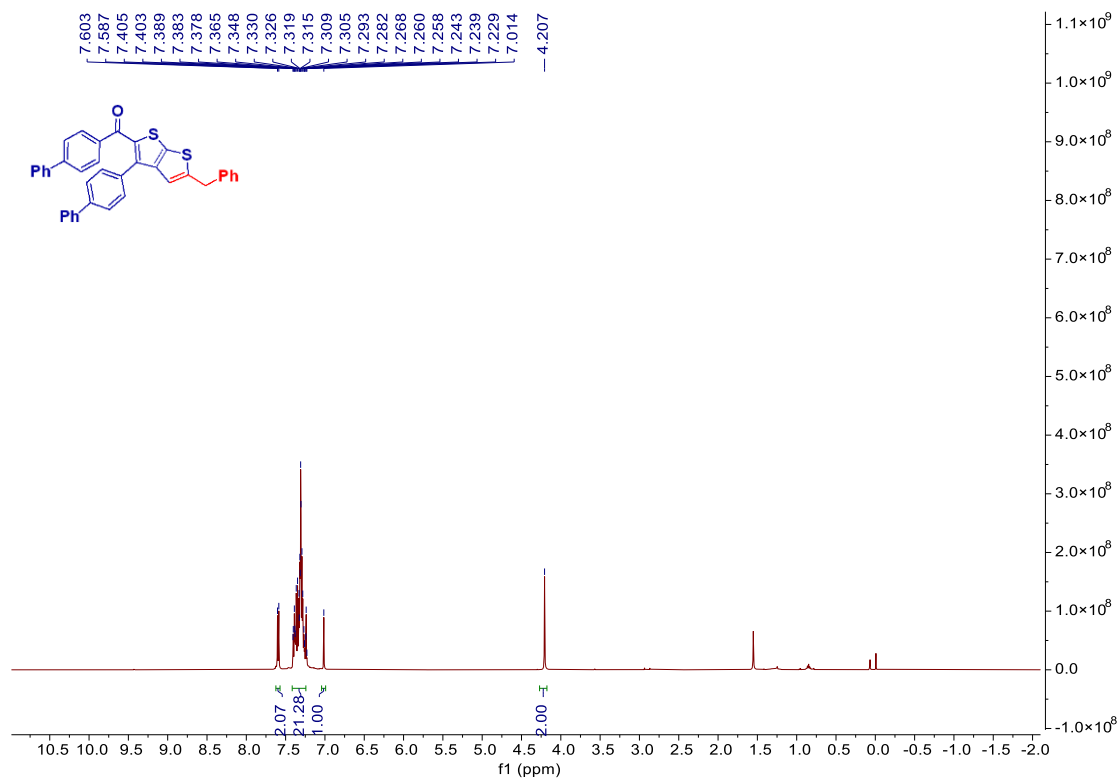

<sup>1</sup>H NMR Spectrum of 3c (CDCl<sub>3</sub>, 500 MHz)

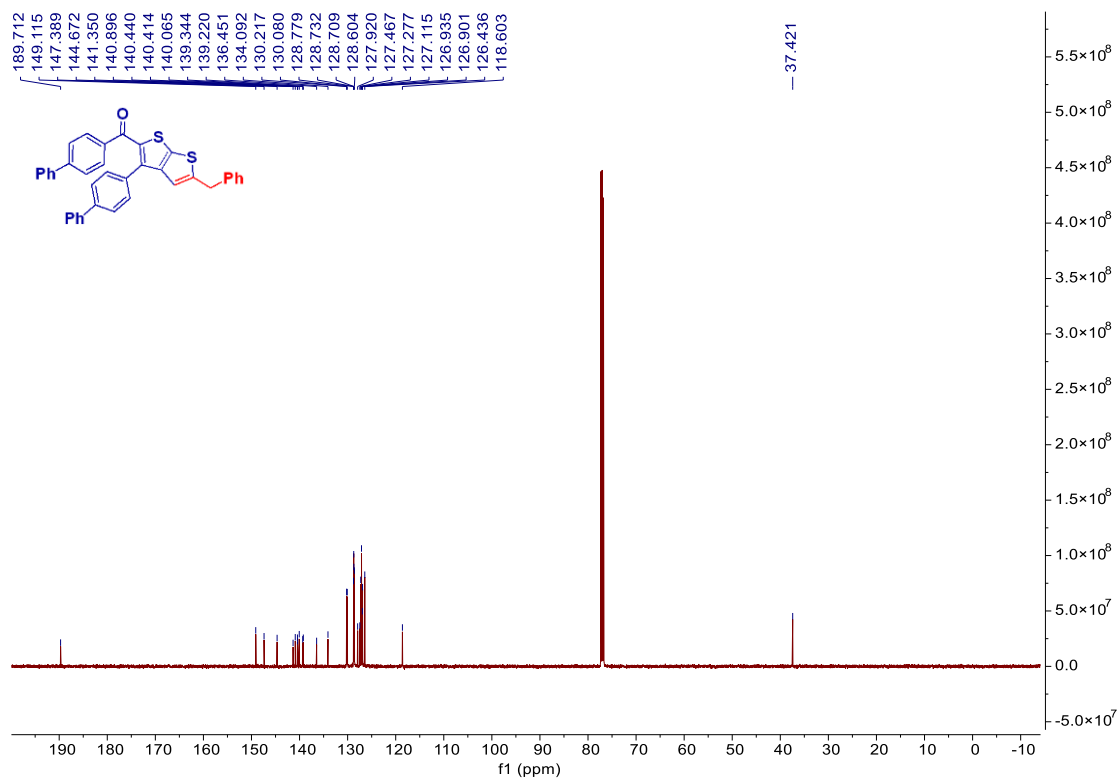

<sup>13</sup>C NMR Spectrum of 3c (CDCl<sub>3</sub>, 125 MHz)

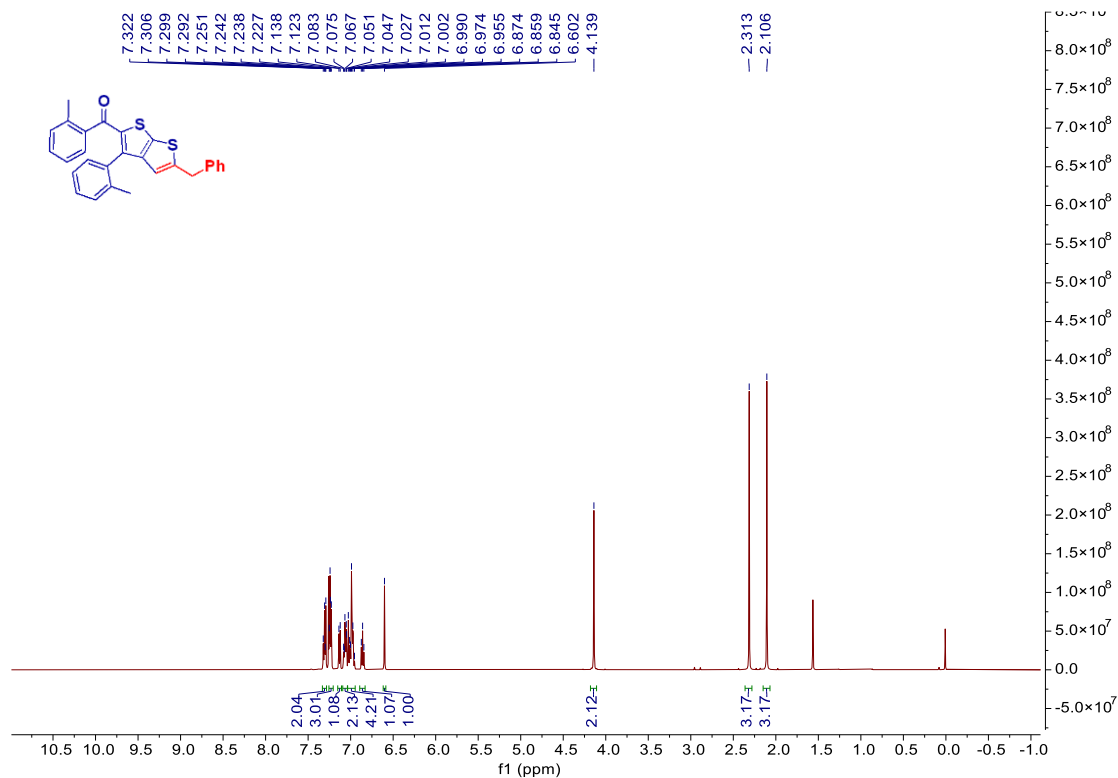

<sup>1</sup>H NMR Spectrum of 3d (CDCl<sub>3</sub>, 500 MHz)

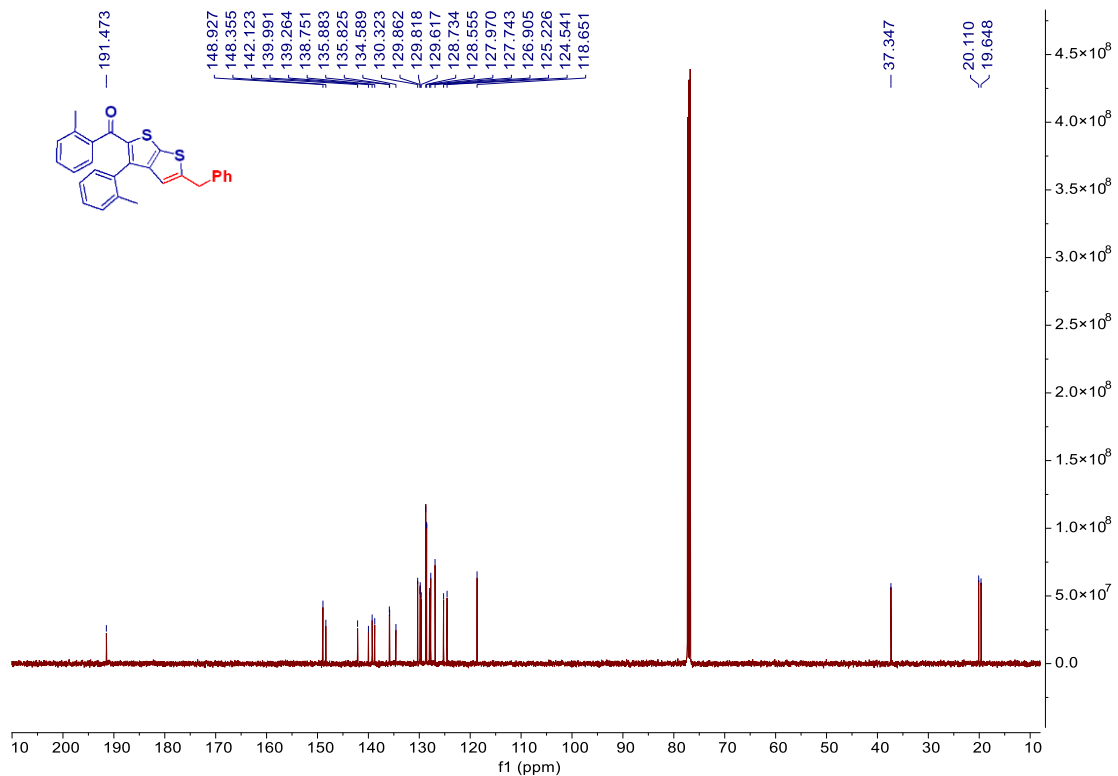

<sup>13</sup>C NMR Spectrum of 3d (CDCl<sub>3</sub>, 125 MHz)





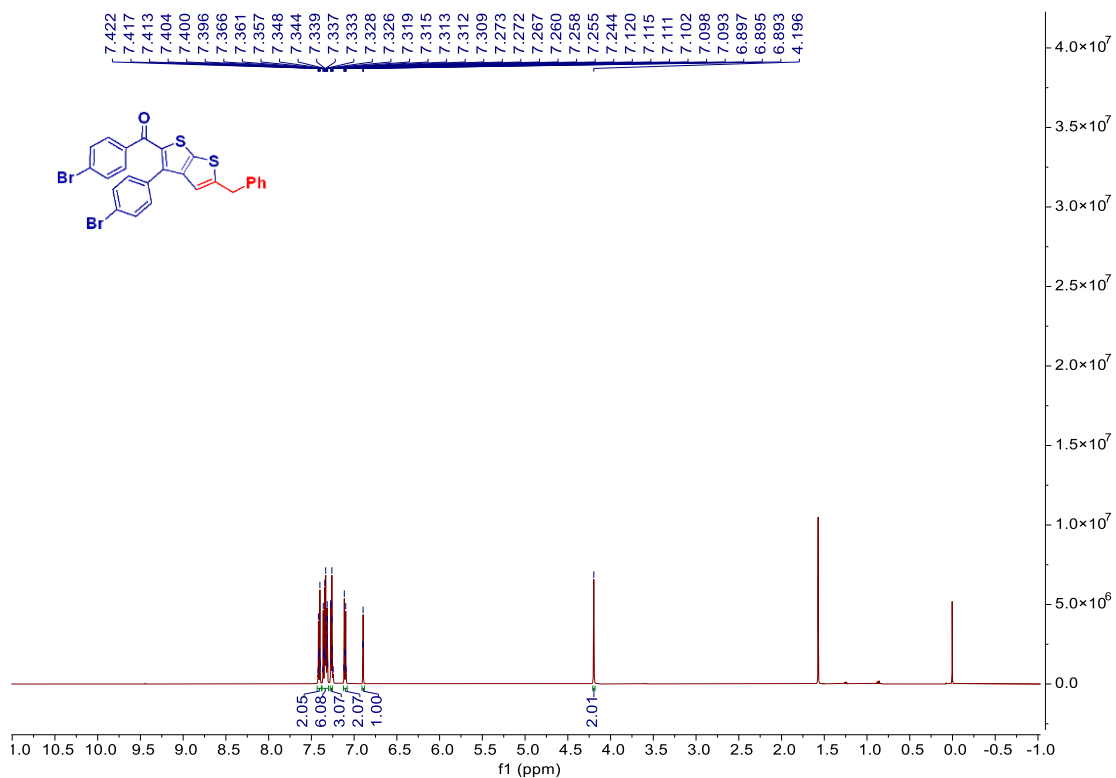

<sup>1</sup>H NMR Spectrum of 3f (CDCl<sub>3</sub>, 500 MHz)

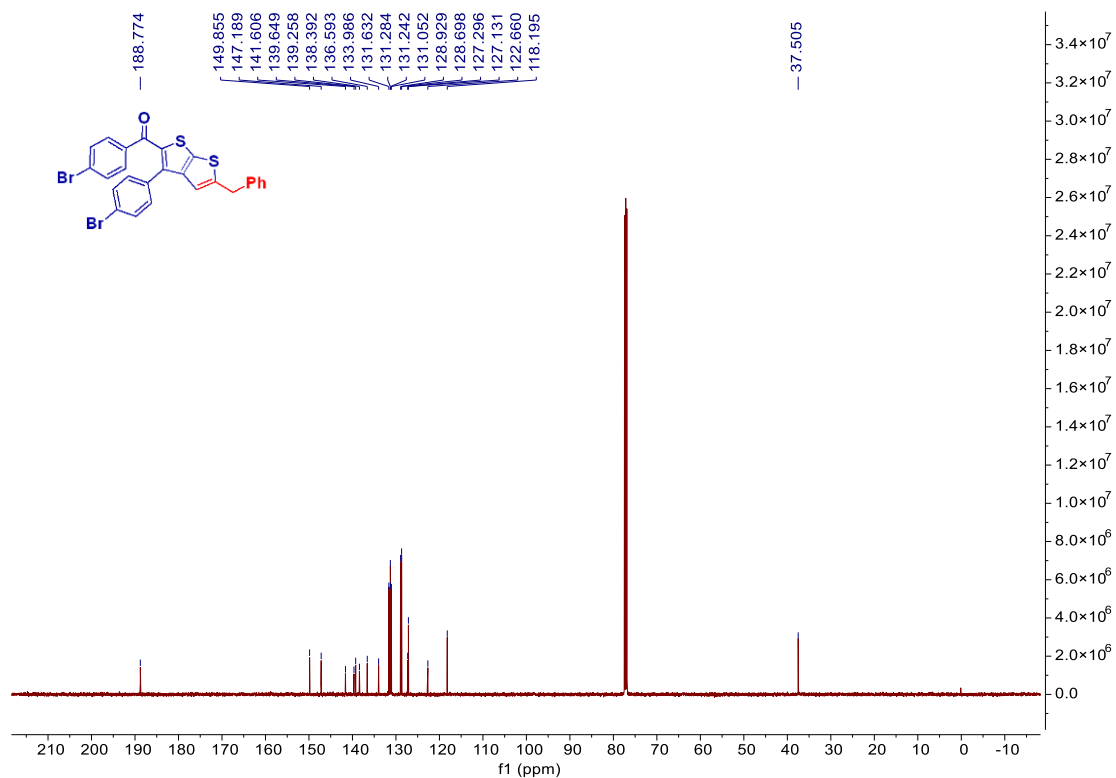

<sup>13</sup>C NMR Spectrum of 3f (CDCl<sub>3</sub>, 125 MHz)

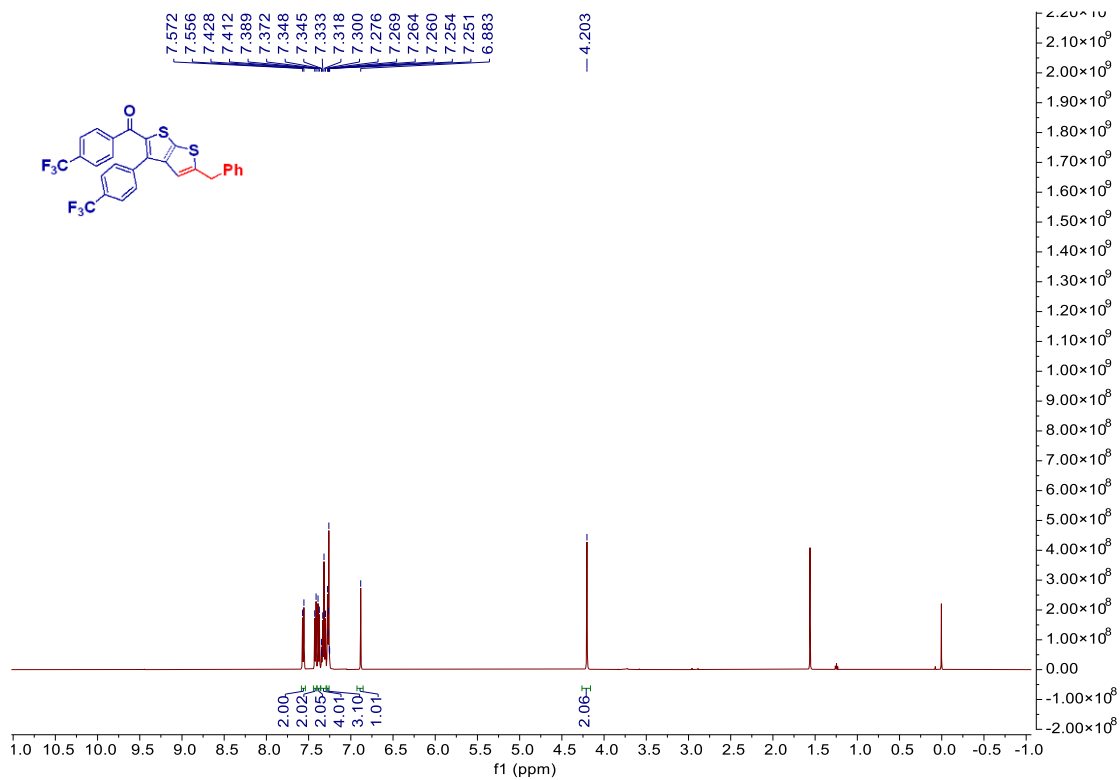

<sup>1</sup>H NMR Spectrum of 3g (CDCl<sub>3</sub>, 500 MHz)

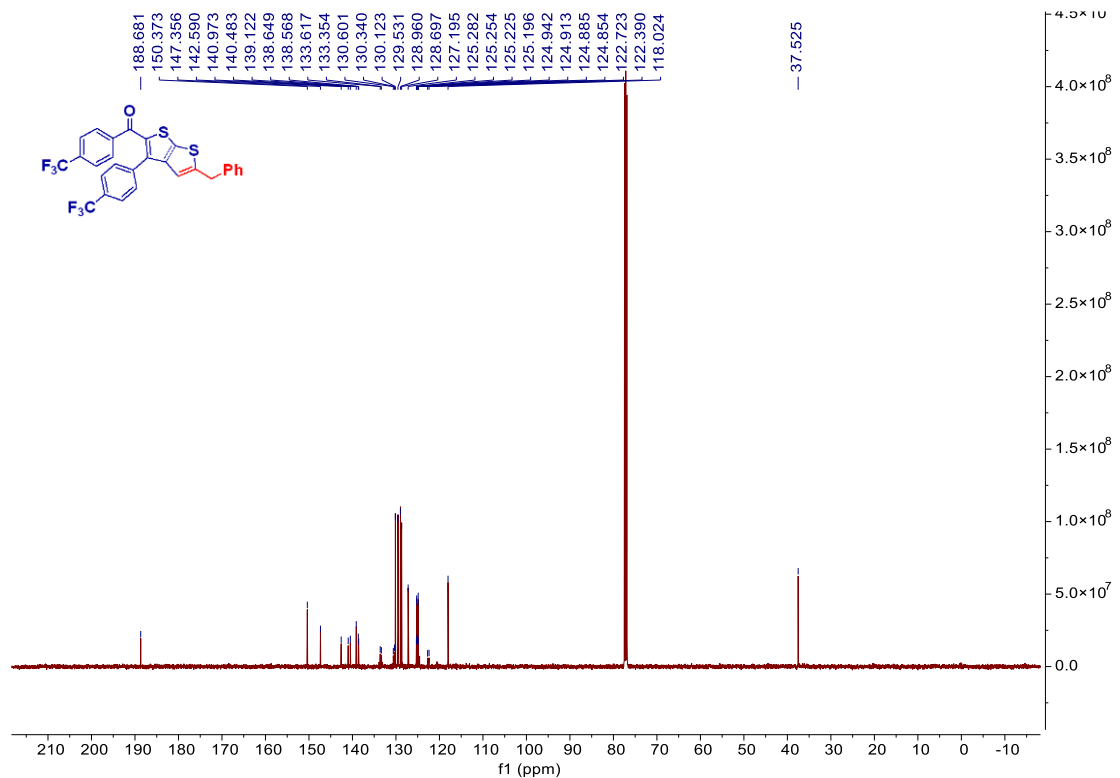

<sup>13</sup>C NMR Spectrum of 3g (CDCl<sub>3</sub>, 125 MHz)

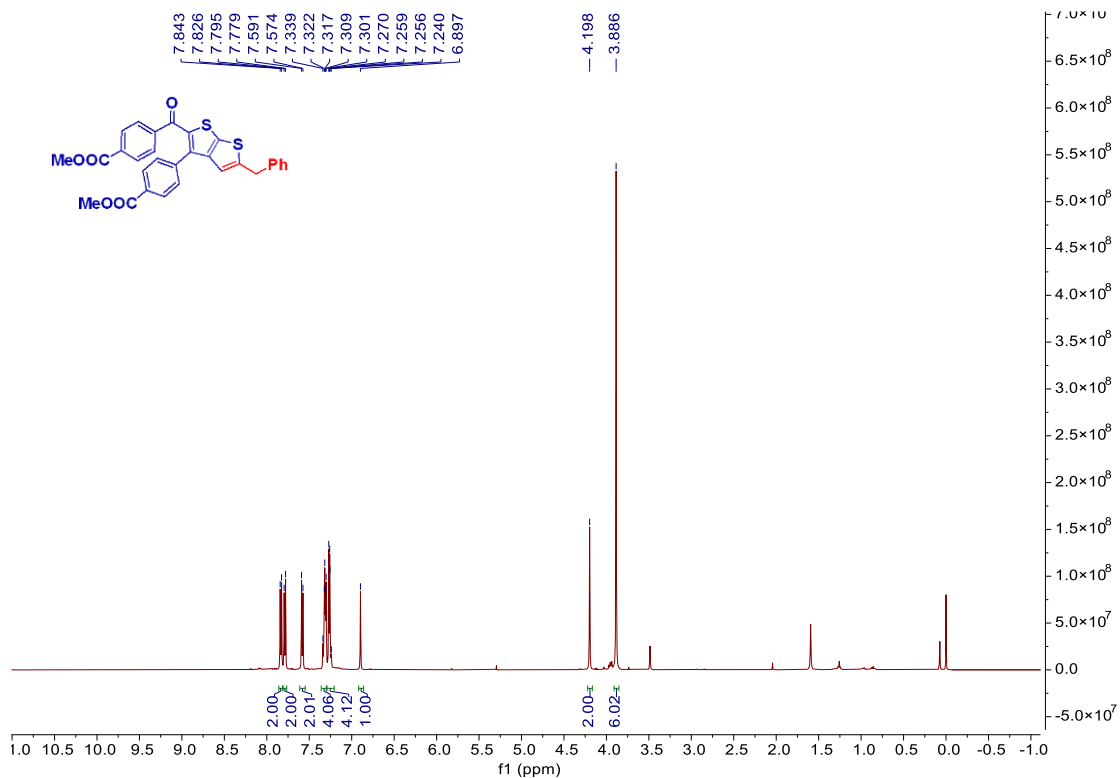

<sup>1</sup>H NMR Spectrum of 3h (CDCl<sub>3</sub>, 500 MHz)

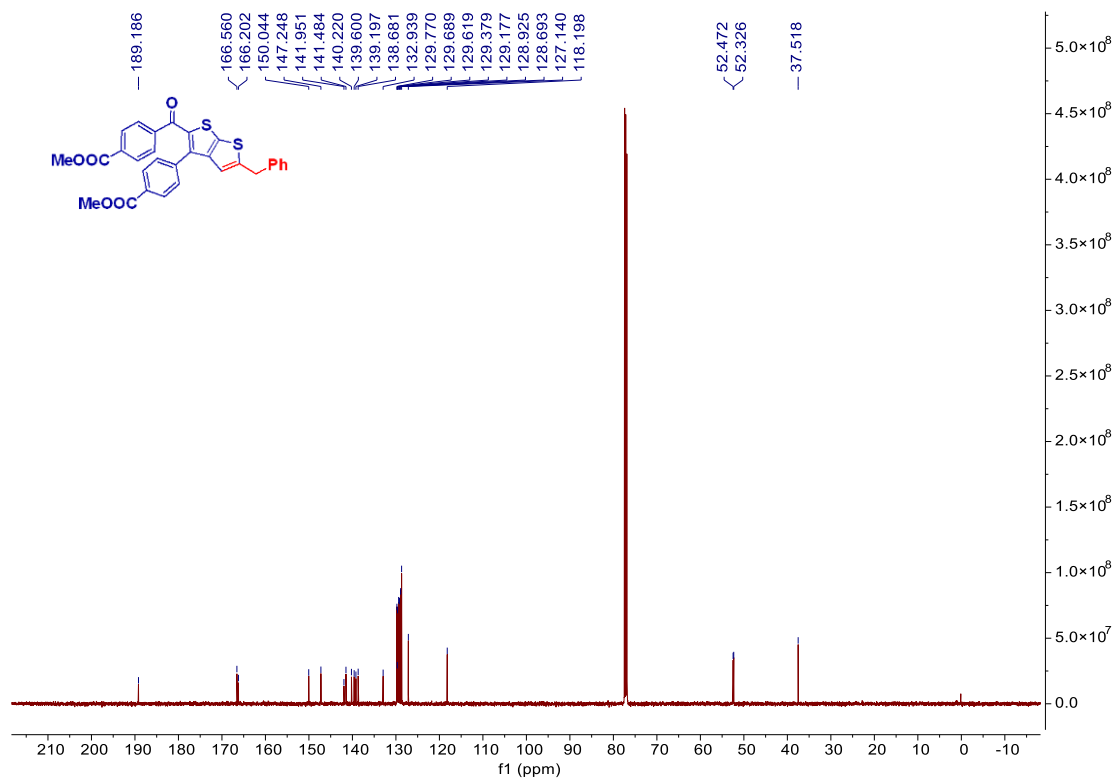

<sup>13</sup>C NMR Spectrum of 3h (CDCl<sub>3</sub>, 125 MHz)

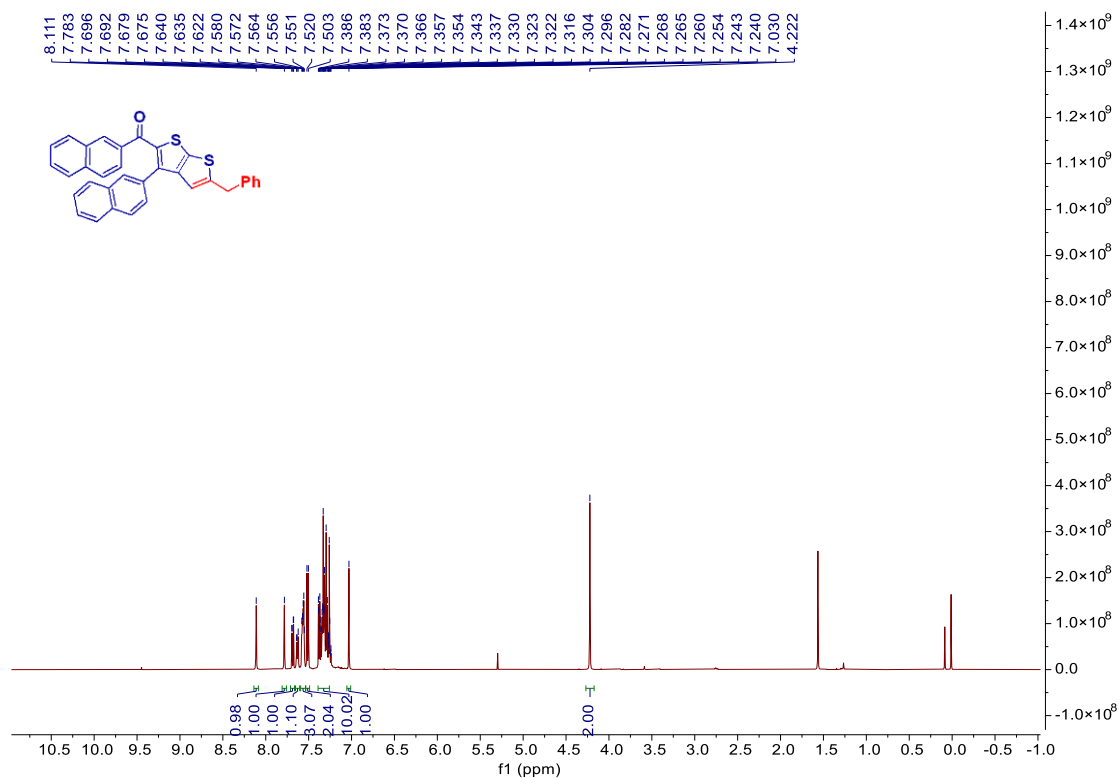

**<sup>1</sup>H NMR Spectrum of 3i (CDCl<sub>3</sub>, 500 MHz)**

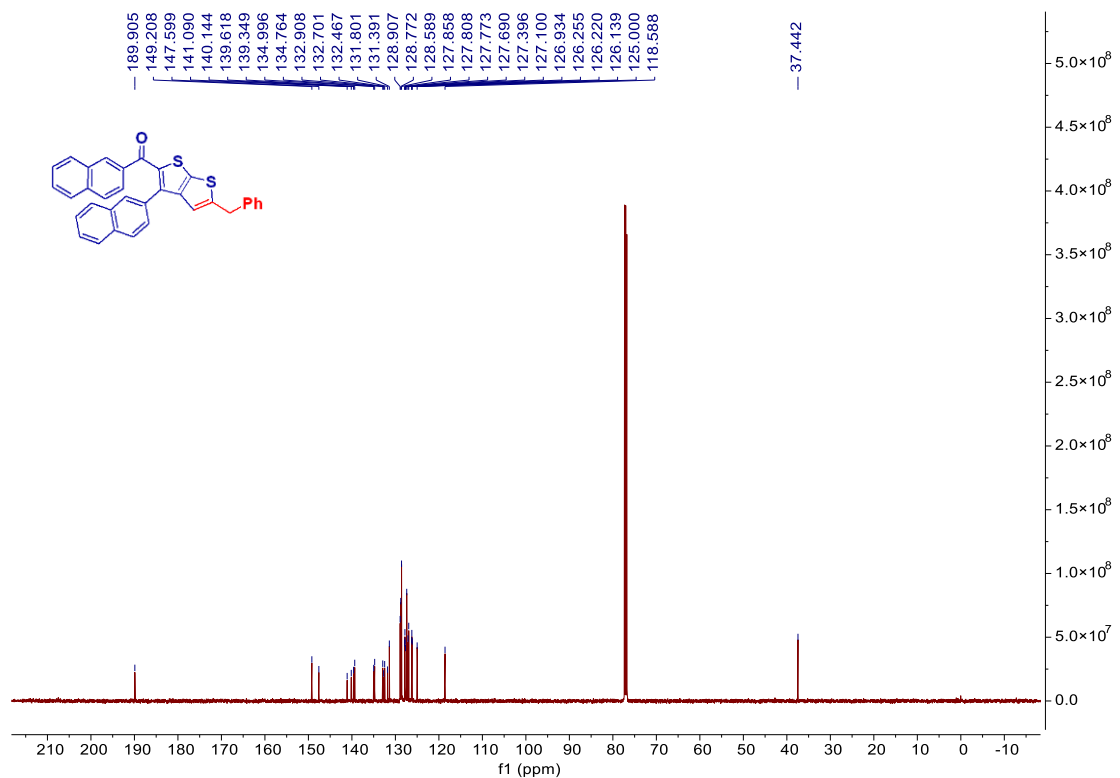

**<sup>13</sup>C NMR Spectrum of 3i (CDCl<sub>3</sub>, 125 MHz)**

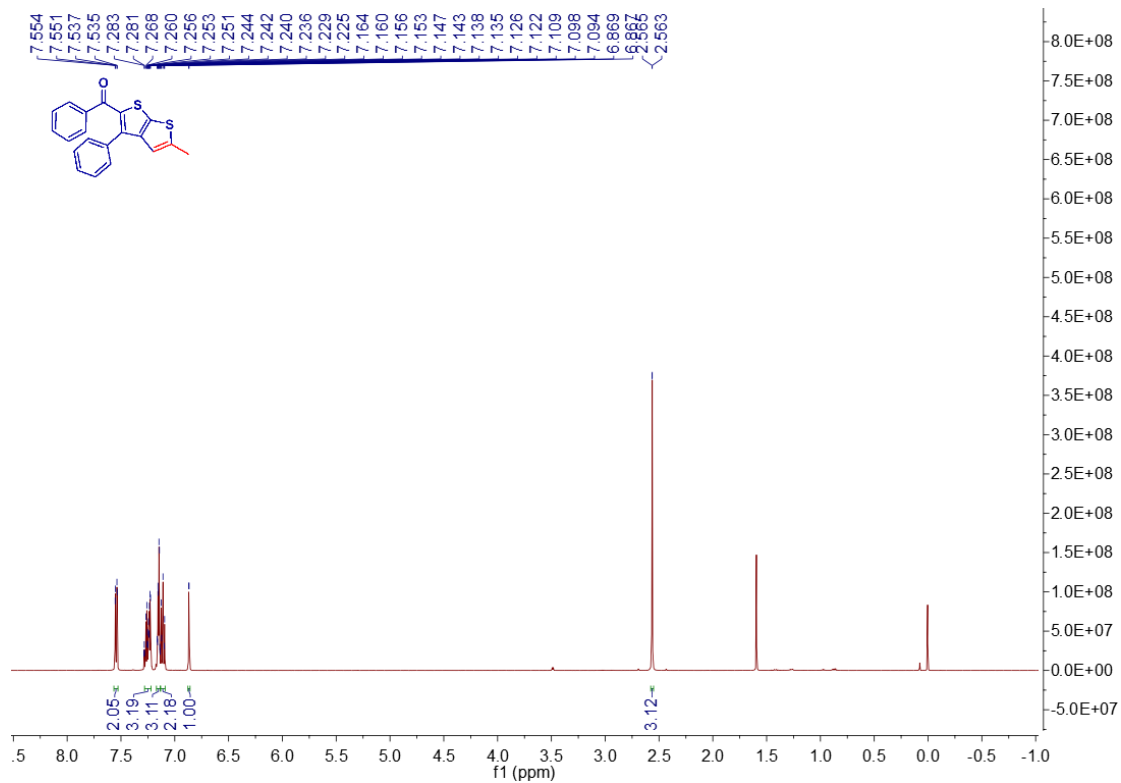

<sup>1</sup>H NMR Spectrum of 3k (CDCl<sub>3</sub>, 500 MHz)

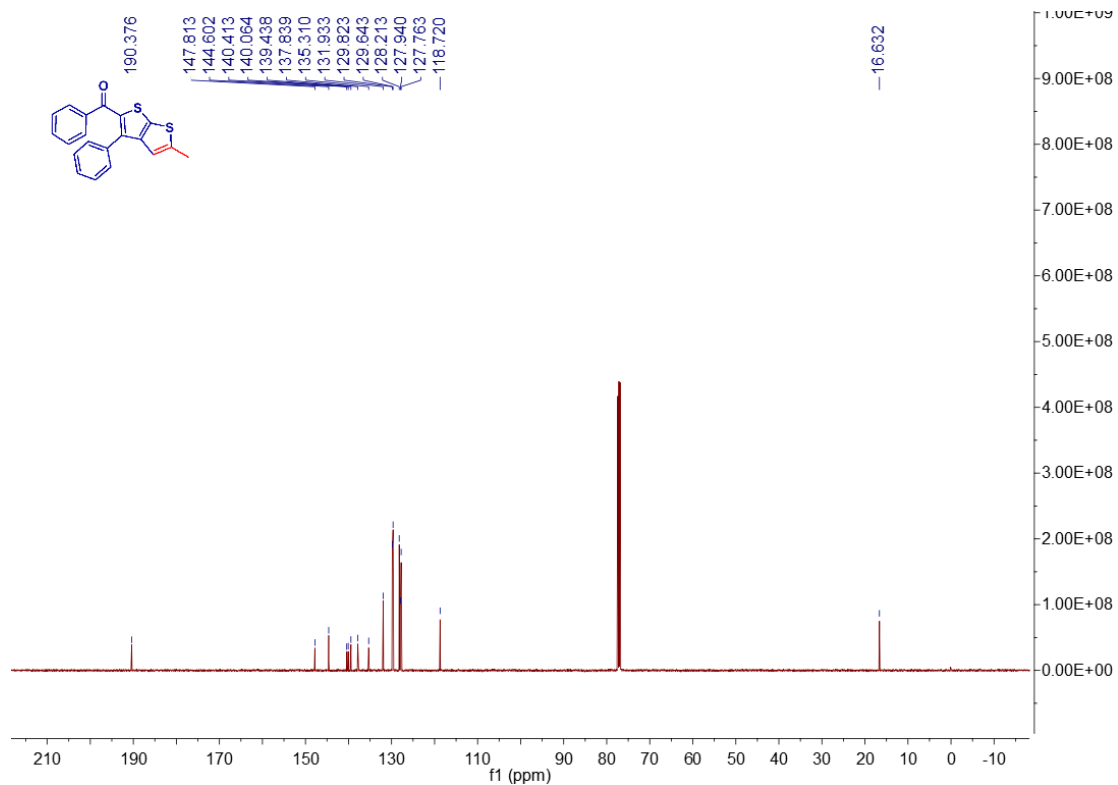

<sup>13</sup>C NMR Spectrum of 3k (CDCl<sub>3</sub>, 125 MHz)

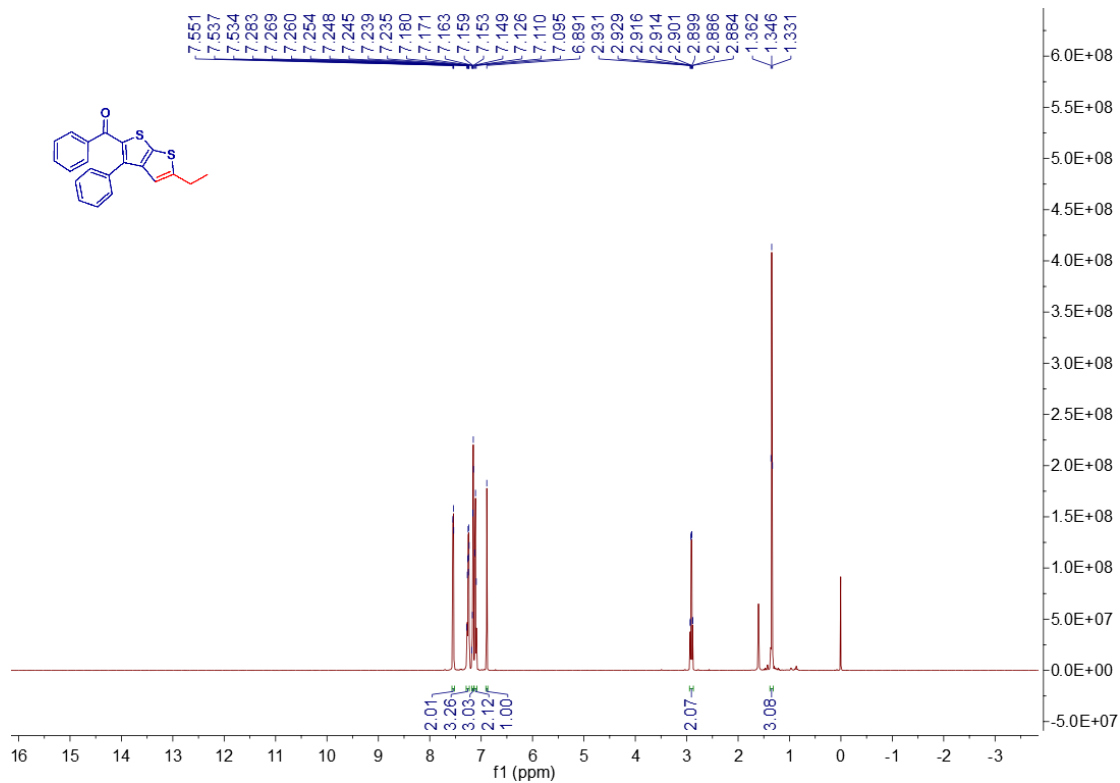

<sup>1</sup>H NMR Spectrum of 3l (CDCl<sub>3</sub>, 500 MHz)

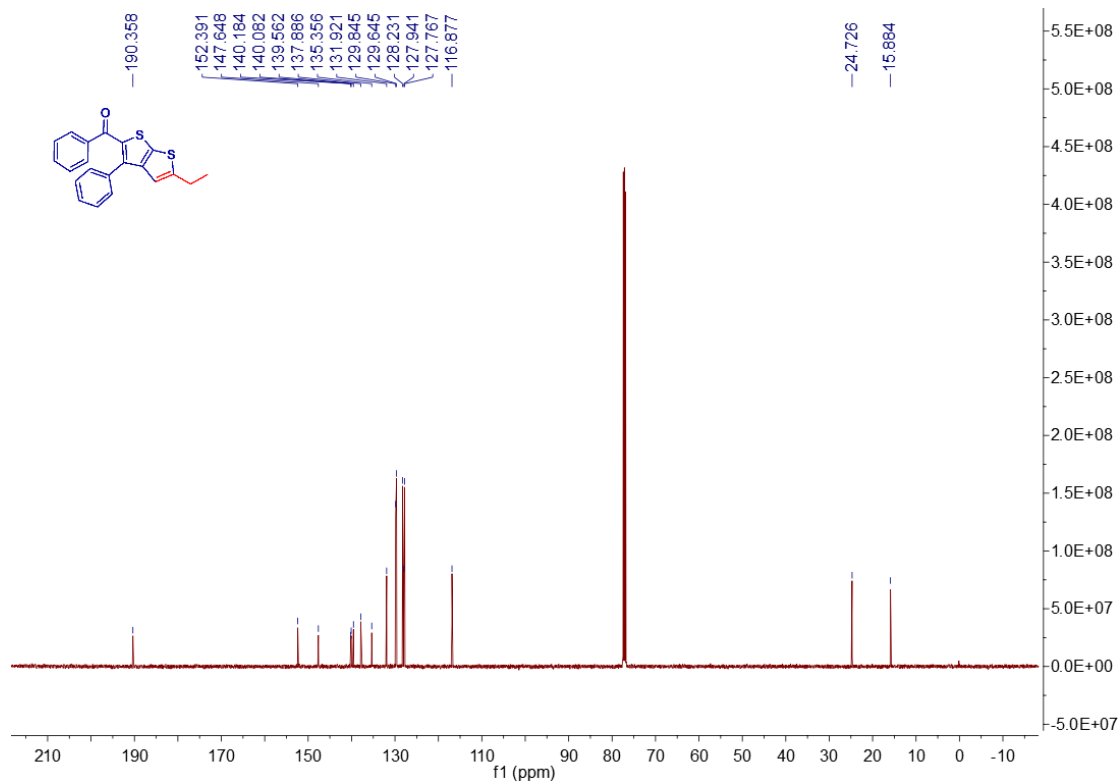

<sup>13</sup>C NMR Spectrum of 3l (CDCl<sub>3</sub>, 125 MHz)

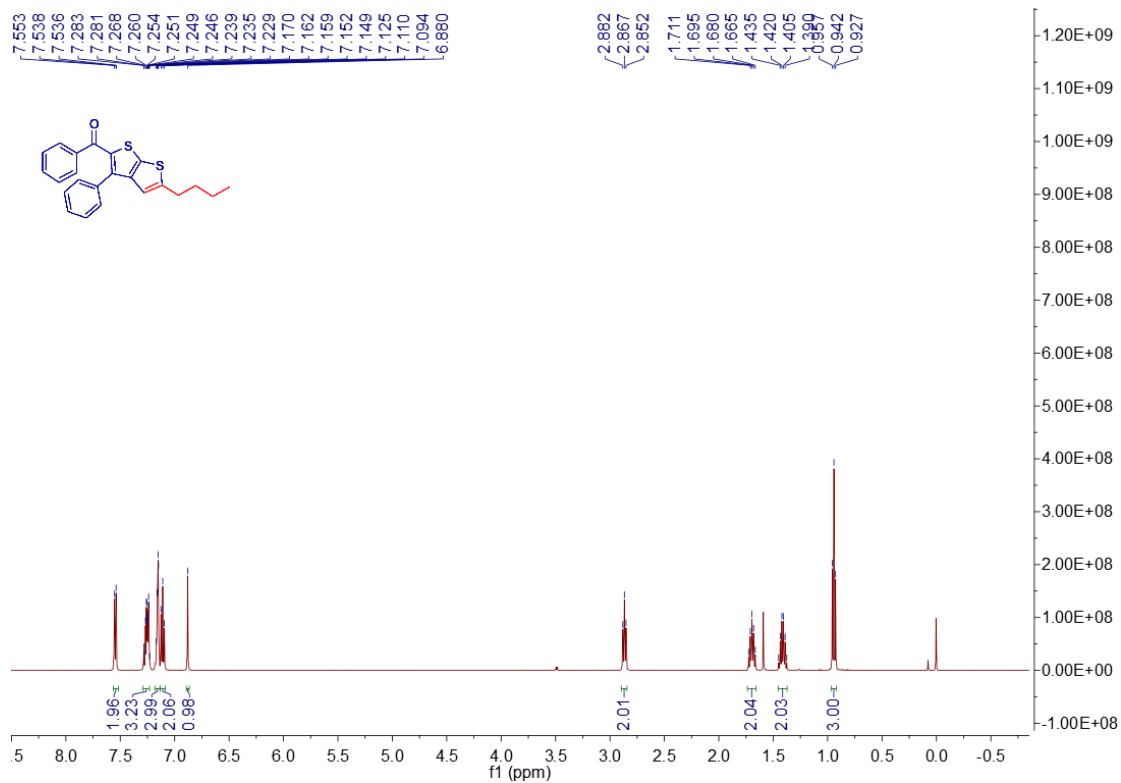

<sup>1</sup>H NMR Spectrum of 3m (CDCl<sub>3</sub>, 500 MHz)

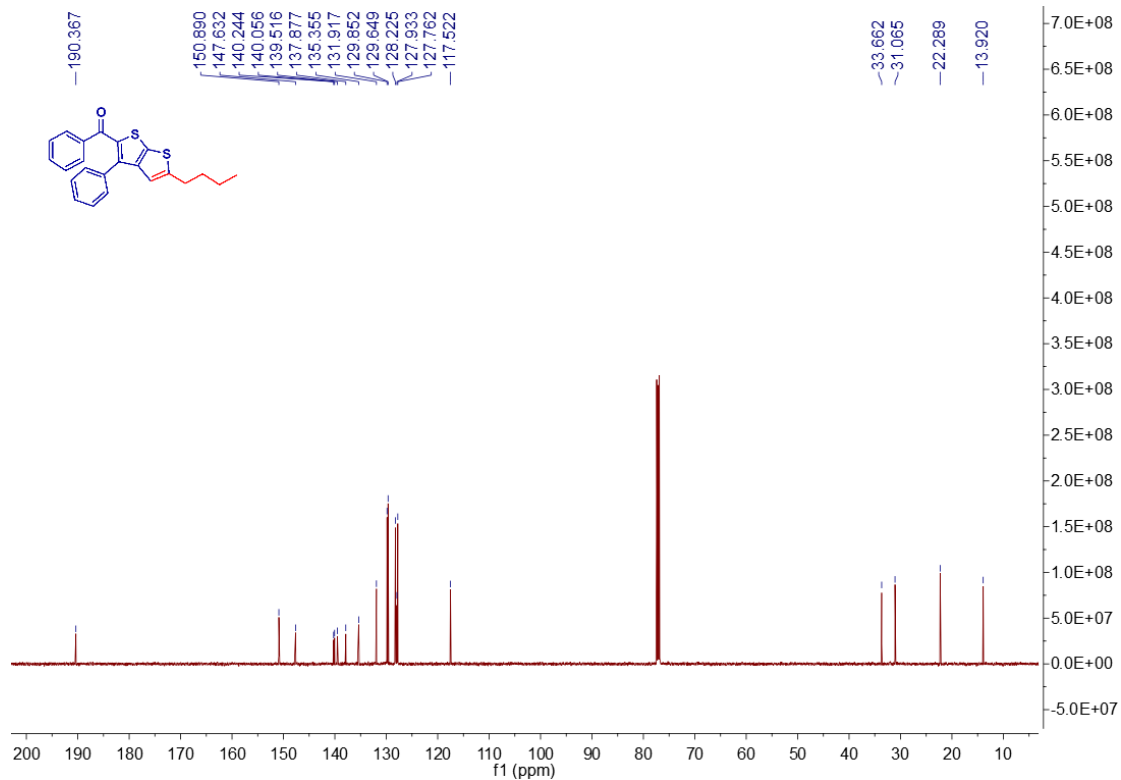

<sup>13</sup>C NMR Spectrum of 3m (CDCl<sub>3</sub>, 125 MHz)



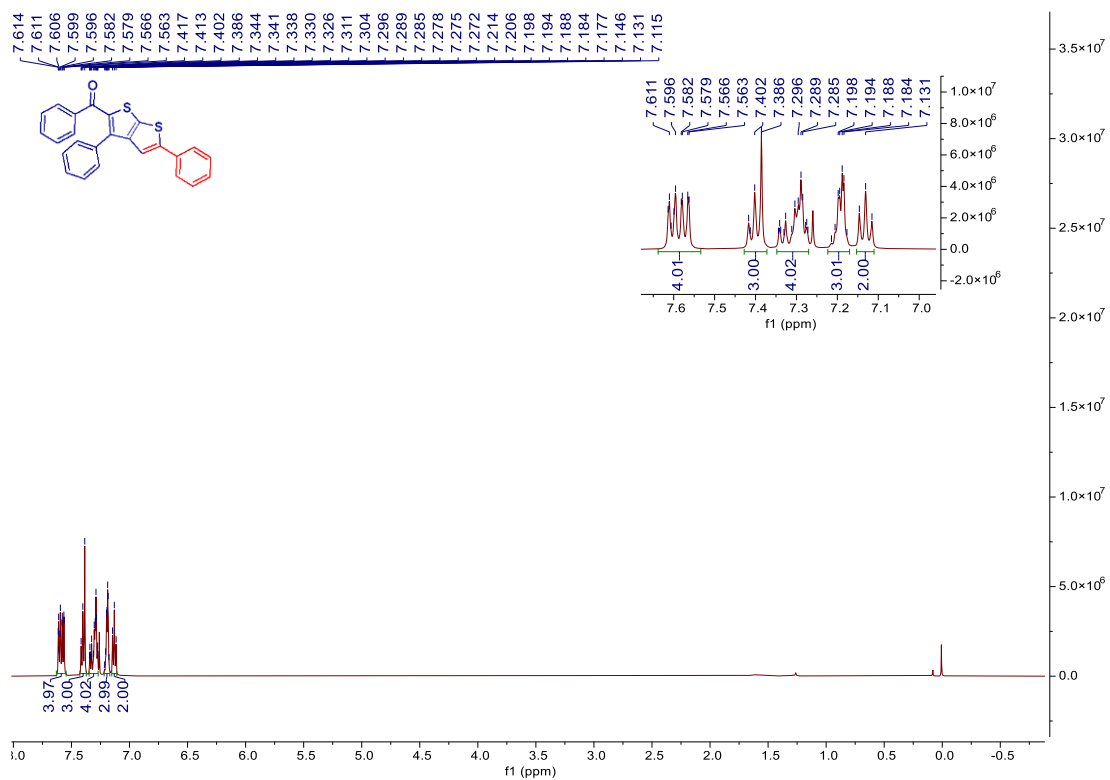

**<sup>1</sup>H NMR Spectrum of 3n (CDCl<sub>3</sub>, 500 MHz)**

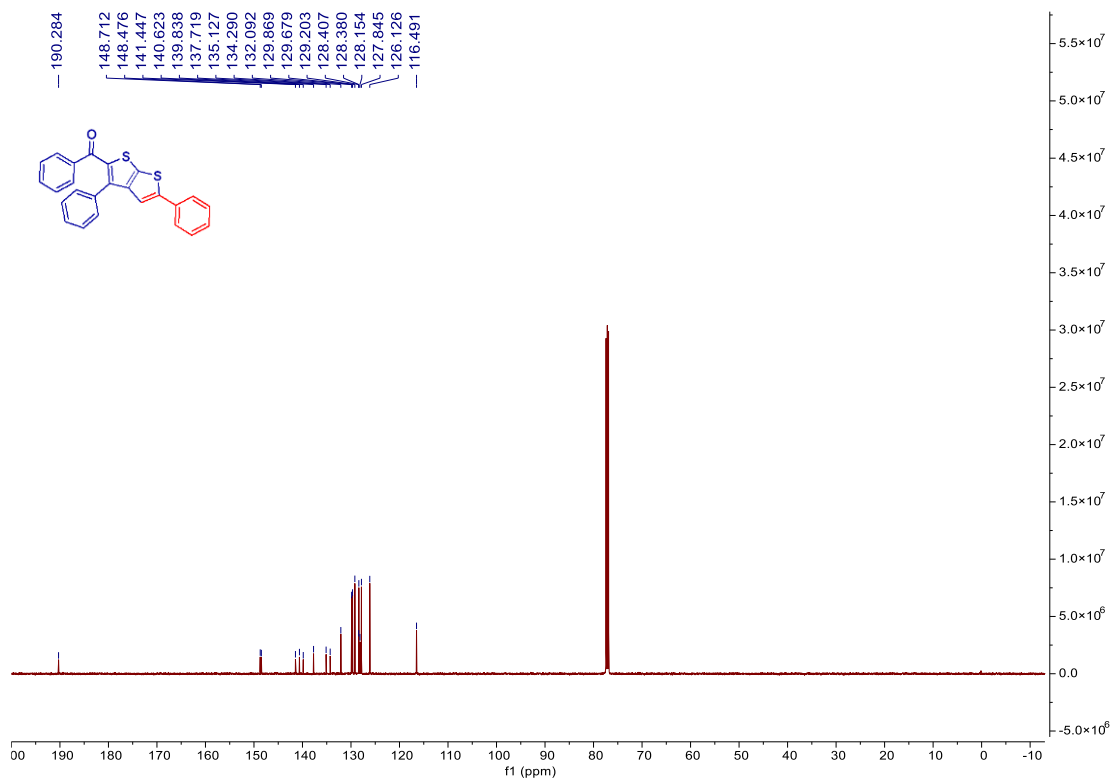

**<sup>13</sup>C NMR Spectrum of 3n (CDCl<sub>3</sub>, 125 MHz)**

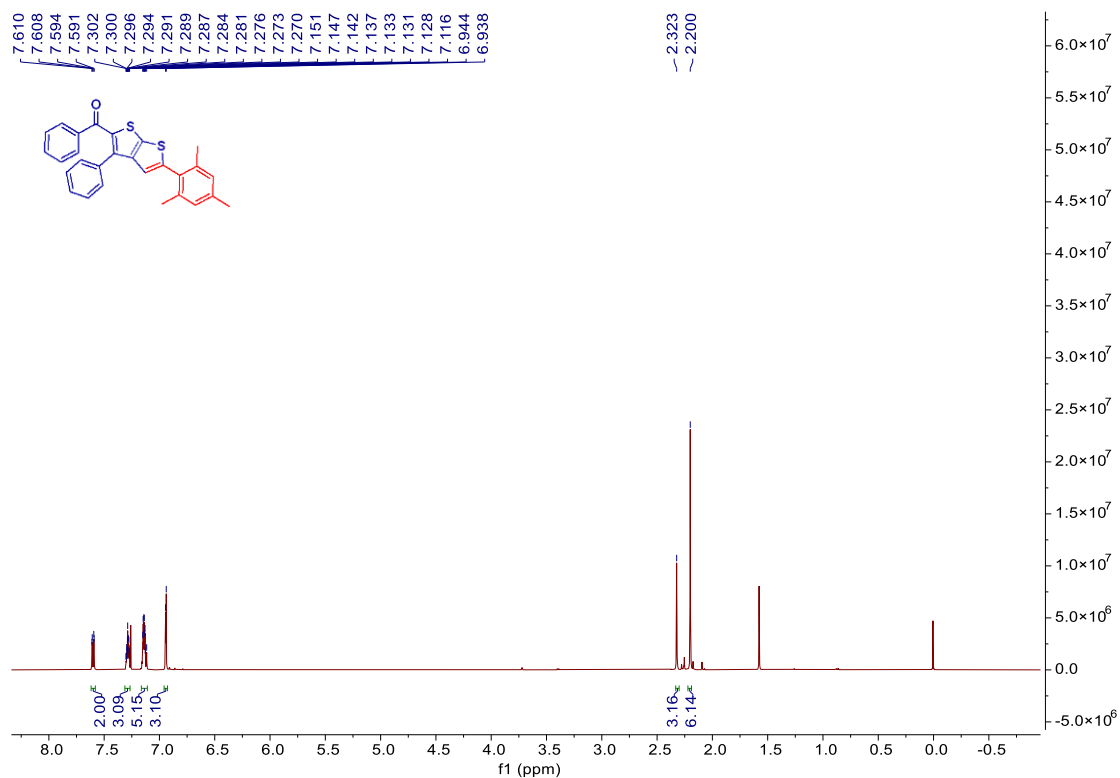

<sup>1</sup>H NMR Spectrum of 3o (CDCl<sub>3</sub>, 500 MHz)

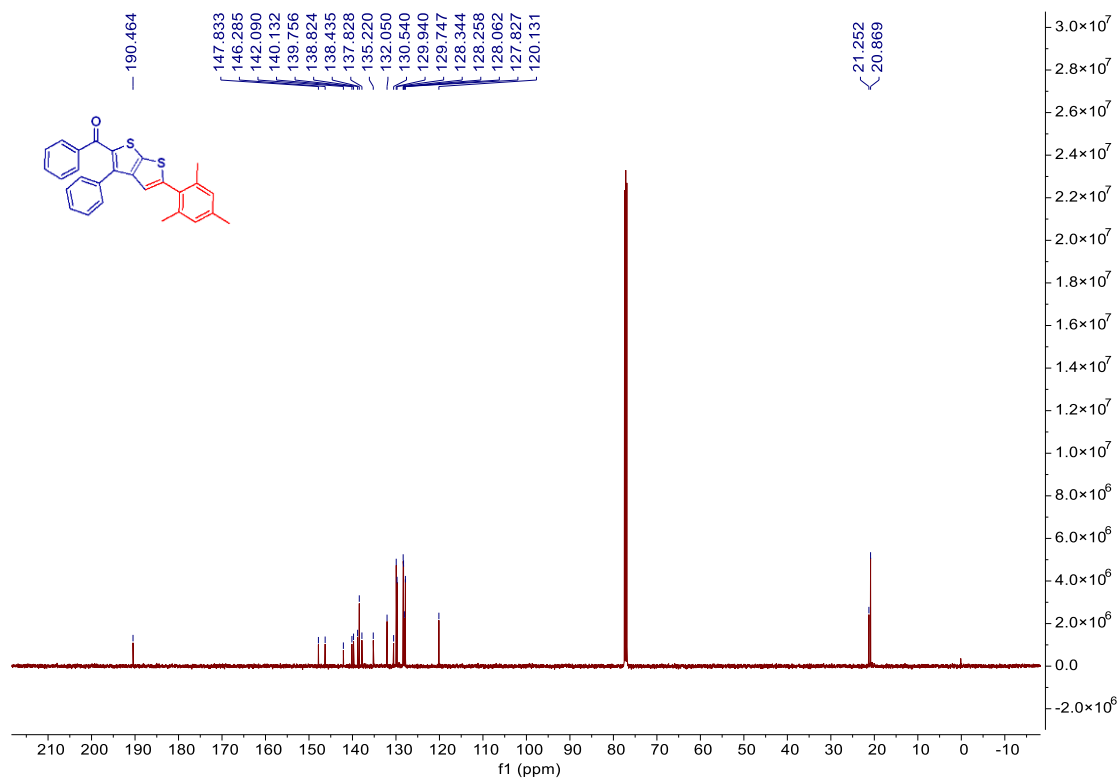

<sup>13</sup>C NMR Spectrum of 3o (CDCl<sub>3</sub>, 125 MHz)

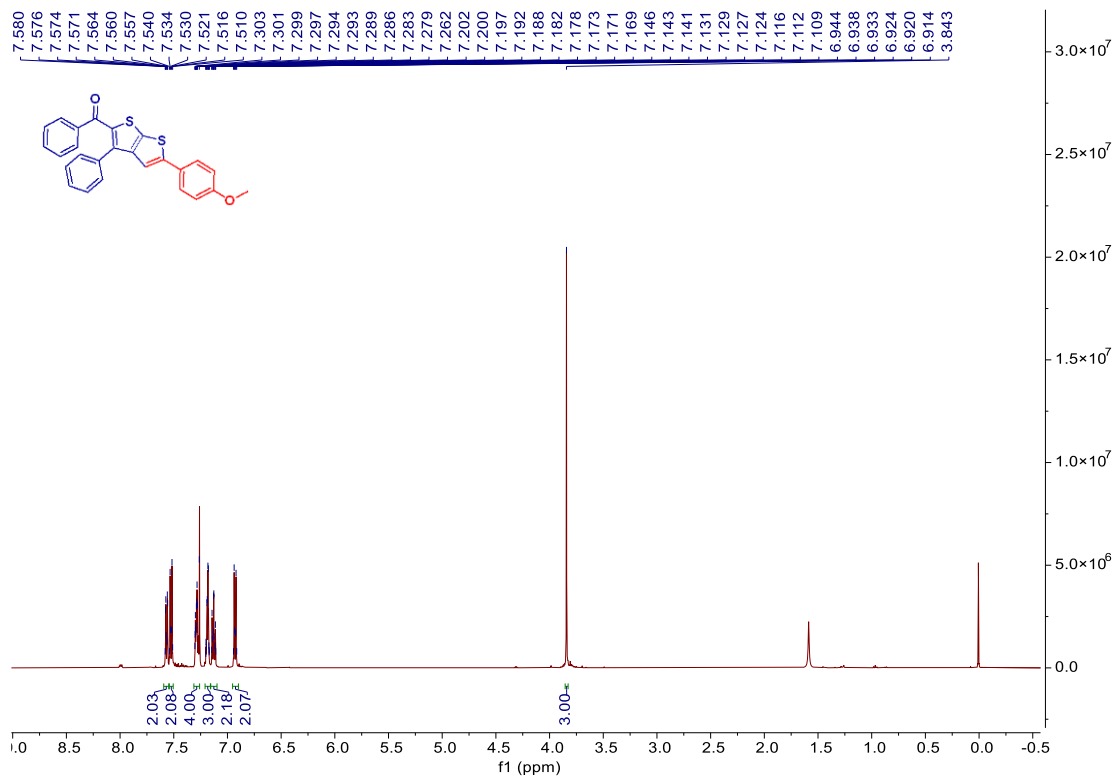

<sup>1</sup>H NMR Spectrum of 3p (CDCl<sub>3</sub>, 500 MHz)

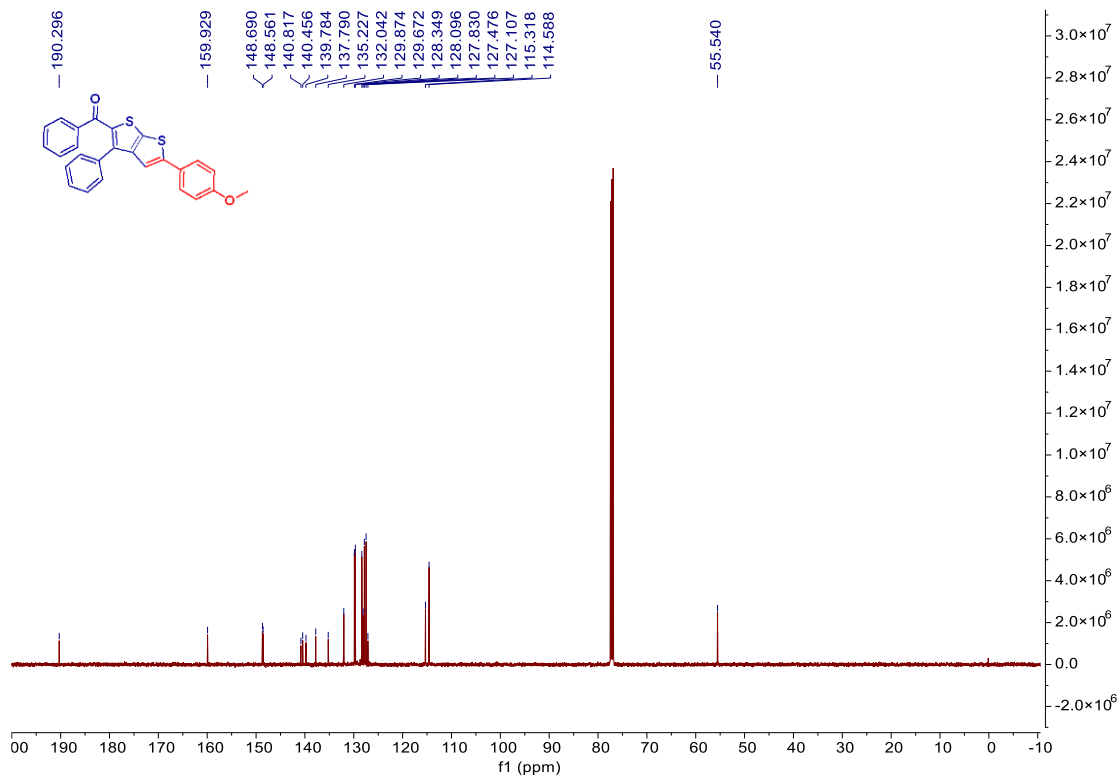

<sup>13</sup>C NMR Spectrum of 3p (CDCl<sub>3</sub>, 125 MHz)

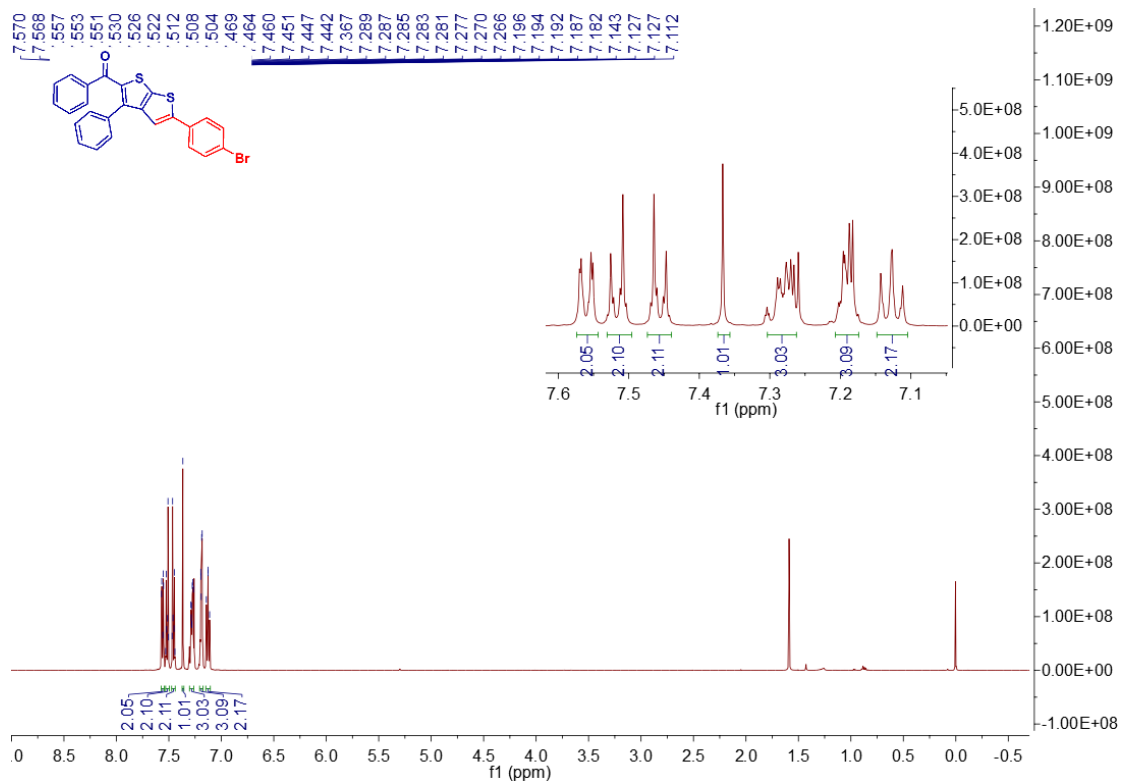

<sup>1</sup>H NMR Spectrum of 3q (CDCl<sub>3</sub>, 500 MHz)

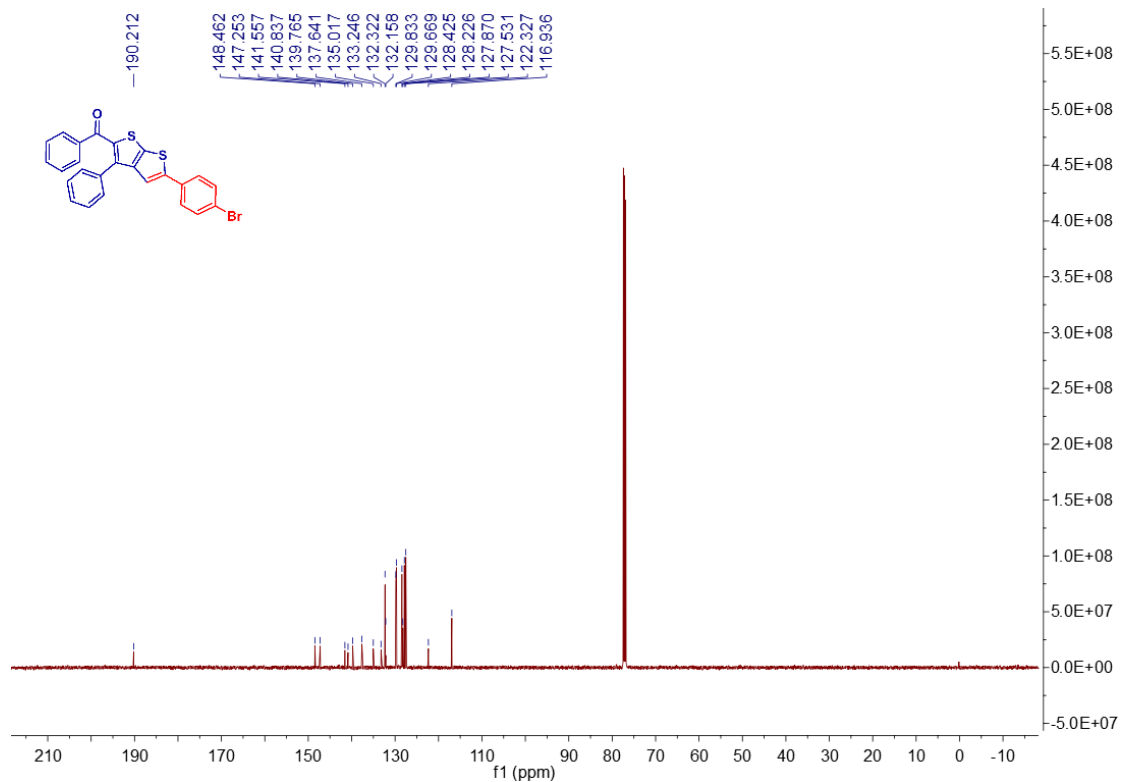

<sup>13</sup>C NMR Spectrum of 3q (CDCl<sub>3</sub>, 125 MHz)

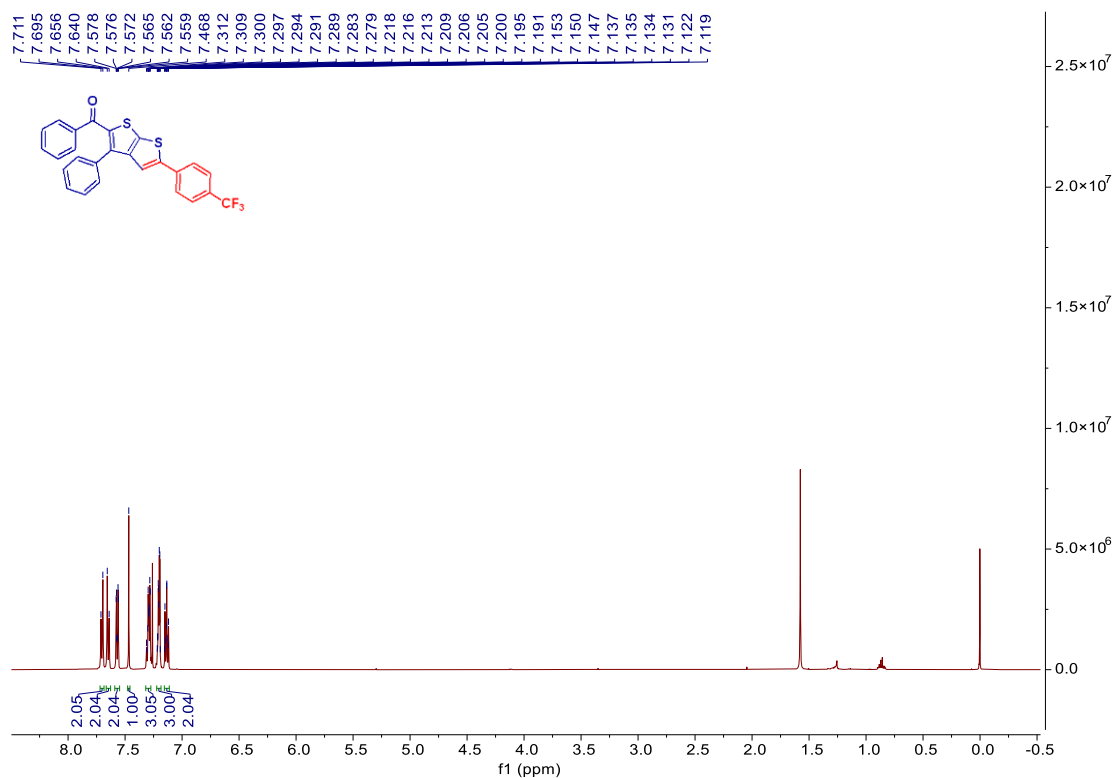

<sup>1</sup>H NMR Spectrum of 3r (CDCl<sub>3</sub>, 500 MHz)

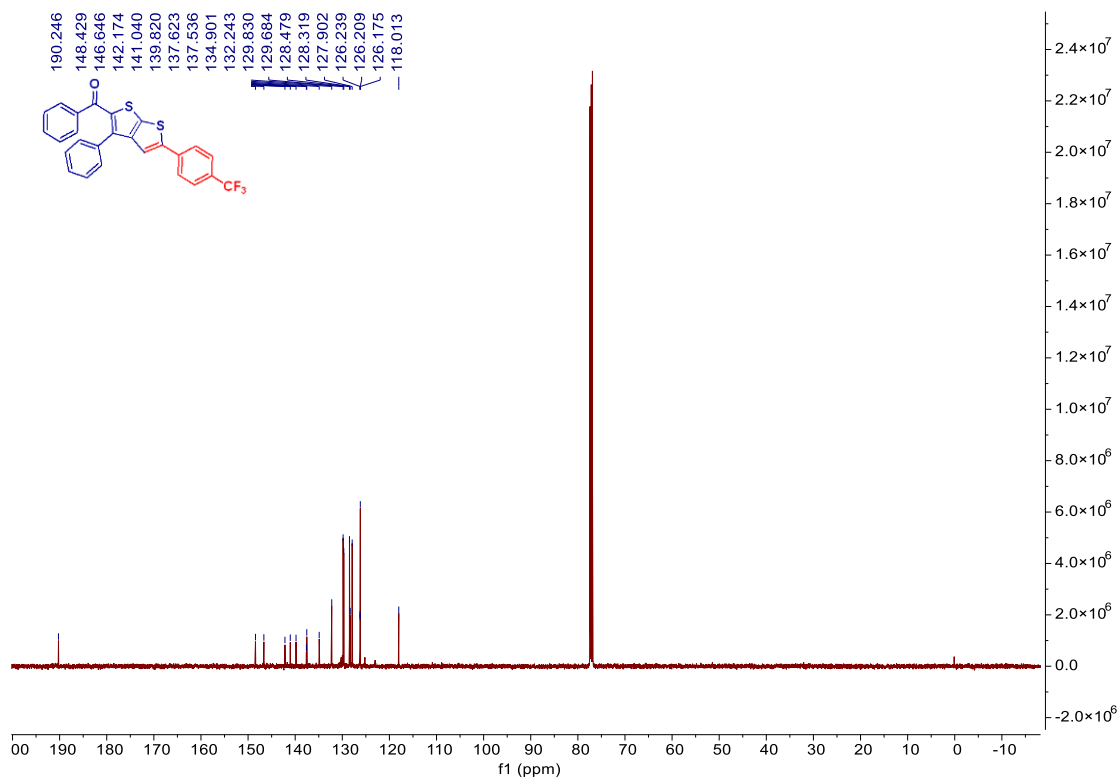

<sup>13</sup>C NMR Spectrum of 3r (CDCl<sub>3</sub>, 125 MHz)

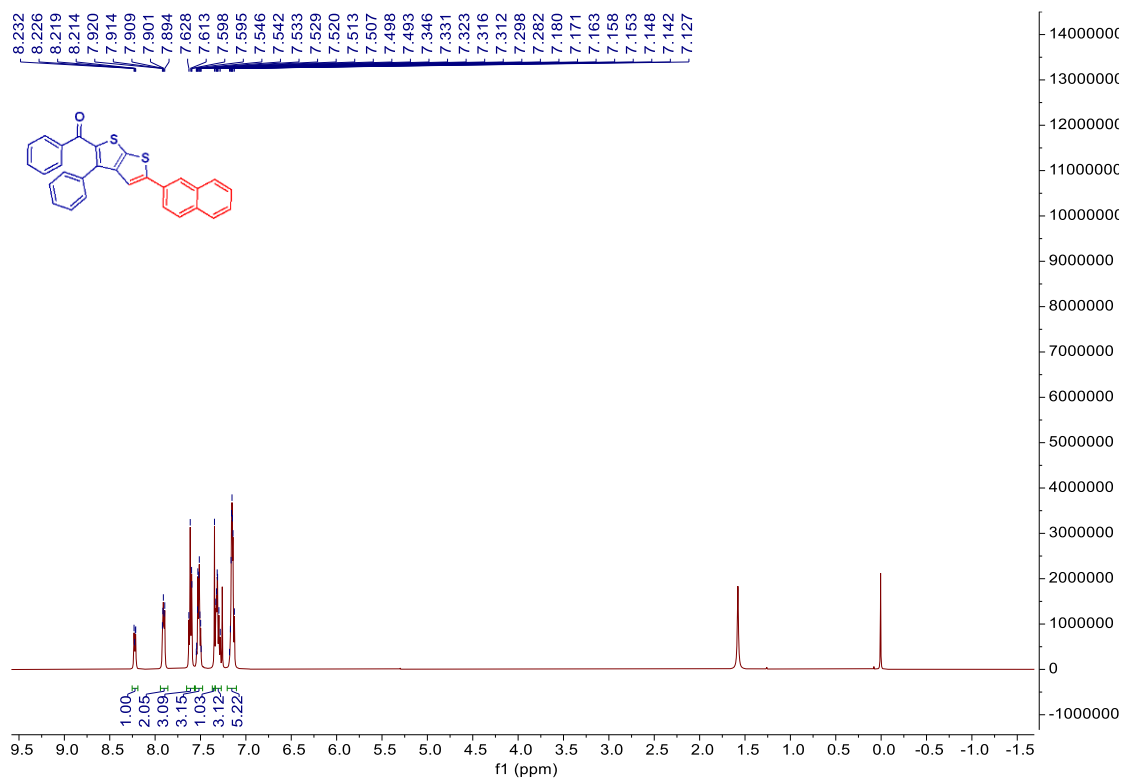

<sup>1</sup>H NMR Spectrum of 3s (CDCl<sub>3</sub>, 500 MHz)

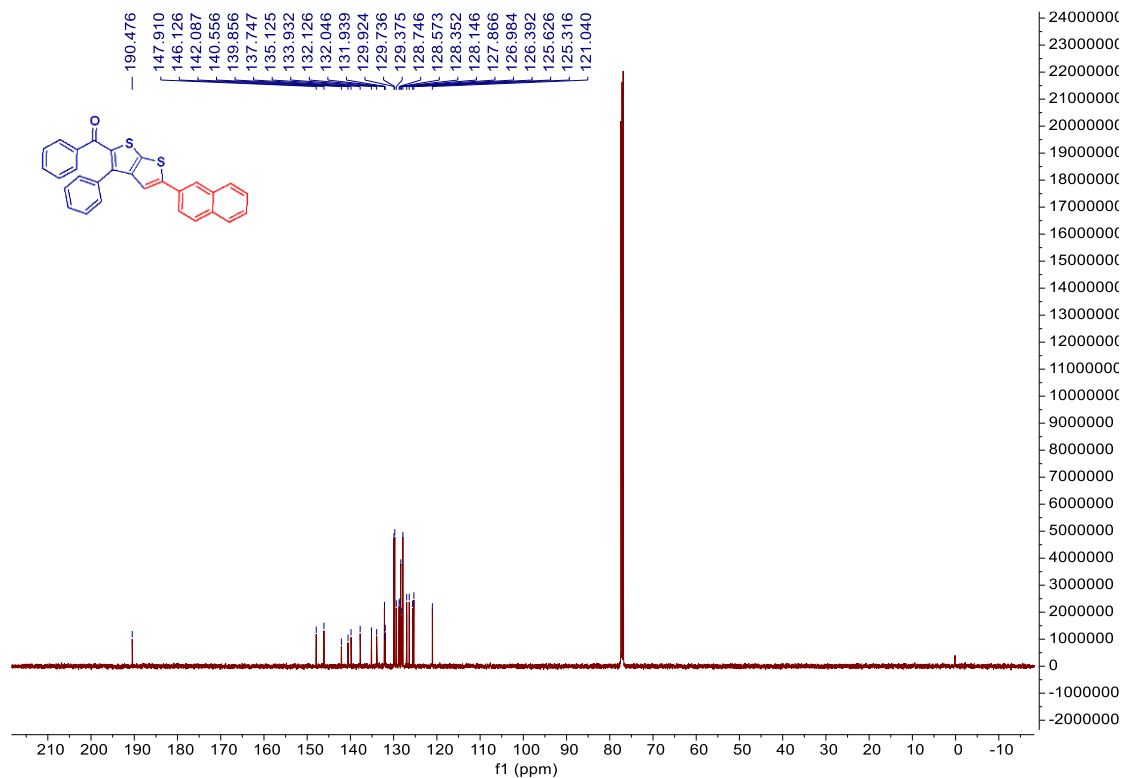

<sup>13</sup>C NMR Spectrum of 3s (CDCl<sub>3</sub>, 125 MHz)

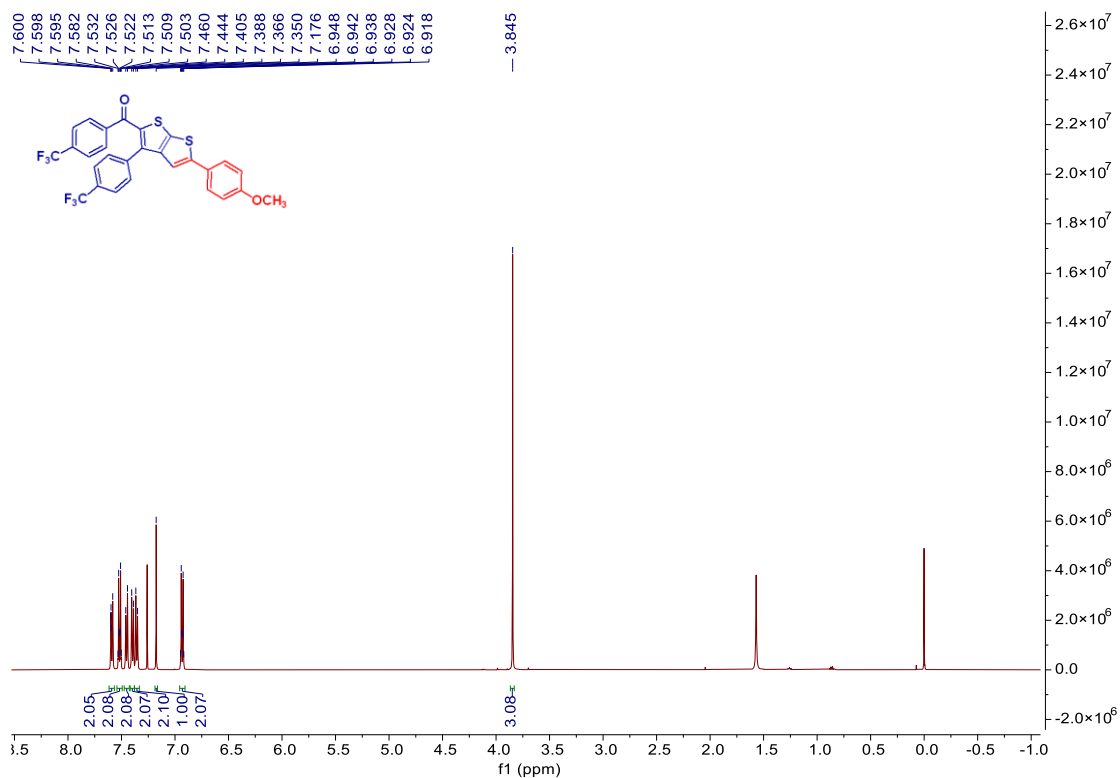

<sup>1</sup>H NMR Spectrum of 3t (CDCl<sub>3</sub>, 500 MHz)

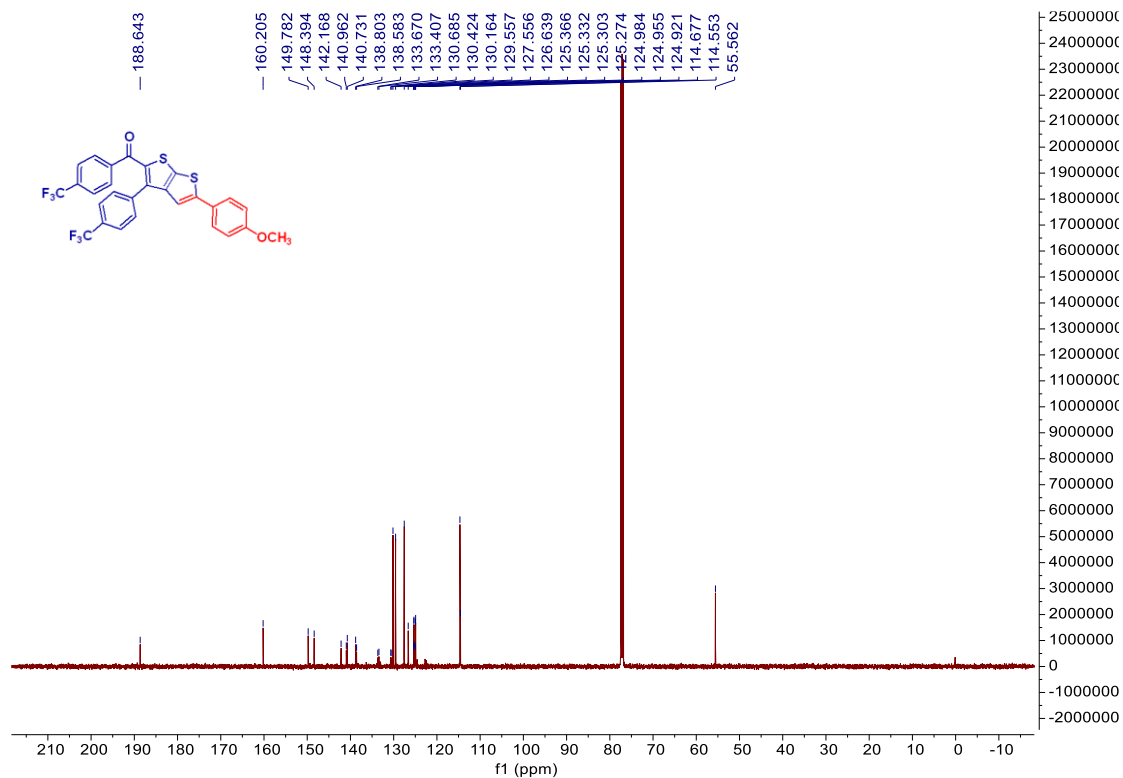

<sup>13</sup>C NMR Spectrum of 3t (CDCl<sub>3</sub>, 125 MHz)

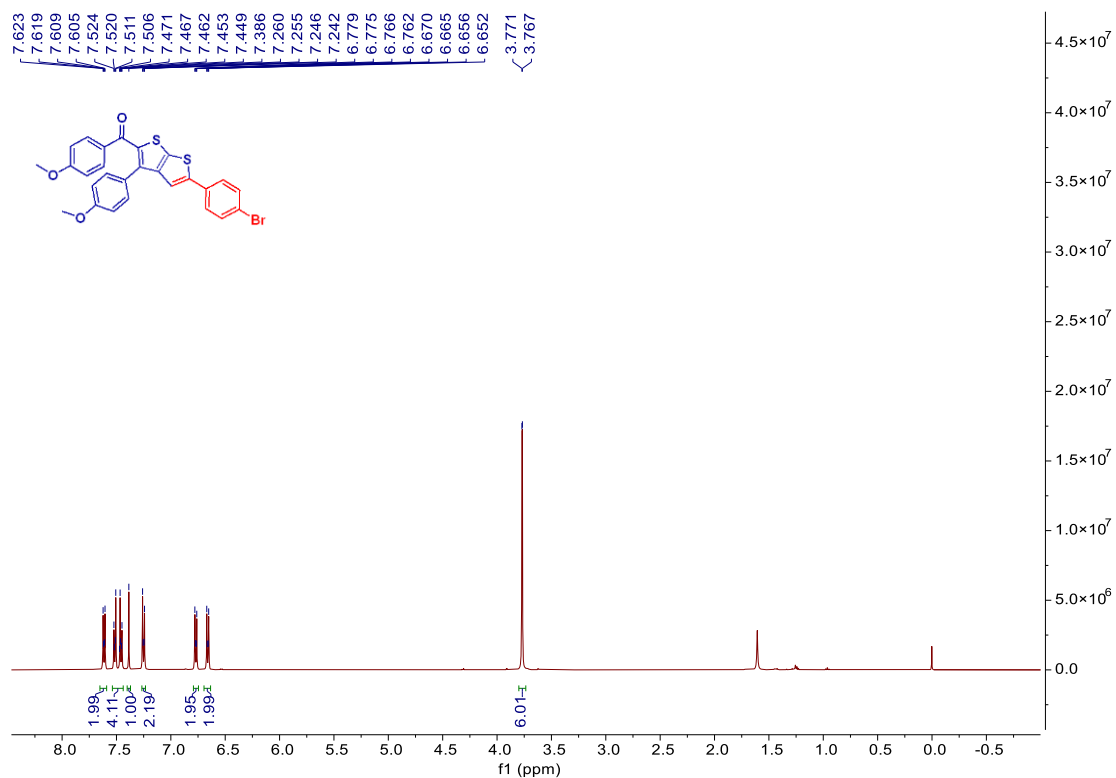

<sup>1</sup>H NMR Spectrum of 3u (CDCl<sub>3</sub>, 500 MHz)

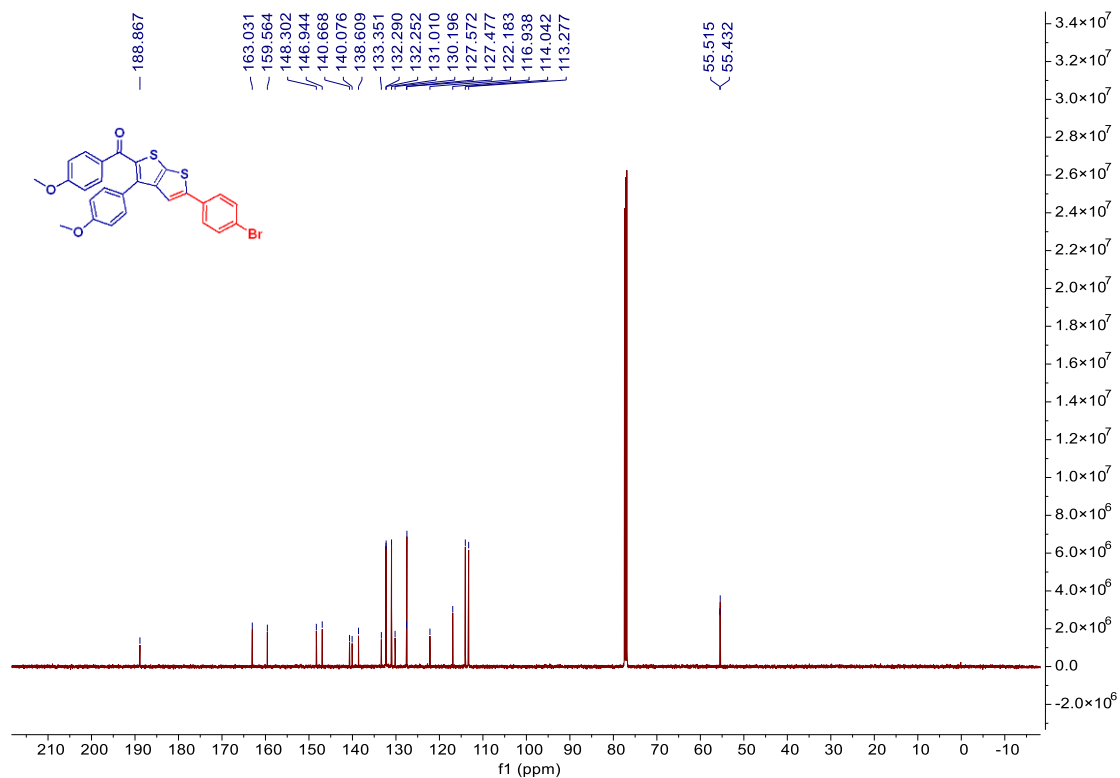

<sup>13</sup>C NMR Spectrum of 3u (CDCl<sub>3</sub>, 125 MHz)



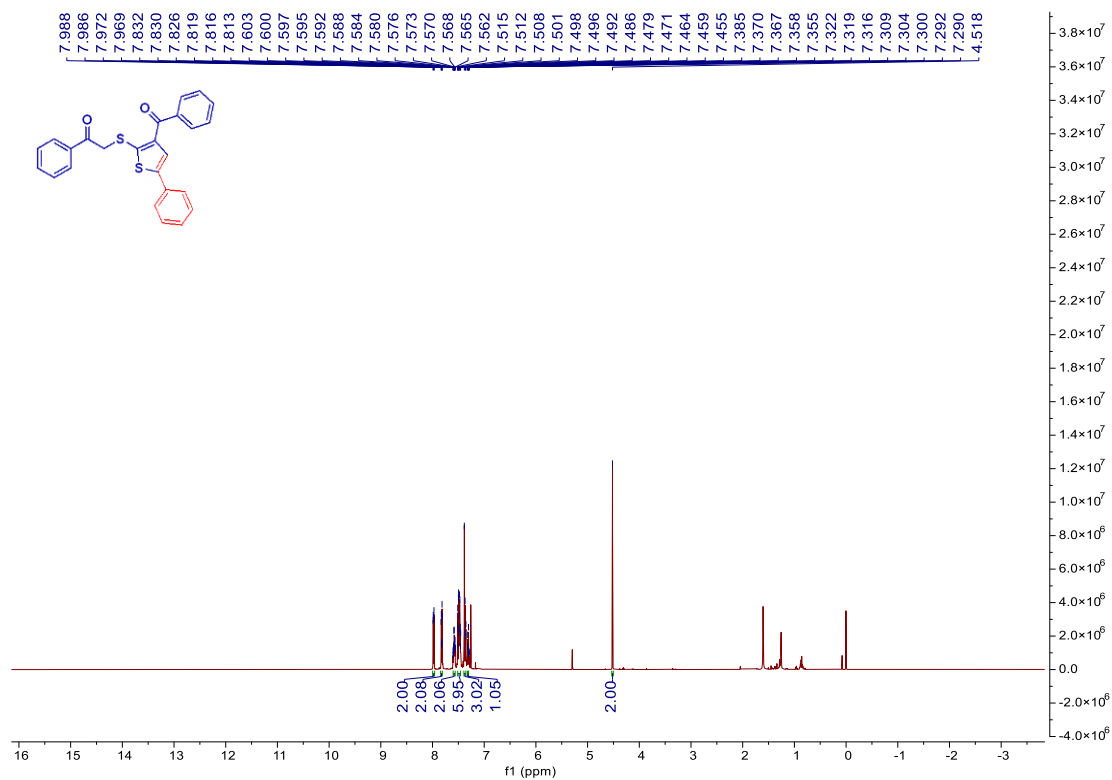

<sup>1</sup>H NMR Spectrum of 5a (CDCl<sub>3</sub>, 500 MHz)

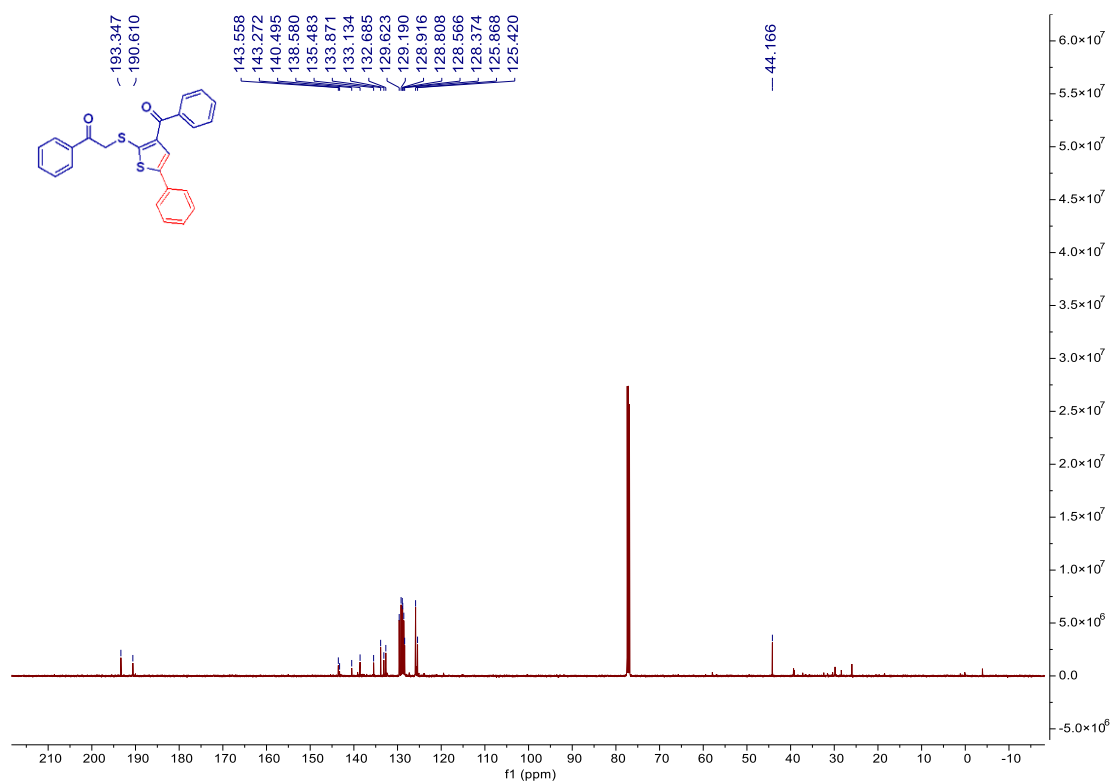

<sup>13</sup>C NMR Spectrum of 5a (CDCl<sub>3</sub>, 125 MHz)

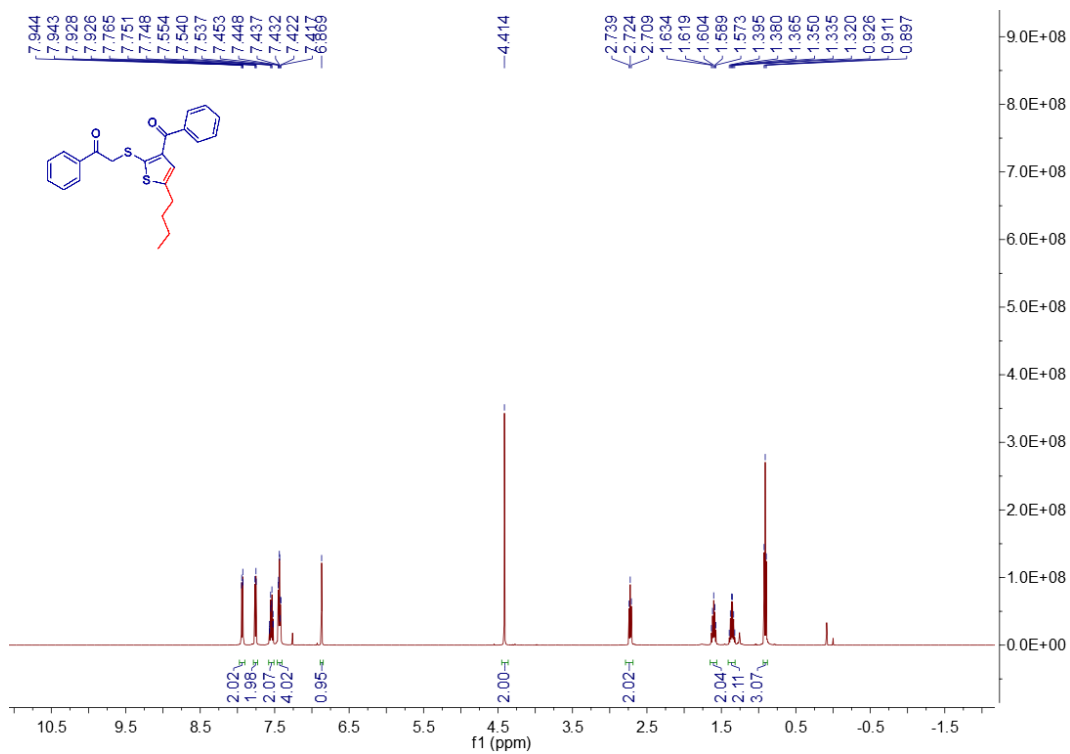

<sup>1</sup>H NMR Spectrum of 5b (CDCl<sub>3</sub>, 500 MHz)

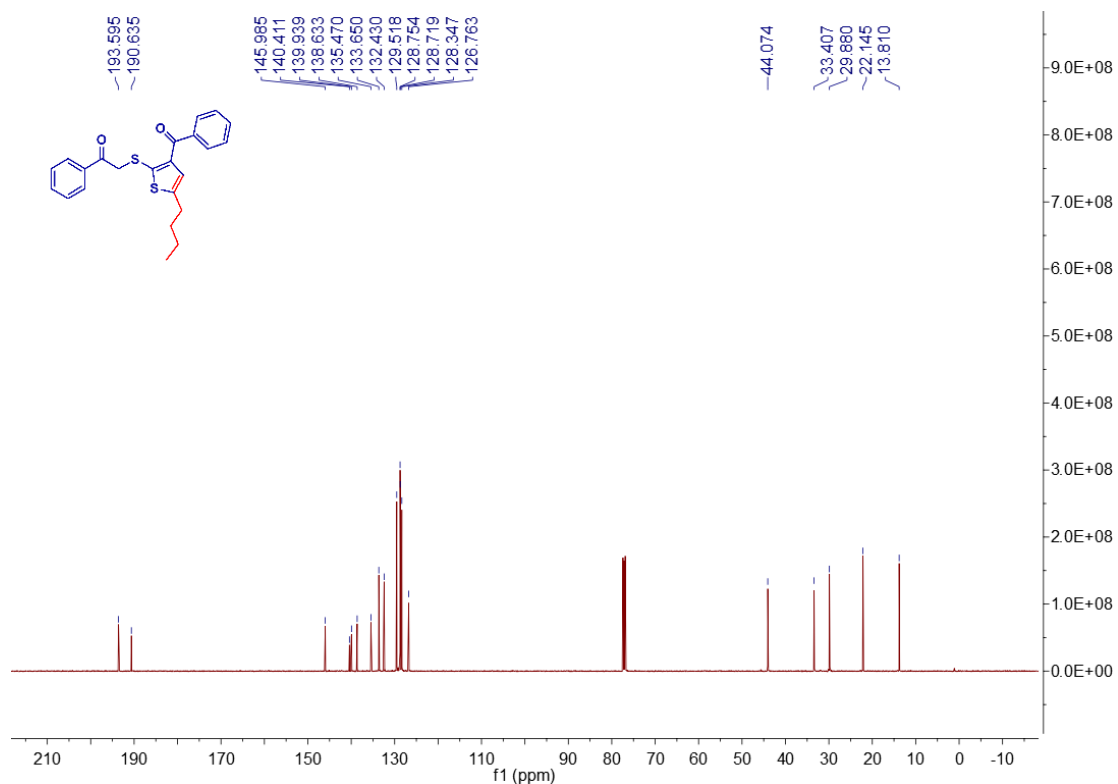

<sup>13</sup>C NMR Spectrum of 5b (CDCl<sub>3</sub>, 125 MHz)

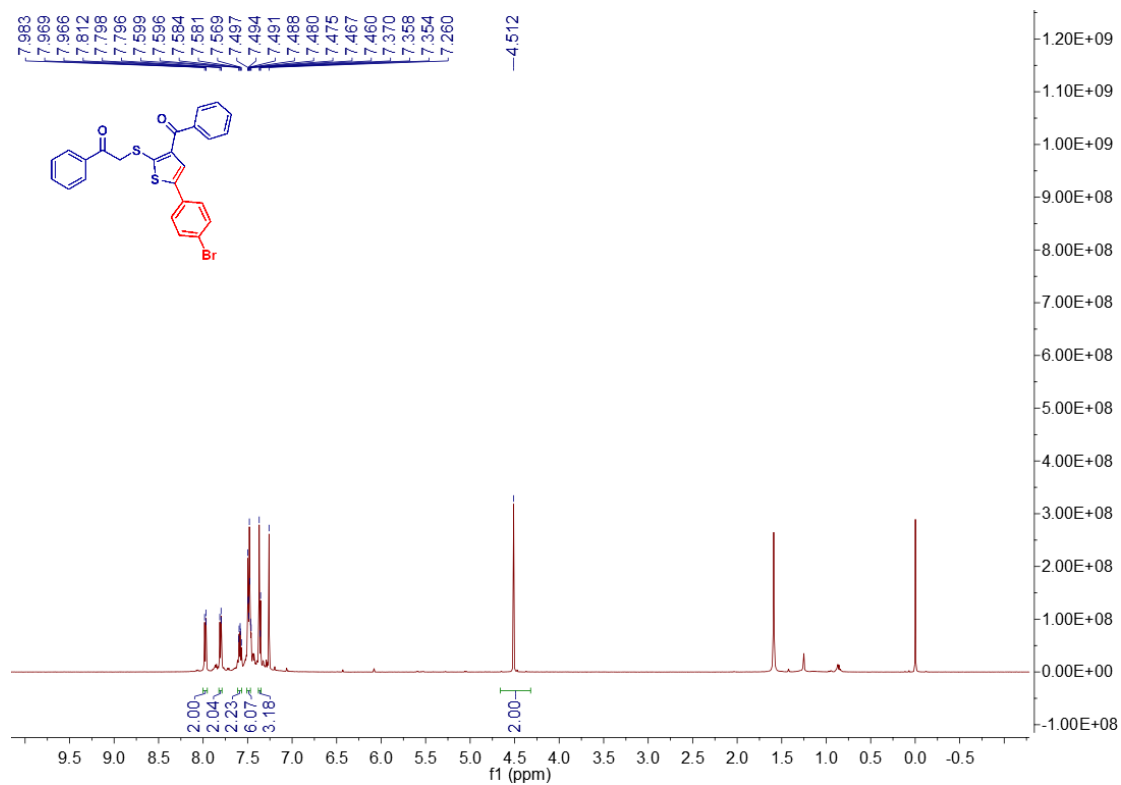

<sup>1</sup>H NMR Spectrum of 5c (CDCl<sub>3</sub>, 500 MHz)

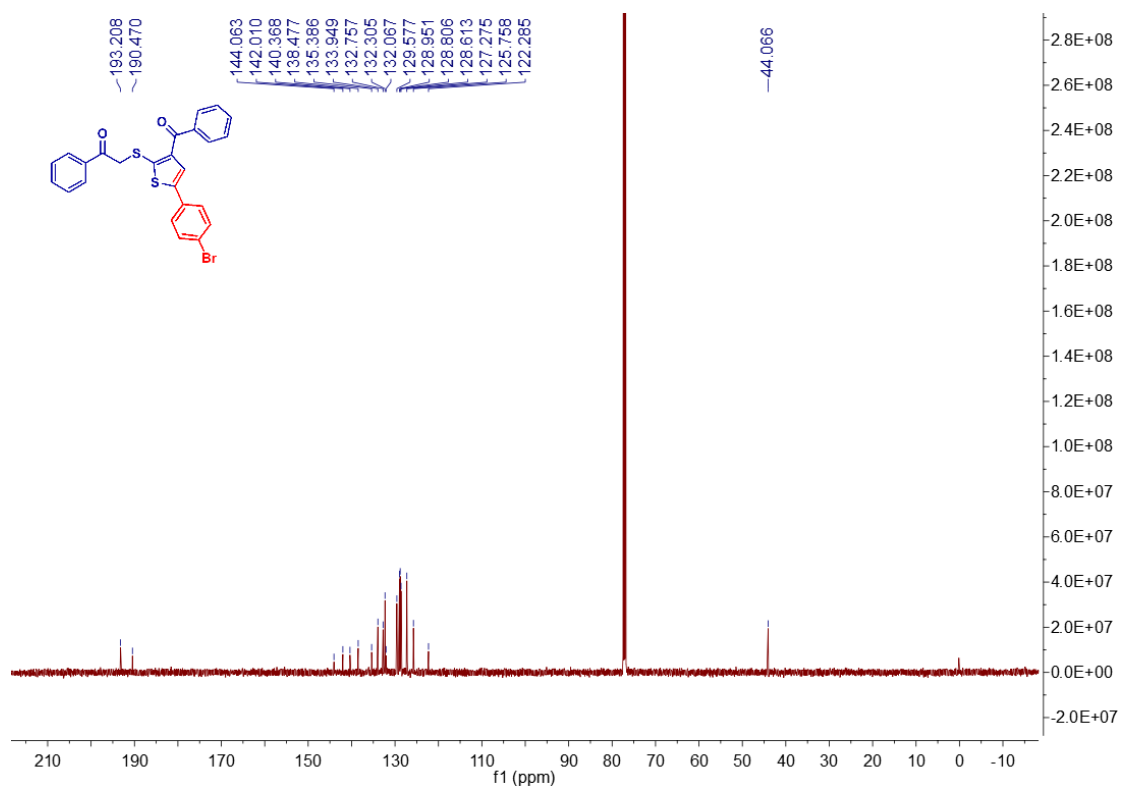

<sup>13</sup>C NMR Spectrum of 5c (CDCl<sub>3</sub>, 125 MHz)

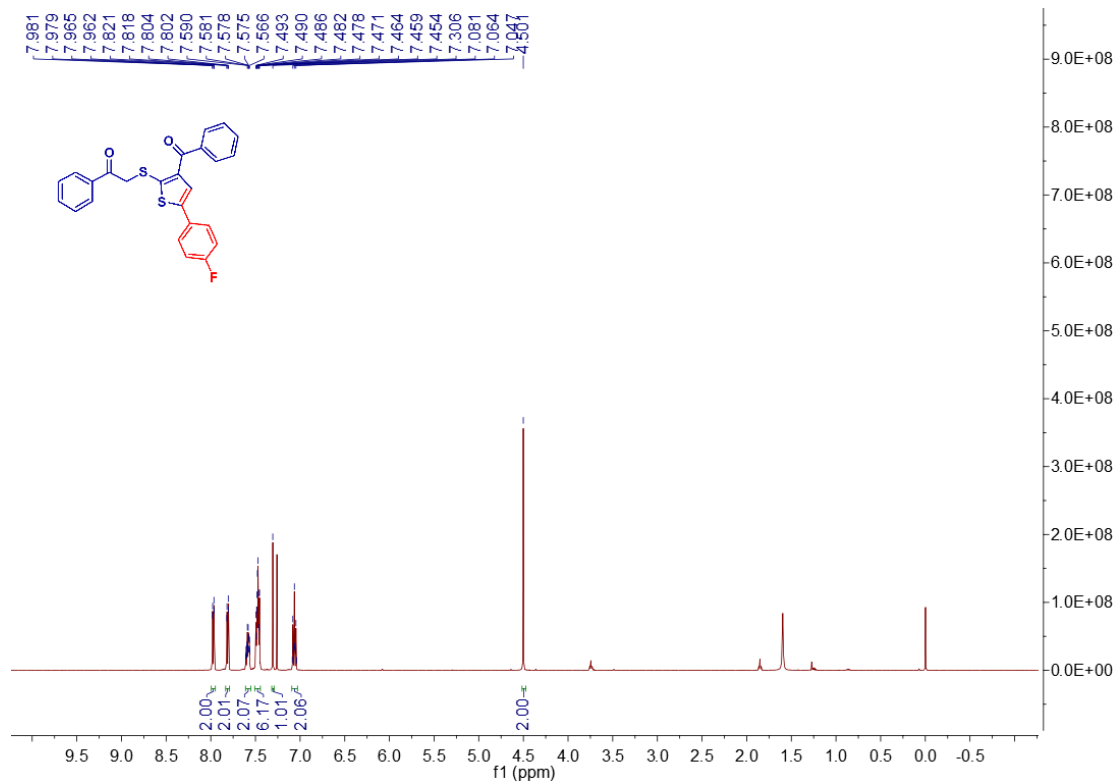

<sup>1</sup>H NMR Spectrum of 5d (CDCl<sub>3</sub>, 500 MHz)

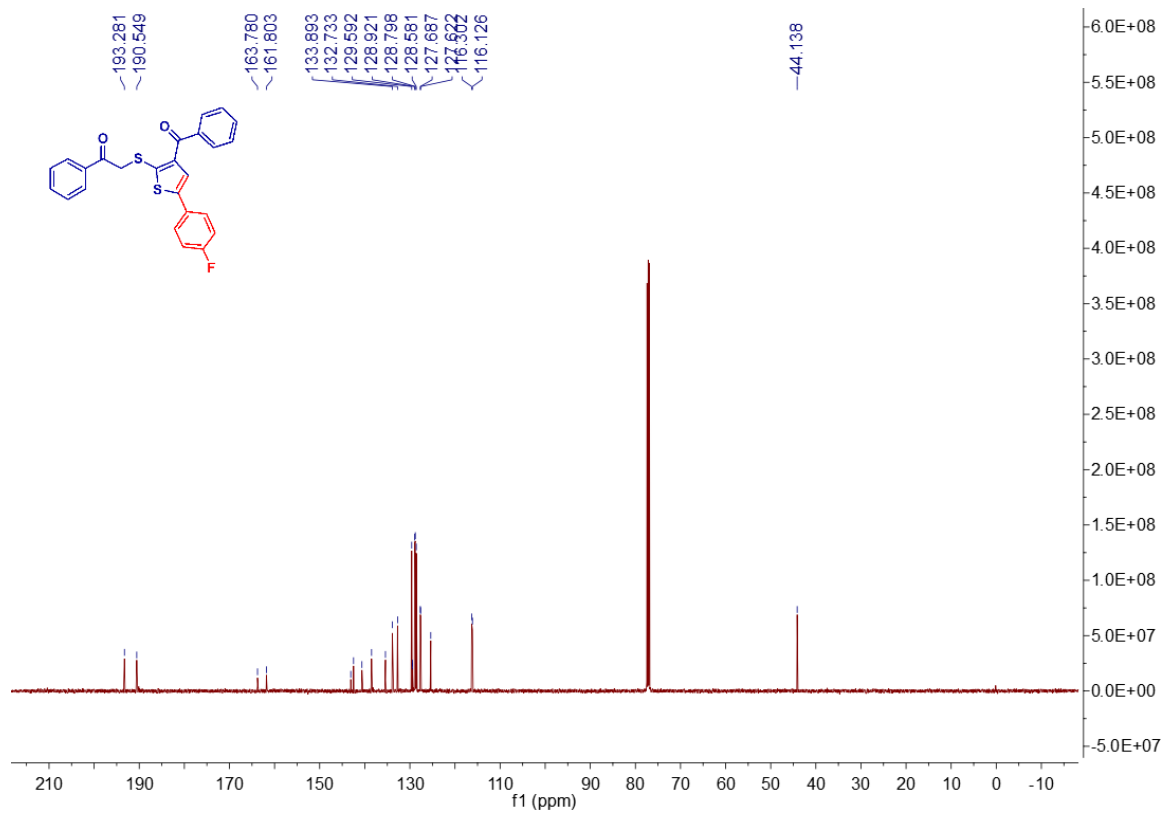

<sup>13</sup>C NMR Spectrum of 5d (CDCl<sub>3</sub>, 125 MHz)

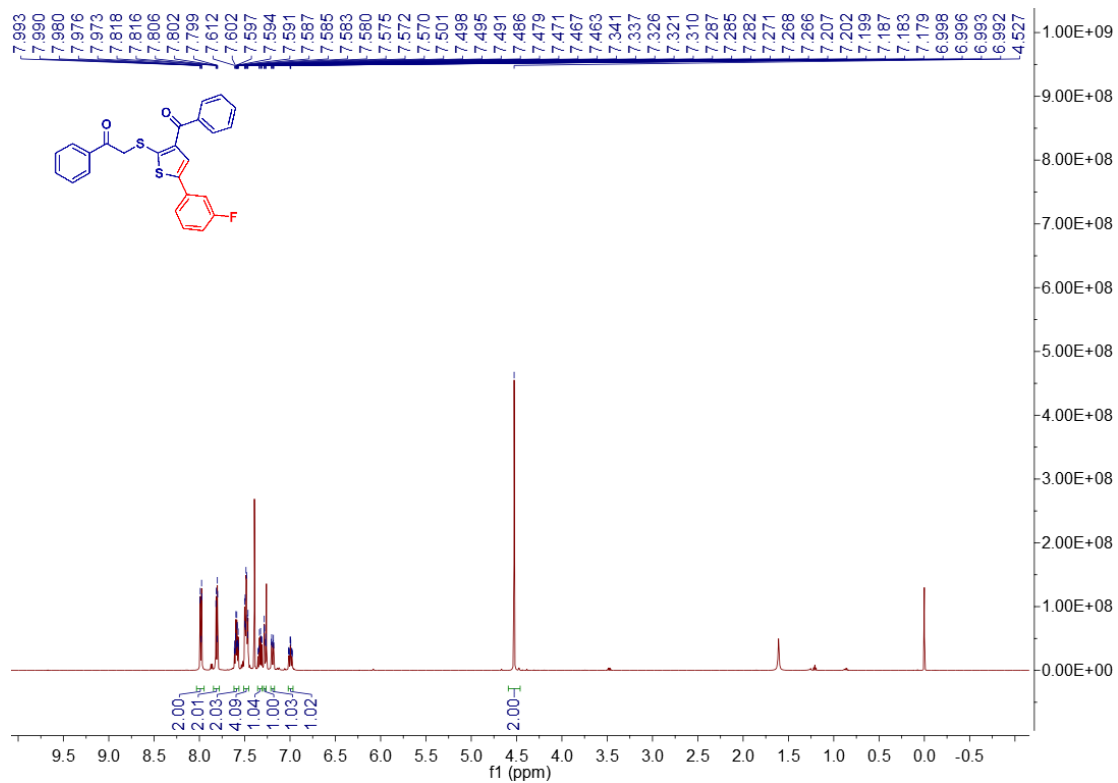

<sup>1</sup>H NMR Spectrum of 5e (CDCl<sub>3</sub>, 500 MHz)

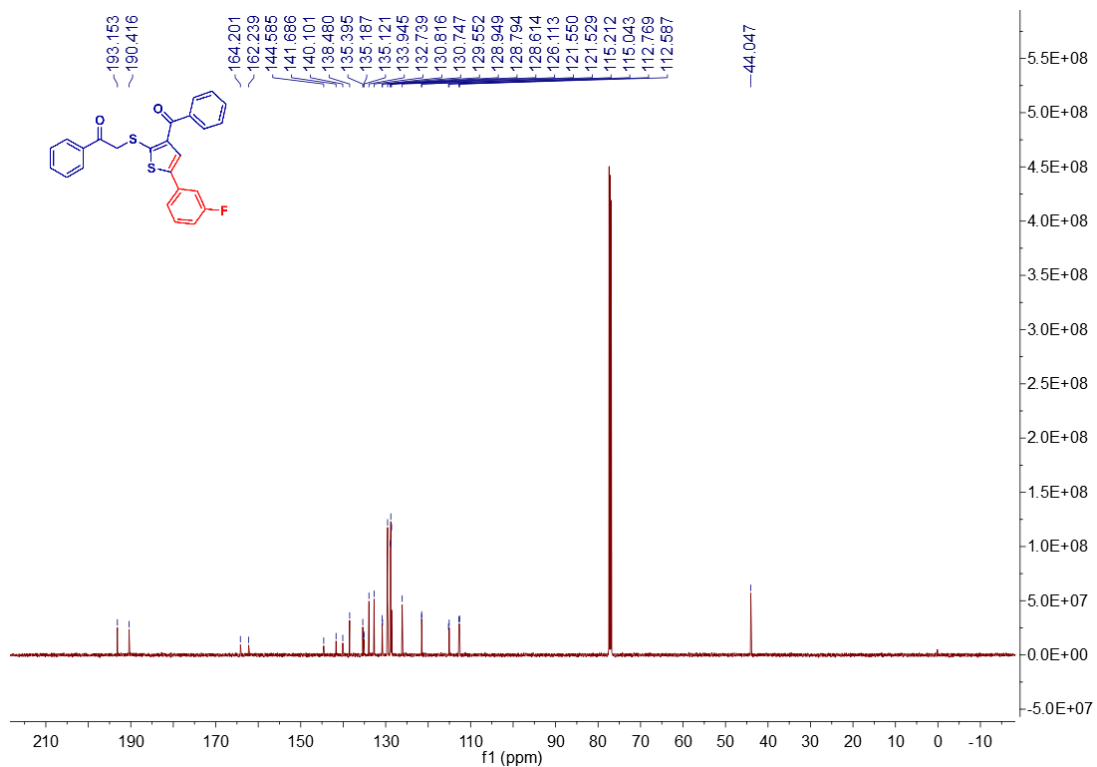

<sup>13</sup>C NMR Spectrum of 5e (CDCl<sub>3</sub>, 125 MHz)

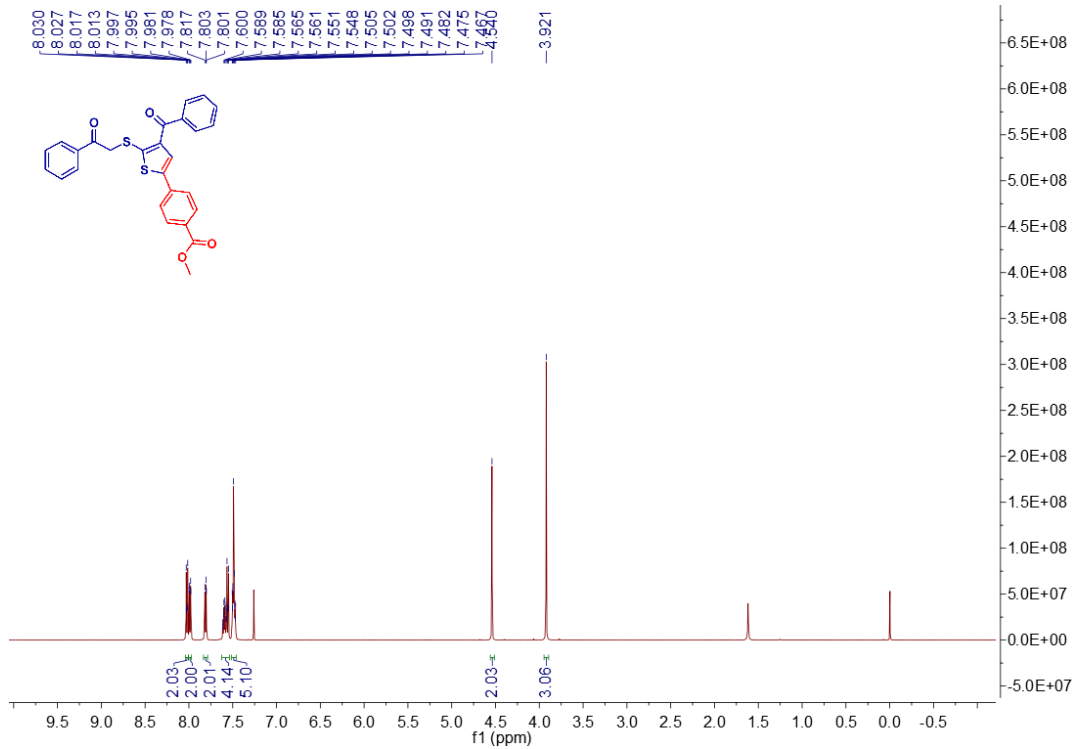

<sup>1</sup>H NMR Spectrum of 5g (CDCl<sub>3</sub>, 500 MHz)

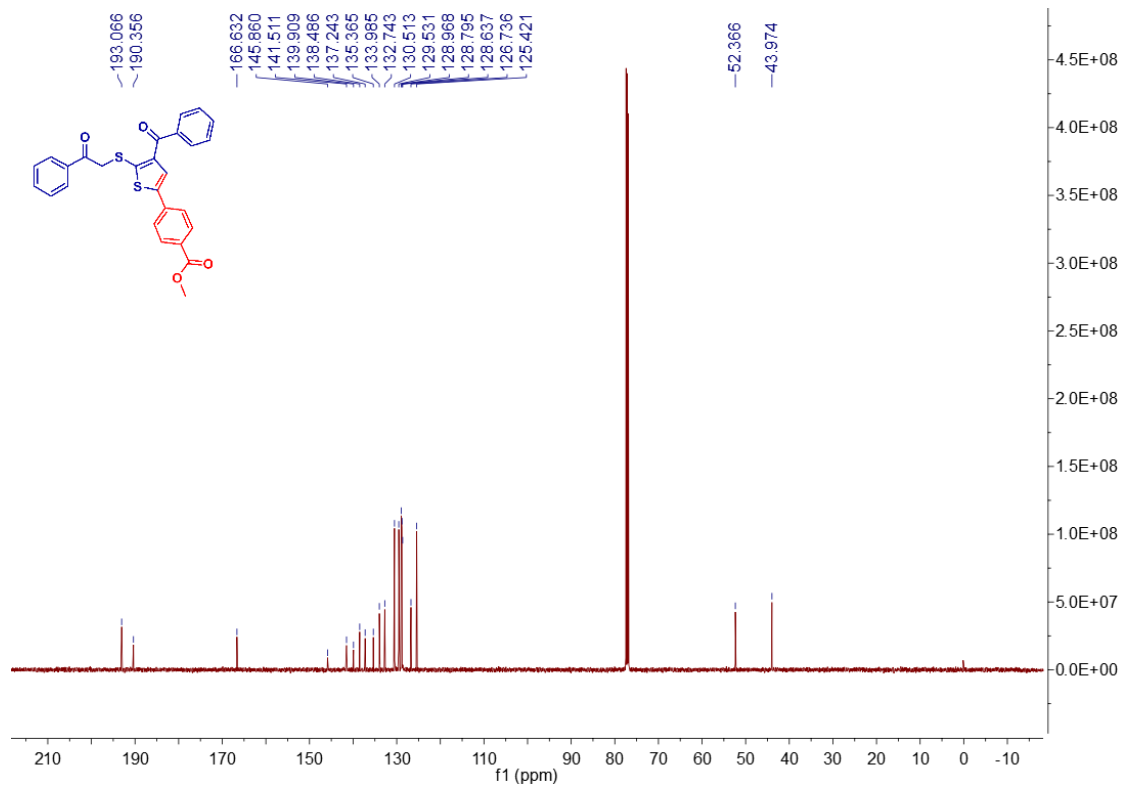

<sup>13</sup>C NMR Spectrum of 5g (CDCl<sub>3</sub>, 125 MHz)

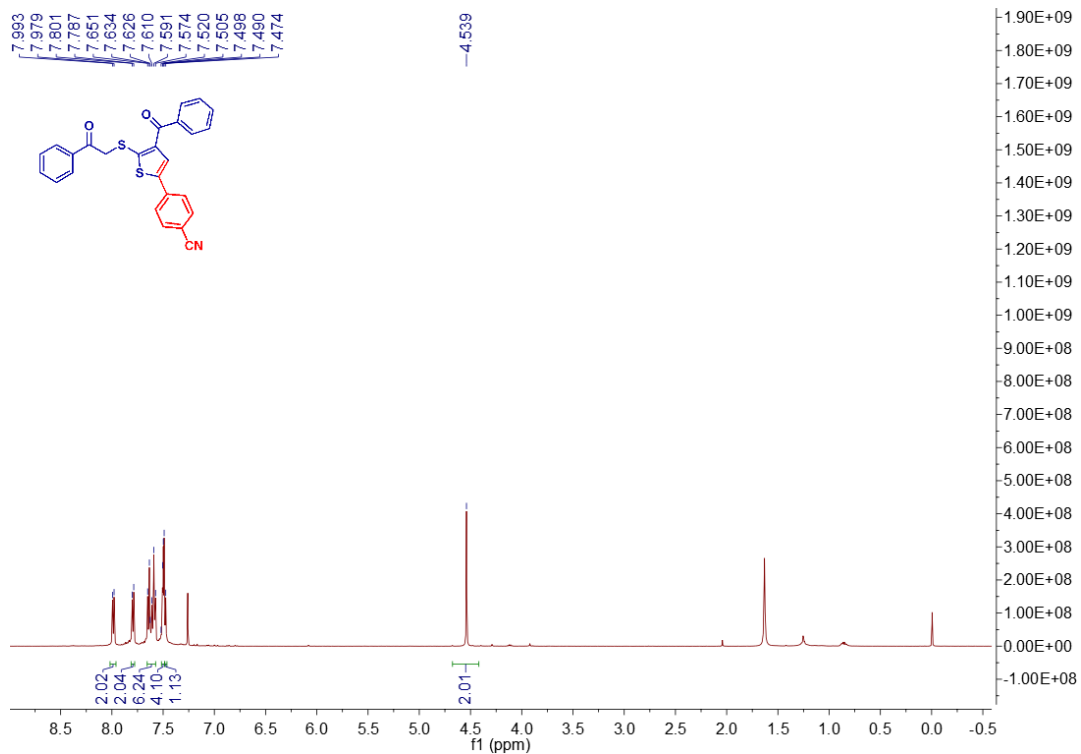

<sup>1</sup>H NMR Spectrum of 5h (CDCl<sub>3</sub>, 500 MHz)

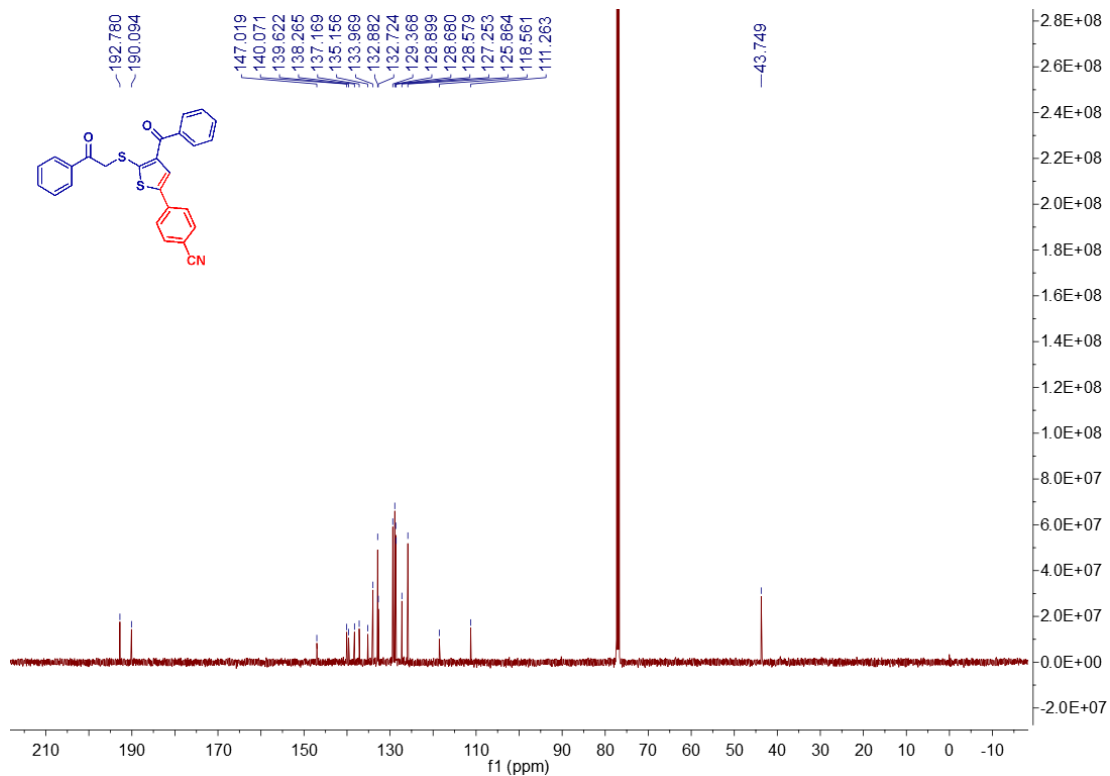

<sup>13</sup>C NMR Spectrum of 5h (CDCl<sub>3</sub>, 125 MHz)

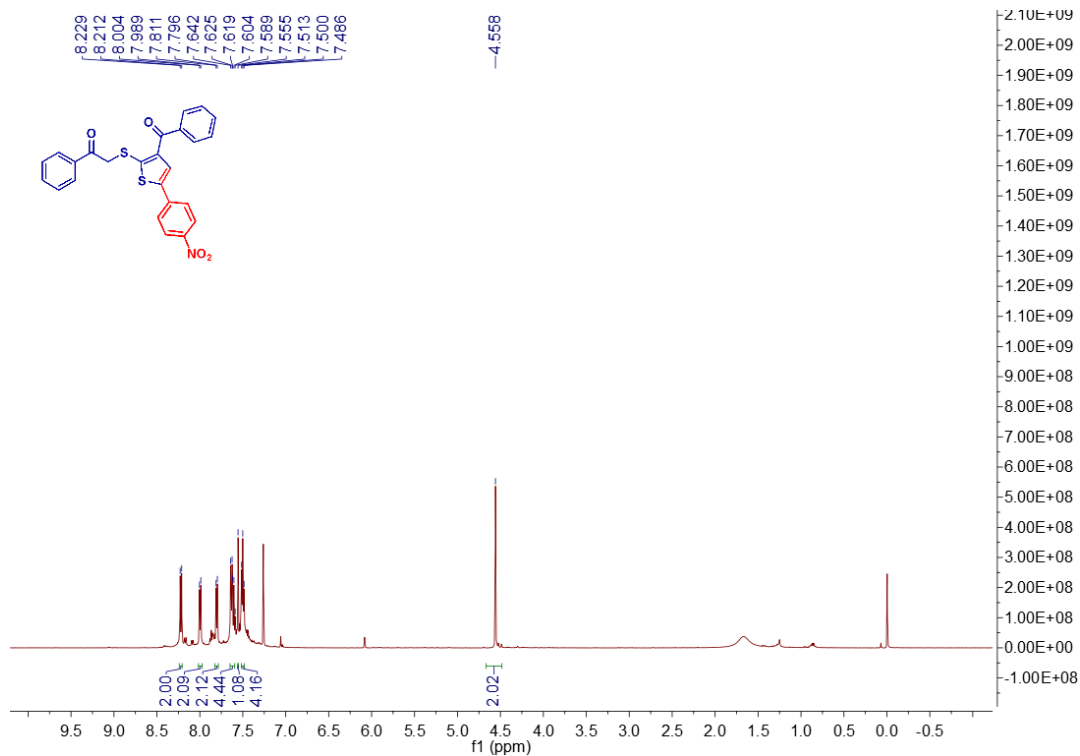

<sup>1</sup>H NMR Spectrum of 5i (CDCl<sub>3</sub>, 500 MHz)

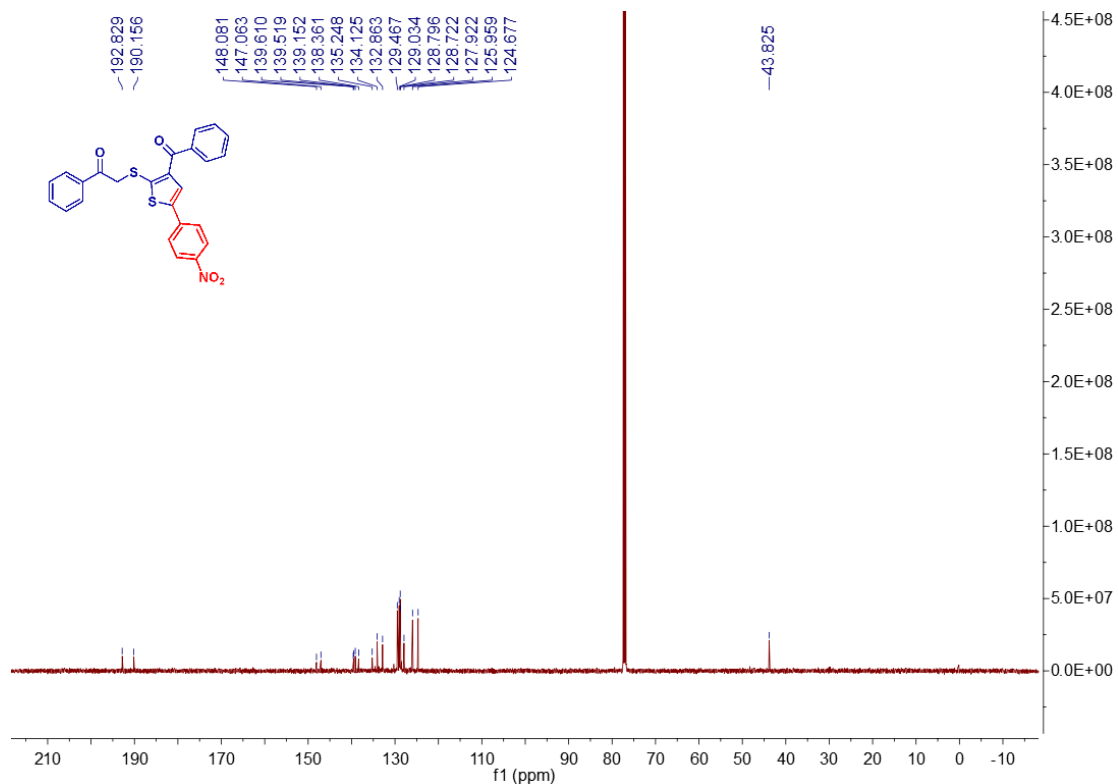

<sup>13</sup>C NMR Spectrum of 5i (CDCl<sub>3</sub>, 125 MHz)



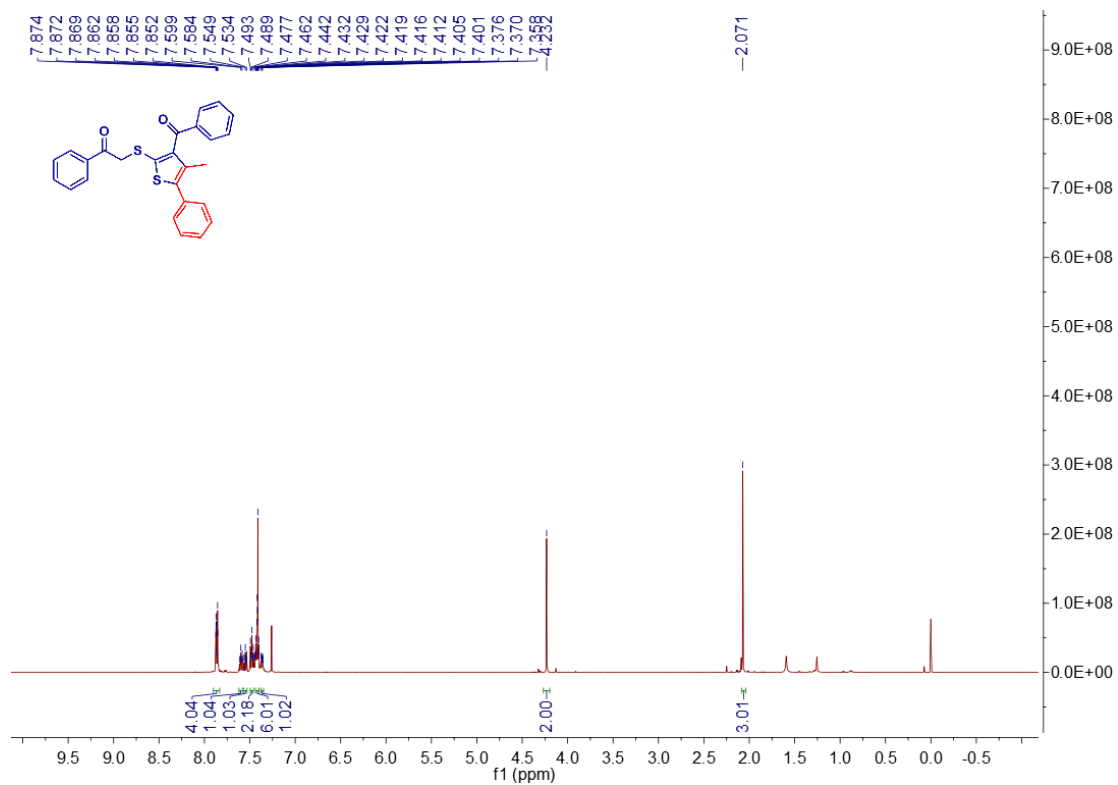

<sup>1</sup>H NMR Spectrum of 5j (CDCl<sub>3</sub>, 500 MHz)

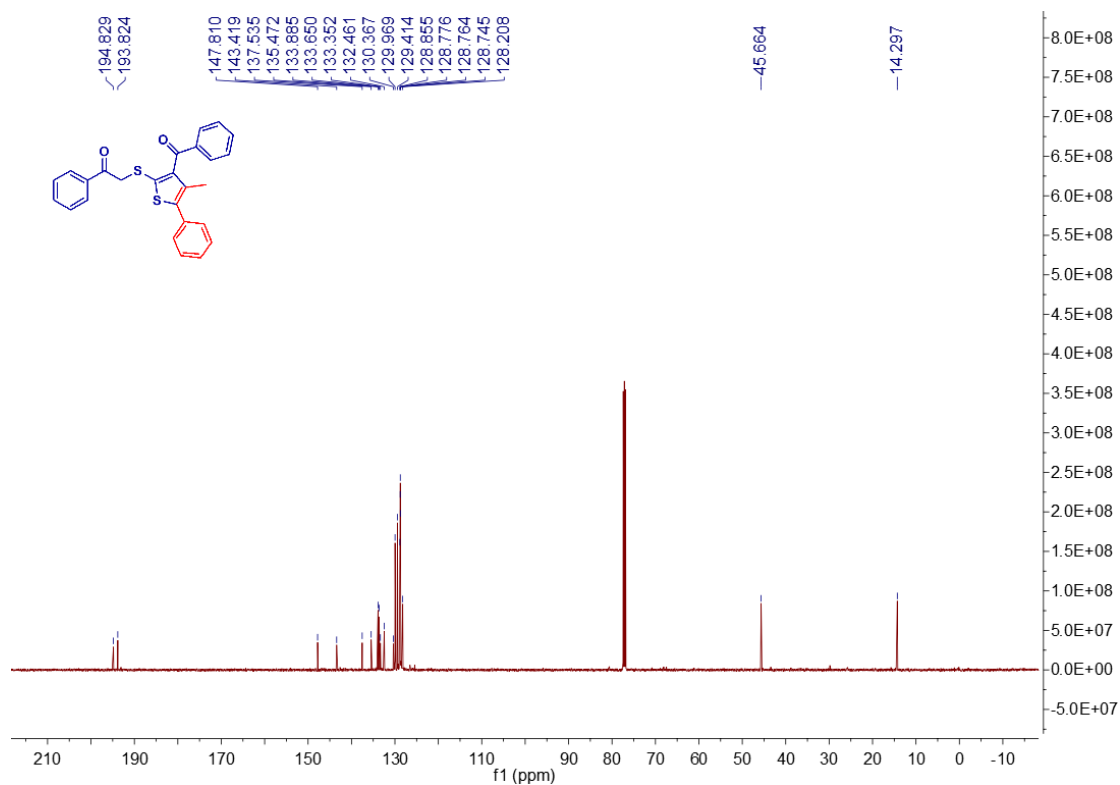

<sup>13</sup>C NMR Spectrum of 5j (CDCl<sub>3</sub>, 125 MHz)

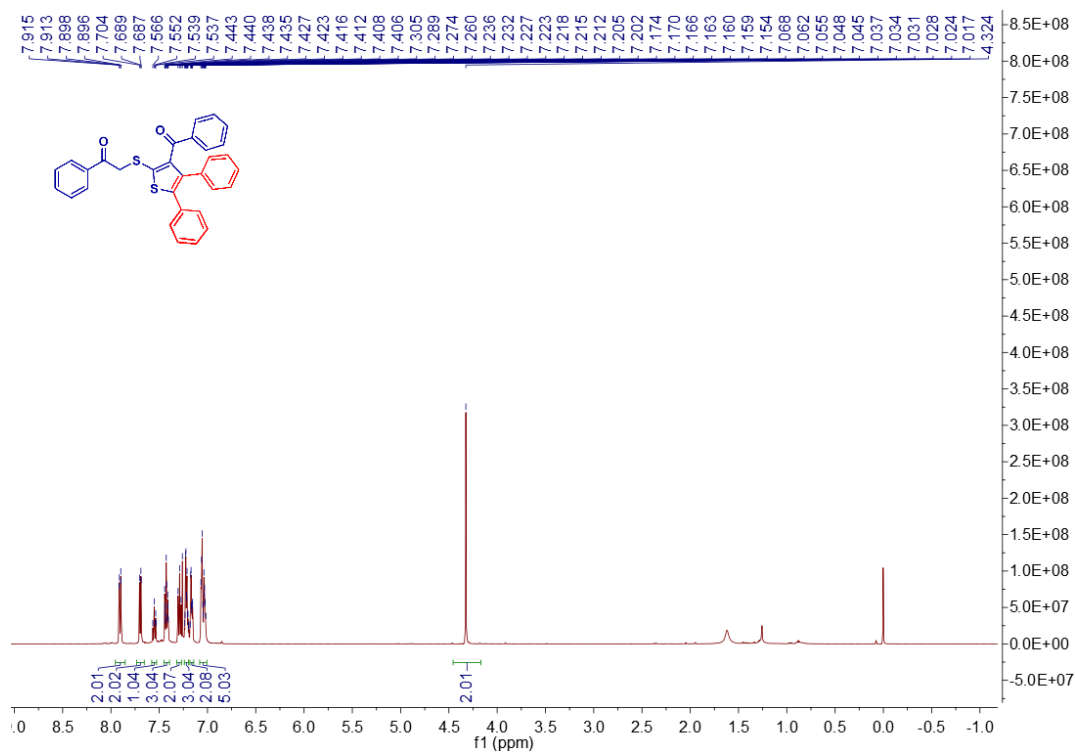

<sup>1</sup>H NMR Spectrum of 5k (CDCl<sub>3</sub>, 500 MHz)

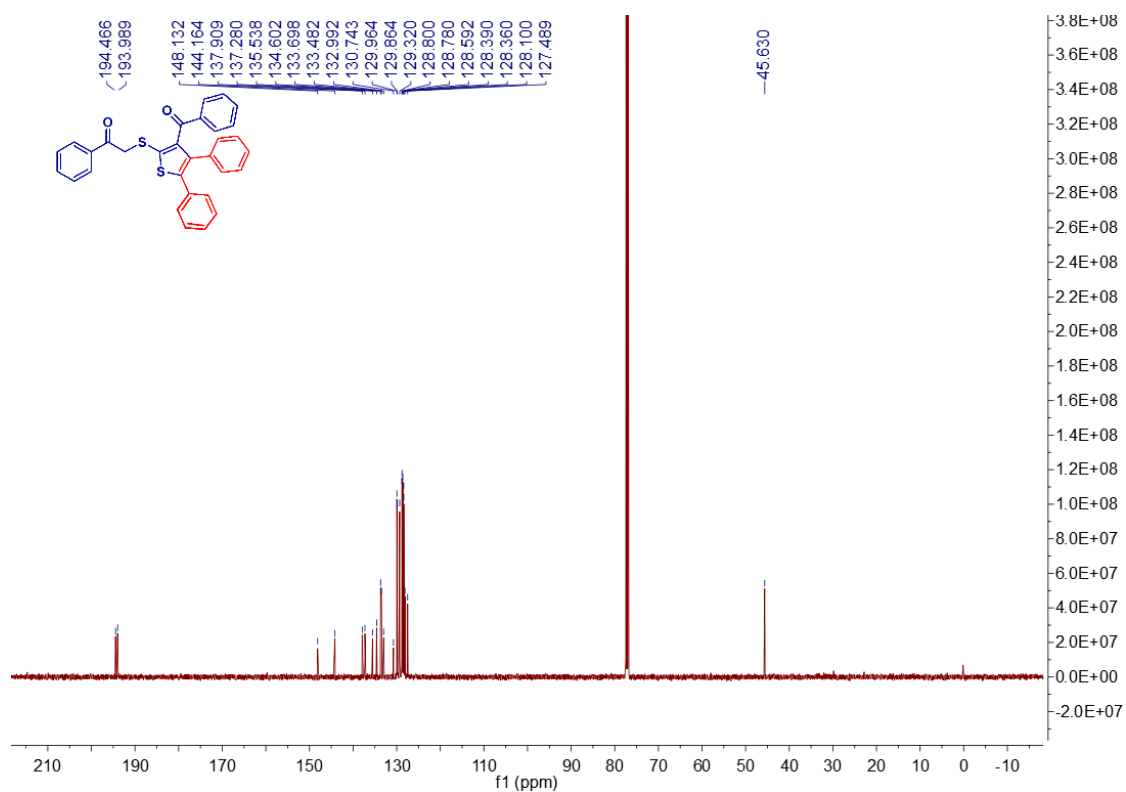

<sup>13</sup>C NMR Spectrum of 5k (CDCl<sub>3</sub>, 125 MHz)

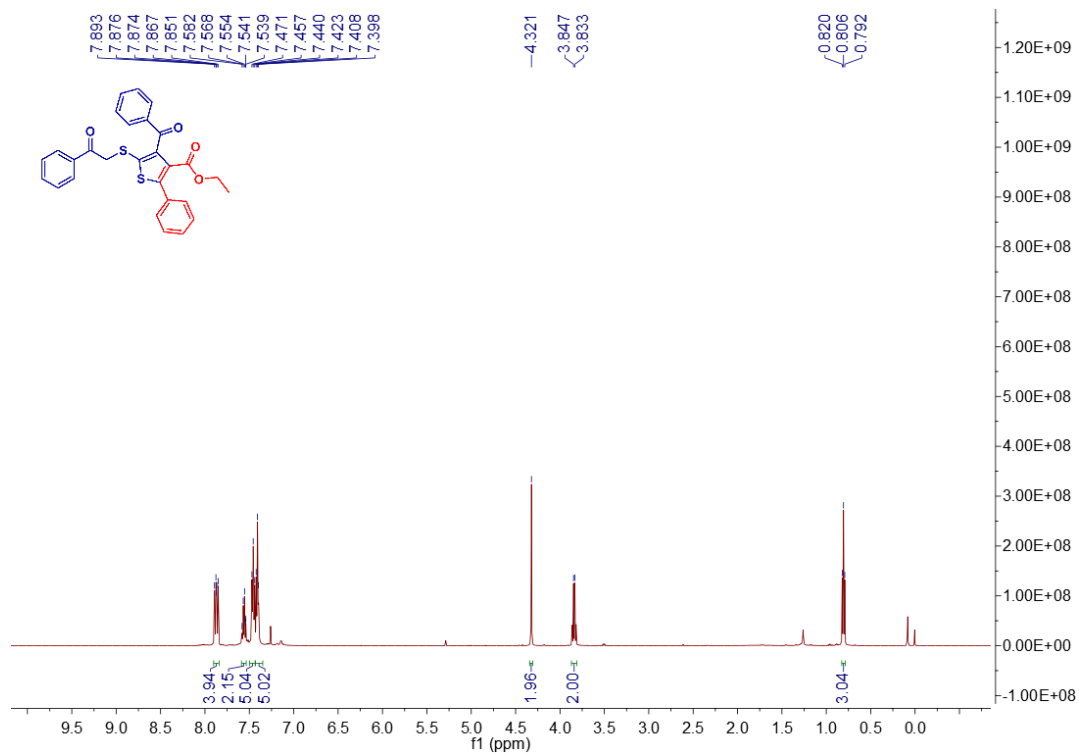

<sup>1</sup>H NMR Spectrum of 5l (CDCl<sub>3</sub>, 500 MHz)

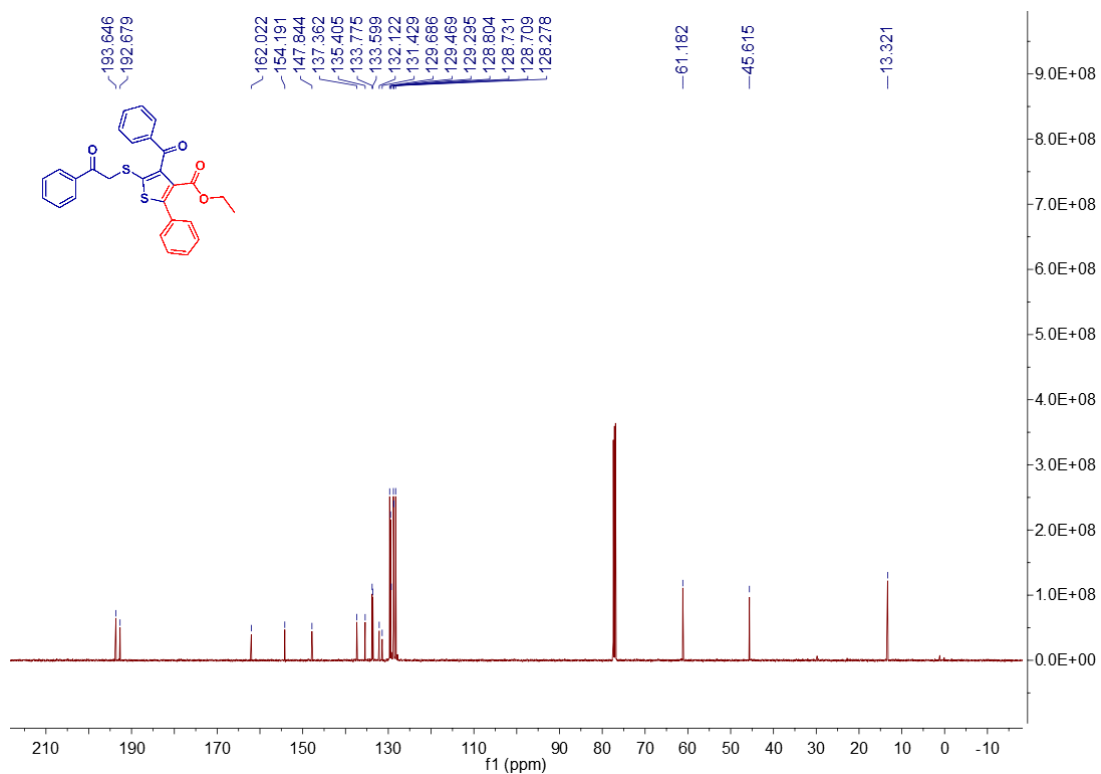

<sup>13</sup>C NMR Spectrum of 5l (CDCl<sub>3</sub>, 125 MHz)

### VIII. <sup>1</sup>H NMR Spectra of Detected Intermediate e

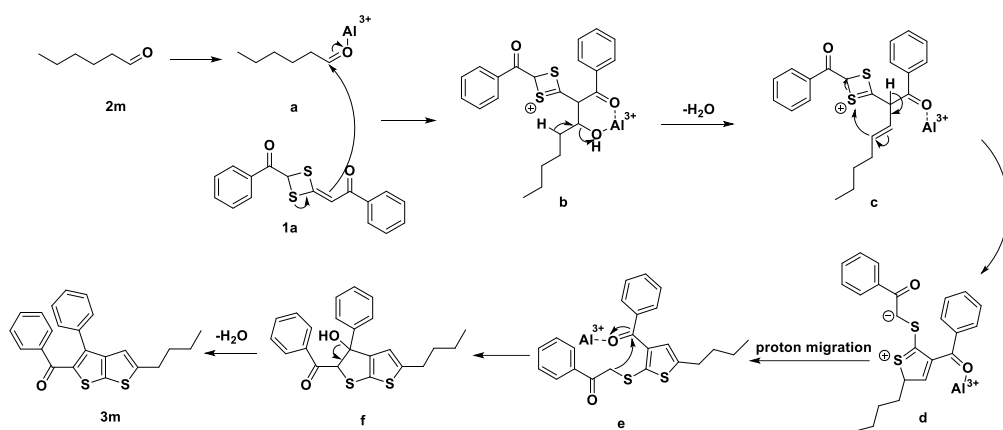

Figure S4 Proposed Mechanism of product 3 (with 3m as an example)

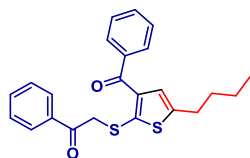

#### 2-((3-benzoyl-5-butylthiophen-2-yl)thio)-1-phenylethan-1-one (intermediate e with 3m as an example)

yellow solid;

<sup>1</sup>H NMR (500 MHz, Chloroform-*d*) δ 7.95-7.93 (m, 2H), 7.78 – 7.74 (m, 2H), 7.59 – 7.52 (m, 2H), 7.46-7.42 (m, 4H), 6.87 (s, 1H), 4.42 (s, 2H), 2.73 (t, *J* = 7.5 Hz, 2H), 1.60 (p, *J* = 7.5 Hz, 2H), 1.39 – 1.32 (m, 2H), 0.91 (t, *J* = 7.5 Hz, 3H).

<sup>13</sup>C NMR (125 MHz, Chloroform-*d*) δ 193.6, 190.7, 146.0, 140.4, 134.0, 138.7, 135.5, 133.7, 132.5, 129.6, 128.8, 128.8, 128.4, 126.8, 44.1, 33.4, 29.9, 22.2, 13.8.

HRMS (ESI): *m/z* calcd for (C<sub>23</sub>H<sub>22</sub>O<sub>2</sub>S<sub>2</sub>+H)<sup>+</sup>: 395.1134; found: 395.1140

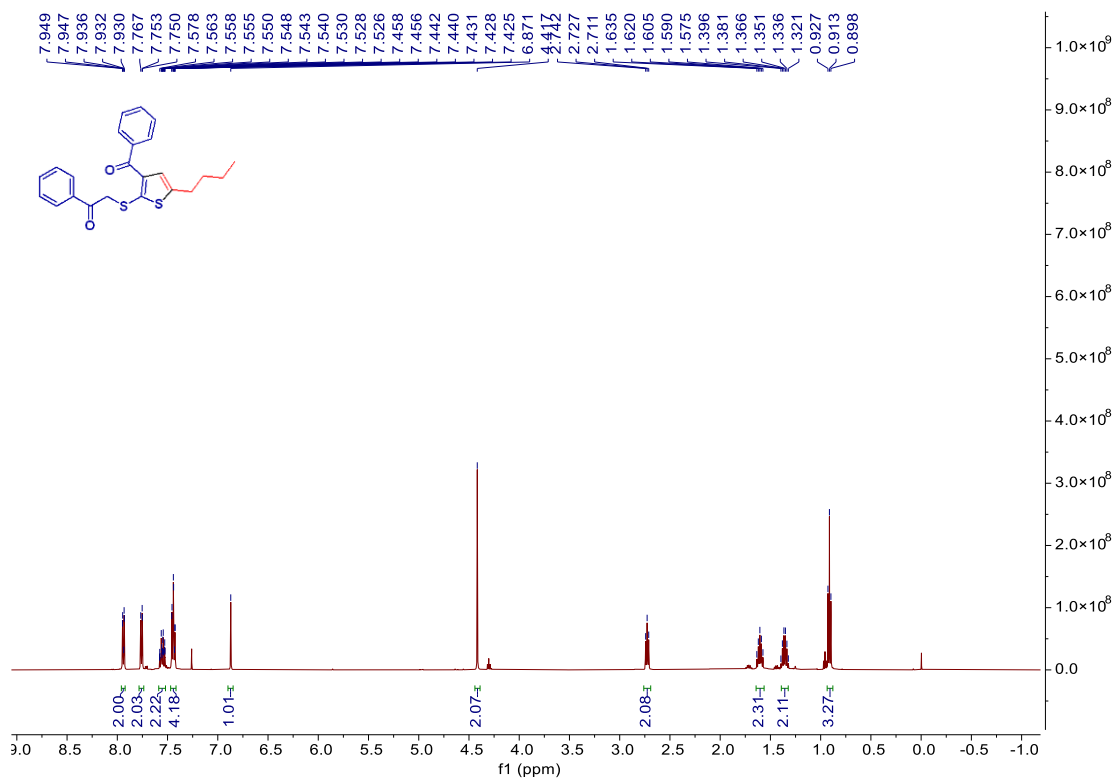

<sup>1</sup>H NMR Spectrum of Intermediate e (with 3m as an example) (CDCl<sub>3</sub>, 500 MHz)

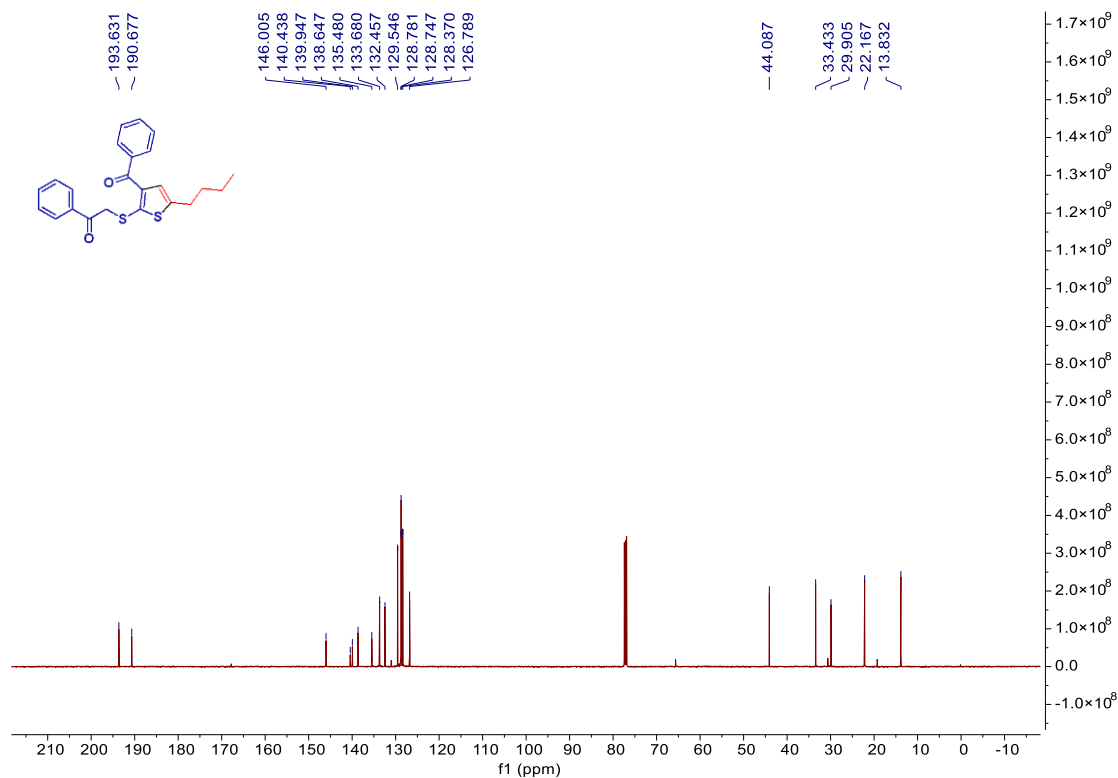

<sup>13</sup>C NMR Spectrum of Intermediate e (with 3m as an example) (CDCl<sub>3</sub>, 125 MHz)
